# Supplementary material for: Exome sequencing identifies recurrent BCOR alterations and the absence of KLF2, TNFAIP3 and MYD88 mutations in splenic diffuse red pulp small B-cell lymphoma
Source: PubMed Central journal article supplement — Haematologica. 2017 Jul 27;102(10):1758–66. doi: 10.3324/haematol.2016.160192 (PMC5622860; doi:10.3324/haematol.2016.160192), 2017-10
Supplement: 2016.160192.JALLADES_SUPPL.pdf [file 2016.160192.JALLADES_SUPPL.pdf]

## Exome sequencing identifies recurrent *BCOR* alterations and the absence of *KLF2*, *TNFAIP3* and *MYD88* mutations in splenic diffuse red pulp small B-cell lymphoma

Laurent Jallades,<sup>1,2</sup> Lucile Baseggio,<sup>1,2</sup> Pierre Sujobert,<sup>1,2,3</sup> Sarah Huet,<sup>1,2,3</sup> Kaddour Chabane,<sup>1,2</sup> Evelyne Callet-Bauchu,<sup>1,2,3</sup> Aurélie Verney,<sup>2,3</sup> Sandrine Hayette,<sup>1,2</sup> Jean-Pierre Desvignes,<sup>4,5</sup> David Salgado,<sup>4,5</sup> Nicolas Levy,<sup>4,5,6</sup> Christophe Bérout,<sup>4,5,6</sup> Pascale Felman,<sup>1,2</sup> Françoise Berger,<sup>2,3,7</sup> Jean-Pierre Magaud,<sup>1,2,3</sup> Laurent Genestier,<sup>2</sup> Gilles Salles<sup>2,3,8</sup> and Alexandra Traverse-Glehen<sup>2,3,7</sup>

<sup>1</sup>Hospices Civils de Lyon, Centre Hospitalier Lyon Sud, Laboratoire d'Hématologie, Pierre-Bénite; <sup>2</sup>Cancer Research Center of Lyon, INSERM 1052 CNRS 5286, Team "Clinical and Experimental Models of Lymphomagenesis", Faculté de Médecine et de Maïeutique Lyon-Sud Charles Mérieux, Oullins; <sup>3</sup>Université Claude Bernard Lyon-1; <sup>4</sup>Aix-Marseille Université, GMGF, 13385, Marseille; <sup>5</sup>INSERM, UMR\_S 910, 13385, Marseille; <sup>6</sup>APHM, Hôpital TIMONE Enfants, Laboratoire de Génétique Moléculaire, 13385, Marseille; <sup>7</sup>Hospices Civils de Lyon, Centre Hospitalier Lyon Sud, Laboratoire d'Anatomie Pathologique, Pierre-Bénite and <sup>8</sup>Hospices Civils de Lyon, Centre Hospitalier Lyon Sud, Service d'Hématologie, Pierre-Bénite, France

©2017 Ferrata Storti Foundation. This is an open-access paper. doi:10.3324/haematol.2016.160192

Received: November 24, 2016.

Accepted: July 12, 2017.

Pre-published: July 27, 2017.

Correspondence: gilles.salles@chu-lyon.fr

---

## **SUPPLEMENTAL DATA**

**Supplemental Figure 1 – Flowchart of the sequencing study**

**Supplemental Table 1 – Somatic mutations from whole-exome sequencing**

**Supplemental Table 2 – List of the targeted-genes sequenced, exon positions and coverage**

**Supplemental Table 3 – Recurrently mutated genes from whole-exome and targeted sequencing.**

The orange coloured boxes indicate a case investigated by whole-exome sequencing. VL: villous lymphoma cell (SDRPL); MZ: marginal zone cell (SMZL); HC: hairy cell (HCL); PB: peripheral blood; B+: CD19+ immunoselected sample. Distribution of mutations between HCL, SDRPL and SMZL cases is shown in Figure 1.

WORKFLOW

*Discovery cohort*



*Validation & comparison cohorts*



| WES sample | Gene name         | Name detail                                                                          | Chr   | gDNA position | Localisation | CNV | Reference | Somatic mutation | Type mut | Effect                         | VAF   | refseq        | CDNA          | Protein            | dbSNP ref. | SIFT prediction           | Polyphen-2 score prediction                                                    |
|------------|-------------------|--------------------------------------------------------------------------------------|-------|---------------|--------------|-----|-----------|------------------|----------|--------------------------------|-------|---------------|---------------|--------------------|------------|---------------------------|--------------------------------------------------------------------------------|
| 9          | ABCRC8            | ATP-binding cassette, sub-family C (CFTR/MRP), member 8                              | chr11 | 17,464,823    | Exon 9       |     | C         | T                | SNV      | missense                       | 0.110 | NM_001287174  | C1369G>A      | p.Gly457Arg        |            | Deleterious (score: 0.01) | probably damaging with a score of 1.000 (sensitivity: 0.00; specificity: 1.00) |
| 9          | ADAM12            | ADAM metalloproteinase domain 12                                                     | chr10 | 127,789,771   | Exon 14      |     | A         | T                | SNV      | missense                       | 0.481 | NM_003474     | C790G>A       | p.Val264Met        |            | Deleterious (score: 0.01) | probably damaging with a score of 0.999 (sensitivity: 0.14; specificity: 0.99) |
| 1          | ADAMTS17          | ADAM metalloproteinase with thrombospondin type 1 motif, 17                          | chr15 | 100,649,297   | Exon 14      |     | G         | A                | SNV      | missense                       | 0.183 | NM_1339057    | C1913C>T      | p.Ser638Leu        |            | Deleterious (score: 0.01) | benign with a score of 0.032 (sensitivity: 0.95; specificity: 0.82)            |
| 1          | ADAMTS18          | ADAM metalloproteinase with thrombospondin type 1 motif, 18                          | chr16 | 77,369,744    | Exon 12      |     | C         | T                | SNV      | missense                       | 0.552 | NM_1993955    | C1768G>A      | p.Gly659Ser        |            | Deleterious (score: 0)    | probably damaging with a score of 1.000 (sensitivity: 0.00; specificity: 1.00) |
| 15         | ADAMTS8           | ADAM metalloproteinase thrombospondin 8                                              | chr11 | 130,275,559   | Exon 8       |     | T         | S                | SNV      | missense                       | 0.508 | NM_007037     | C2564G>A      | p.Arg655Gln        |            | Deleterious (score: 0)    | probably damaging with a score of 0.987 (sensitivity: 0.73; specificity: 0.96) |
| 1          | ADAMTS11          | ADAMTS-like 1                                                                        | chr9  | 18,622,304    | Exon 5       |     | G         | A                | SNV      | missense                       | 0.224 | NM_052866     | C538G>A       | p.Gly80Arg         |            | Deleterious (score: 0)    | probably damaging with a score of 1.000 (sensitivity: 0.00; specificity: 1.00) |
| 12         | AOC6              | adenylate cyclase 6                                                                  | chr12 | 49,165,328    | Exon 18      |     | G         | A                | SNV      | missense                       | 0.395 | NM_020983     | C3016C>T      | p.Arg1006Trp       |            | Deleterious (score: 0)    | probably damaging with a score of 1.000 (sensitivity: 0.00; specificity: 1.00) |
| 13         | ADM2              | adrenomedullin 2                                                                     | chr22 | 50,921,279    | Exon 2       | +12 | A         | A                | SNV      | missense                       | 0.522 | NM_024866     | C394G>A       | p.Gly132Ser        |            | Deleterious (score: 0)    | probably damaging with a score of 1.000 (sensitivity: 0.00; specificity: 1.00) |
| 1          | AEBP2             | AE binding protein 2                                                                 | chr12 | 19,592,908    | Exon 1       |     | A         | G                | SNV      | missense                       | 0.304 | NM_027540     | C275A>G       | p.Gln294Arg        |            | Not scored                | possibly damaging with a score of 0.895 (sensitivity: 0.82; specificity: 0.94) |
| 15         | ALIC              | Albinocase                                                                           | chr2  | 3,749,964     | Exon 12      |     | C         | G                | SNV      | missense                       | 0.451 | NM_018436     | C987C>G       | p.Asn129Iys        |            | Tolerated (score: 0.16)   | possibly damaging with a score of 0.459 (sensitivity: 0.99; specificity: 0.80) |
| 3          | AMDH1             | amidohydrolase domain containing 1                                                   | chr12 | 96,360,197    | Exon 8       |     | C         | T                | DEL      | missense (1 D) Frameshift del. | 0.480 | NM_152435     | C1104del      | p.Arg369Met*34     |            | Deleterious (score: 0.03) | possibly damaging with a score of 0.943 (sensitivity: 0.80; specificity: 0.95) |
| 9          | ANKK5             | ankyrin repeat and sterile alpha motif domain containing 6                           | chr9  | 101,536,259   | Exon 9       |     | T         | -                | SNV      | missense                       | 0.351 | NM_173551     | C1212G>A      | p.Arg457Gln        |            | Deleterious (score: 0)    | possibly damaging with a score of 1.000 (sensitivity: 0.00; specificity: 1.00) |
| 15         | AOAH              | Acylcoylol hydrolase                                                                 | chr7  | 36,552,907    | Exon 21      |     | G         | A                | SNV      | missense                       | 0.430 | NM_001637     | C1679C>T      | p.Pro650Leu        |            | Deleterious (score: 0)    | probably damaging with a score of 0.988 (sensitivity: 0.73; specificity: 0.96) |
| 12         | ARHGAP20          | Rho GTPase activating protein 20                                                     | chr11 | 110,457,039   | Exon 13      |     | C         | T                | SNV      | missense                       | 0.220 | NM_020809     | C1316G>A      | p.Arg439Gln        |            | Deleterious (score: 0)    | probably damaging with a score of 1.000 (sensitivity: 0.00; specificity: 1.00) |
| 5          | ARHGAP15          | Rho guanine nucleotide exchange factor (GEF) 15                                      | chr17 | 8,218,534     | Exon 6       |     | C         | T                | SNV      | missense                       | 0.323 | NM_173728     | C1199C>T      | p.Pro401Leu        |            | Deleterious (score: 0)    | probably damaging with a score of 1.000 (sensitivity: 0.14; specificity: 0.99) |
| 3          | ARRG17            | Rho guanine nucleotide exchange factor (GEF) 17                                      | chr11 | 79,073,710    | Exon 14      |     | T         | C                | SNV      | missense                       | 0.361 | NM_014786     | C4927T>C      | p.Ser164Pro        |            | Deleterious (score: 0.03) | benign with a score of 0.999 (sensitivity: 0.14; specificity: 0.99)            |
| 8          | ASPM              | asp (abnormal spindle) homolog, microcephaly associated (Drosophila)                 | chr14 | 197,065,198   | Exon 19      |     | C         | T                | SNV      | missense                       | 0.426 | NM_018136     | C6917G>A      | p.Glu2973Iys       |            | Tolerated (score: 0.79)   | benign with a score of 0.328 (sensitivity: 0.90; specificity: 0.89)            |
| 3          | ATG14             | Atg14p                                                                               | chr14 | 55,836,626    | Exon 10      |     | A         | C                | SNV      | missense                       | 0.171 | NM_014924     | C1190T>G      | p.Val197Gly        |            | ?                         | benign with a score of 0.004 (sensitivity: 0.97; specificity: 0.59)            |
| 1          | ATG16L2           | ATG16 autophagy related 16-like 2 (S. cerevisiae)                                    | chr11 | 72,533,561    | Exon 6       |     | C         | T                | SNV      | missense                       | 0.420 | NM_033388     | C683C>T       | p.Ala228Val        |            | Deleterious (score: 0)    | probably damaging with a score of 1.000 (sensitivity: 0.00; specificity: 1.00) |
| 9          | ATM               | ataxia telangiectasia mutated                                                        | chr11 | 108,163,473   | Exon 30      |     | G         | G                | SNV      | missense                       | 0.465 | NM_1000051    | C4564G>C      | p.Gly1522Arg       |            | Deleterious (score: 0)    | probably damaging with a score of 0.999 (sensitivity: 0.16; specificity: 0.99) |
| 3          | ATP2B3            | ATPase, Ca++ transporting, plasma membrane 3                                         | chrX  | 152,845,563   | Exon 20      |     | C         | T                | SNV      | missense                       | 0.250 | NM_001001344  | C3470C>T      | p.Pro1157Leu       |            | Tolerated (score: 0.49)   | probably damaging with a score of 0.974 (sensitivity: 0.74; specificity: 0.96) |
| 12         | ATP6V0M4          | ATPase, H+ transporting, lysosomal V0 subunit a4                                     | chr7  | 138,455,988   | Exon 24      |     | A         | G                | SNV      | missense                       | 0.655 | NM_020622     | C57C>T        | p.Val21a           |            | Tolerated (score: 1)      | benign with a score of 0.000 (sensitivity: 1.00; specificity: 0.00)            |
| 9          | ATP1AF2           | ATP synthase mitochondrial F1 complex assembly factor 2                              | chr17 | 17,942,251    | Exon 1       |     | A         | A                | SNV      | missense                       | 0.260 | NM_145691.3   | C77C>T        | p.Ser269Ile        |            | Tolerated (score: 0.68)   | benign with a score of 0.000 (sensitivity: 1.00; specificity: 0.00)            |
| 9          | ATXN7L3           | ataxin 7-like 3                                                                      | chr17 | 42,274,988    | Exon 2       |     | G         | A                | SNV      | missense                       | 0.560 | NM_020218     | C162C>G       | p.Arg54Glu         |            | Tolerated (score: 0.55)   | possibly damaging with a score of 0.951 (sensitivity: 0.79; specificity: 0.95) |
| 9          | BAB3              | brain-specific angiogenesis inhibitor 3                                              | chr6  | 70,064,135    | Exon 27      |     | A         | A                | SNV      | missense                       | 0.479 | NM_001704     | C4A1157Glu    | p.Ala1157Glu       |            | Deleterious (score: 0)    | possibly damaging with a score of 0.651 (sensitivity: 0.87; specificity: 0.91) |
| 1          | BCAM              | basal cell adhesion molecule (Lutheran blood group)                                  | chr19 | 45,322,052    | Exon 10      |     | G         | A                | SNV      | missense                       | 0.341 | NM_005581     | C1249G>A      | p.Arg417Asn        |            | Deleterious (score: 0)    | probably damaging with a score of 0.999 (sensitivity: 0.14; specificity: 0.99) |
| 15         | BCOR              | BCO corepressor                                                                      | chrX  | 39,921,391    | Intron 9     |     | C         | A                | SNV      | intron+splice intron           | 0.417 | NM_001123384  | C4272+1G>T    | p.?                |            | ?                         | benign with a score of 0.079 (sensitivity: 0.93; specificity: 0.85)            |
| 8          | BCR               | breakpoint cluster region                                                            | chr22 | 23,524,007    | Exon 1       |     | T         | A                | SNV      | missense                       | 0.429 | NM_021574     | C860T>A       | p.His287Iys        |            | Deleterious (score: 0.01) | benign with a score of 0.000 (sensitivity: 1.00; specificity: 0.00)            |
| 8          | BCR               | breakpoint cluster region                                                            | chr22 | 23,524,411    | Exon 1       |     | C         | A                | SNV      | missense                       | 0.375 | NM_021574     | C1264T>C      | p.His227Iys        |            | Tolerated (score: 0.72)   | benign with a score of 0.000 (sensitivity: 1.00; specificity: 0.00)            |
| 3          | BRIC3             | baculoviral IAP repeat-containing 3 (IAP2)                                           | chr11 | 102,201,942   | Exon 7       |     | G         | G                | SNV      | missense (1 I) Frameshift ins. | 0.330 | NM_182962     | C1295dup      | p.Glu433Afs*5      |            | Tolerated (score: 0.68)   | benign with a score of 0.120 (sensitivity: 0.93; specificity: 0.86)            |
| 3          | BRIC5             | baculoviral IAP repeat-containing 5 (IAP4)                                           | chr17 | 76,212,831    | Exon 3       |     | A         | G                | SNV      | missense                       | 0.474 | NM_0011068    | C353G>T       | p.Lys126Arg        |            | Deleterious (score: 0)    | probably damaging with a score of 1.000 (sensitivity: 0.00; specificity: 1.00) |
| 12         | BMP4              | bone morphogenetic protein 4                                                         | chr14 | 54,418,588    | Exon 3       |     | N         | N                | SNV      | missense                       | 0.417 | NM_001202     | C353G>T       | p.Arg118Met        |            | Tolerated (score: 0.1)    | possibly damaging with a score of 0.568 (sensitivity: 0.88; specificity: 0.91) |
| 9          | BNIP1             | BCL2 adenovirus E1B 19kD interacting protein like                                    | chr1  | 151,016,100   | Exon 7       |     | G         | A                | SNV      | missense                       | 0.419 | NM_138278     | C748G>A       | p.Val250Ile        |            | Tolerated (score: 0.1)    | possibly damaging with a score of 0.568 (sensitivity: 0.88; specificity: 0.91) |
| 10         | BRPA2             | Bp1 fold containing family A, member 2                                               | chr20 | 31,765,957    | Exon 6       |     | A         | A                | SNV      | missense                       | 0.267 | NM_080574     | C588A>C       | p.Ser190Arg        |            | Tolerated (score: 0.7)    | probably damaging with a score of 0.985 (sensitivity: 0.74; specificity: 0.96) |
| 12         | BTF3              | Basic transcription factor 3                                                         | chr5  | 72,798,747    | Exon 4       |     | T         | C                | SNV      | missense                       | 0.455 | NM_001207     | C190A>T       | p.Val61Leu         |            | Tolerated (score: 0.46)   | possibly damaging with a score of 0.566 (sensitivity: 0.88; specificity: 0.91) |
| 9          | C6orf45           | Chromosome 6 open reading frame 45                                                   | chr4  | 159,836,465   | Exon 4       |     | C         | T                | SNV      | missense                       | 0.502 | NM_152543     | C403G>A       | p.Ala1315Thr       |            | Deleterious (score: 0.04) | possibly damaging with a score of 0.948 (sensitivity: 0.79; specificity: 0.95) |
| 13         | C6orf38           | Chromosome 6 open reading frame 38                                                   | chr6  | 127,901,428   | Exon 3       |     | T         | A                | SNV      | 3-UTR                          | 0.436 | NM_1786169    | C1197A>A      | p.?                |            | ?                         | possibly damaging with a score of 0.599 (sensitivity: 0.87; specificity: 0.91) |
| 13         | C6orf58           | Chromosome 6 open reading frame 58                                                   | chr6  | 127,901,428   | Exon 3       |     | T         | A                | SNV      | missense                       | 0.450 | NM_001201450  | C407C>T       | p.Arg235Ile*3      |            | Deleterious (score: 0.03) | benign with a score of 0.000 (sensitivity: 1.00; specificity: 0.00)            |
| 12         | C7orf76 (FUJ4280) | hypothetical LOC601388                                                               | chr7  | 96,115,626    | Exon 3       |     | C         | T                | SNV      | missense                       | 0.370 | NM_001136112  | C116G>A       | p.Arg39Ser         |            | Tolerated (score: 0.56)   | benign with a score of 0.000 (sensitivity: 1.00; specificity: 0.00)            |
| 13         | C8orf95           | Caspase 5, apoptosis-related cysteine peptidase                                      | chr11 | 104,879,687   | Exon 2       |     | -         | T                | SNV      | nononsense                     | 0.350 | NM_001145411  | C67dup        | p.Gln277*          |            | ?                         | probably damaging with a score of 0.999 (sensitivity: 0.14; specificity: 0.99) |
| 10         | CCDC110           | coiled-coil domain containing 110                                                    | chr4  | 186,379,562   | Exon 5       |     | A         | A                | SNV      | nononsense                     | 0.190 | NM_001145411  | C2179C>T      | p.Gln277*          |            | ?                         | probably damaging with a score of 0.590 (sensitivity: 0.88; specificity: 0.91) |
| 8          | CCDC180           | coiled-coil domain containing 180                                                    | chr9  | 100,092,968   | Exon18       |     | -         | A                | SNV      | NS (6) nonframeshift ins.      | 0.190 | NM_020893     | C2332_2337dup | p.Glu779_Glu780dup |            | ?                         | possibly damaging with a score of 0.580 (sensitivity: 0.88; specificity: 0.91) |
| 8          | CND3              | cyclin D3                                                                            | chr6  | 41,903,707    | Exon 5       |     | G         | A                | SNV      | missense (2D) Frameshift del.  | 0.430 | NM_10017360   | C85C>T        | p.Pro284Ser        |            | Tolerated (score: 0.08)   | probably damaging with a score of 0.999 (sensitivity: 0.14; specificity: 0.99) |
| 10         | CND3              | cyclin D3                                                                            | chr6  | 41,903,684    | Exon 5       |     | GT        | --               | DEL      | missense                       | 0.210 | NM_1001267434 | C872_873del   | p.His291Pro*32     |            | ?                         | possibly damaging with a score of 0.580 (sensitivity: 0.88; specificity: 0.91) |
| 1          | CD44              | CD44 molecule (Indian blood group)                                                   | chr11 | 35,226,181    | Exon 9       |     | A         | A                | SNV      | missense                       | 0.404 | NM_000610.3   | C1276A>T      | p.Thi426Ser        |            | Tolerated (score: 0.26)   | benign with a score of 0.000 (sensitivity: 1.00; specificity: 0.00)            |
| 9          | CDCP1             | CD4 domain combining protein 1                                                       | chr3  | 45,152,326    | Exon 4       |     | G         | T                | SNV      | nononsense                     | 0.434 | NM_0202842    | C663C>A       | p.Cys421*          |            | Tolerated (score: 0.45)   | benign with a score of 0.000 (sensitivity: 1.00; specificity: 0.00)            |
| 15         | CDH9              | Cadherin 9                                                                           | chr5  | 26,988,379    | Exon 2       |     | G         | T                | SNV      | missense                       | 0.568 | NM_016279     | C62C>A        | p.Thi21Asn         |            | ?                         | benign with a score of 0.006 (sensitivity: 0.94; specificity: 0.83)            |
| 12         | CDON              | Cdon homolog (mouse)                                                                 | chr11 | 125,893,374   | 5-UTR        |     | T         | T                | SNV      | 5-UTR                          | 0.250 | NM_016932     | C-3G>A        | p.?                |            | ?                         | benign with a score of 0.002 (sensitivity: 0.99; specificity: 0.30)            |
| 3          | CFTR              | cystic fibrosis transmembrane conductance regulator (ATP-binding cassette subunit C) | chr7  | 117,232,223   | Exon 14      | -7q | C         | C                | SNV      | missense                       | 1.000 | NM_000492     | C2002C>T      | p.Arg66Cys         |            | Deleterious (score: 0)    | probably damaging with a score of 1.000 (sensitivity: 0.00; specificity: 1.00) |
| 5          | CGN               | cholinergic receptor, nicotinic, delta                                               | chr1  | 151,508,807   | Exon 19      |     | G         | T                | SNV      | missense                       | 0.217 | NM_020770     | C3292G>T      | p.Arg1089Iyr       |            | Deleterious (score: 0)    | probably damaging with a score of 1.000 (sensitivity: 0.00; specificity: 1.00) |
| 1          | CHRD              | chondrin receptor, nuclear, delta                                                    | chr2  | 233,394,757   | Exon 7       |     | G         | A                | SNV      | missense                       | 0.397 | NM_000751     | p.Arg24His    |                    |            | Deleterious (score: 0.01) | probably damaging with a score of 0.994 (sensitivity: 0.69; specificity: 0.97) |
| 15         | CHST3             | Chondroitin sulfotransferase 13                                                      | chr3  | 126,260,891   | Exon 3       |     | A         | A                | SNV      | missense                       | 0.482 | NM_152889     | C496G>A       | p.Ala165Ile        |            | Tolerated (score: 1)      | benign with a score of 0.006 (sensitivity: 0.94; specificity: 0.83)            |
| 5          | CNTF              | chilery neurotrophic factor                                                          | chr11 | 58,391,693    | Exon 2       |     | A         | G                | SNV      | missense                       | 0.454 | NM_1000614    | C301A>G       | p.Thi101Asn        |            | Tolerated (score: 0.24)   | benign with a score of 0.002 (sensitivity: 0.99; specificity: 0.30)            |
| 7          | CNTNAP8           | contactin associated protein-like 8                                                  | chr9  | 43,861,081    | Exon 13      |     | T         | G                | SNV      | missense                       | 0.286 | NM_001201380  | C1951T>G      | p.Tyr652Arg        |            | Tolerated (score: 1)      | benign with a score of 0.000 (sensitivity: 1.00; specificity: 0.00)            |
| 5          | CNTNAP5           | contactin associated protein-like 5                                                  | chr2  | 125,232,398   | Exon 7       |     | A         | T                | SNV      | missense                       | 0.337 | NM_130073     | C1001A>T      | p.Tyr333Phe        |            | Deleterious (score: 0)    | probably damaging with a score of 0.999 (sensitivity: 0.14; specificity: 0.99) |
| 5          | COL2A1            | collagen, type XXV, alpha 1                                                          | chr1  | 86,488,533    | Exon 16      |     | C         | T                | SNV      | missense                       | 0.209 | NM_152890     | C2131G>A      | p.Gly711Arg        |            | Deleterious (score: 0)    | probably damaging with a score of 1.000 (sensitivity: 0.00; specificity: 1.00) |
| 15         | COL5A1            | Collagen type 5 alpha 1                                                              | chr9  | 137,712,052   | Exon 58      |     | G         | A                | SNV      | missense                       | 0.440 | NM_000093     | C4537G>A      | p.Gly1513Ser       |            | Deleterious (score: 0)    | probably damaging with a score of 1.000 (sensitivity: 0.00; specificity: 1.00) |
| 1          |                   |                                                                                      |       |               |              |     |           |                  |          |                                |       |               |               |                    |            |                           |                                                                                |

|    |                    |                                                                                     |       |             |            |     |     |     |                        |       |               |                  |                 |             |                           |                                                                                |
|----|--------------------|-------------------------------------------------------------------------------------|-------|-------------|------------|-----|-----|-----|------------------------|-------|---------------|------------------|-----------------|-------------|---------------------------|--------------------------------------------------------------------------------|
| 9  | EC04               | enhancer of mRNA decapping 4                                                        | chr16 | 67 914 521  | Exon 18    | C   | T   | SNV | missense               | 0.548 | NM_014329     | C2159C>T         | p.P6720L        | rs113019470 | Tolerated (score: 0.43)   | probably damaging with a score of 0.939 (sensitivity: 0.70, specificity: 0.97) |
| 9  | EEF2               | eukaryotic translation elongation factor 2                                          | chr19 | 3 980 968   | Exon 8     | G   | A   | SNV | missense               | 0.412 | NM_001961     | C0211C>T         | p.A634L         |             | Deleterious (score: 0)    | probably damaging with a score of 0.999 (sensitivity: 0.14, specificity: 0.99) |
| 9  | EEF3C              | eukaryotic elongation factor, selenium-cysteine-tRNA-specific                       | chr3  | 127 872 535 | Exon 1     | C   | G   | SNV | missense               | 0.490 | NM_1985197    | C185C>G          | p.A662G         |             | Deleterious (score: 0)    | benign with a score of 0.000 (sensitivity: 1.00, specificity: 0.00)            |
| 5  | EFCAB5             | EF-hand calcium binding domain 5                                                    | chr17 | 28 418 937  | Exon 21    | G   | A   | SNV | missense               | 0.130 | NM_198529     | C398G>A          | p.A61329Gln     |             | Deleterious (score: 0)    | probably damaging with a score of 1.000 (sensitivity: 0.00, specificity: 1.00) |
| 7  | EHH1               | EF-hand domain family, member A1                                                    | chr13 | 22 069 345  | Exon 11    | T   | G   | SNV | missense               | 0.459 | NM_152726     | C1155A>C         | p.G16385Asp     |             | Tolerated (score: 0.62)   | benign with a score of 0.183 (sensitivity: 0.22, specificity: 0.87)            |
| 3  | EGLAM              | EGF-like, fibronectin type III and laminin G domains                                | chr5  | 38 464 023  | Exon 6     | C   | C   | SNV | missense               | 0.384 | NM_286517     | C2965T>C         | p.Y7989His      |             | Tolerated (score: 0.15)   | benign with a score of 0.420 (sensitivity: 0.89, specificity: 0.90)            |
| 9  | ELF4               | ETfA-like factor 4 (ets domain transcription factor)                                | chrX  | 129 208 070 | Exon 4     | -   | T   | C   | SNV                    | 0.900 | NM_1001127197 | C294ddup         | p.Leu997His*12  |             | Deleterious (score: 0)    | probably damaging with a score of 1.000 (sensitivity: 0.00, specificity: 1.00) |
| 1  | ENAM               | enamelin                                                                            | chr4  | 71 509 818  | Exon 9     | A   | G   | SNV | missense               | 0.443 | NM_039189     | C2675A>G         | p.Y7692Asp      |             | Deleterious (score: 0)    | probably damaging with a score of 1.000 (sensitivity: 0.00, specificity: 1.00) |
| 5  | EPHA8              | Eph receptor A8                                                                     | chr3  | 96 533 611  | Exon 3     | C   | C   | SNV | missense               | 0.500 | NM_001080448  | C194dup          | p.A851Cys*42    |             | Deleterious (score: 0)    | probably damaging with a score of 1.000 (sensitivity: 0.00, specificity: 1.00) |
| 1  | EPHA8              | Eph receptor A8                                                                     | chr1  | 22 902 833  | Exon 1     | C   | T   | SNV | missense               | 0.190 | NM_020526.3   | C283C>T          | p.A495T         |             | Deleterious (score: 0)    | probably damaging with a score of 0.999 (sensitivity: 0.91, specificity: 0.88) |
| 9  | ERCC2              | ELKS/RAB6-interacting/CST family member 2                                           | chr3  | 56 173 623  | Exon 6     | G   | T   | SNV | missense               | 0.130 | NM_015576     | C1387C>A         | p.G1646Gly      |             | Deleterious (score: 0.03) | possibly damaging with a score of 0.843 (sensitivity: 0.83, specificity: 0.93) |
| 15 | ERN2               | Endoplasmic reticulum to nucleus signaling 2                                        | chr16 | 23 706 074  | Exon 17    | T   | T   | SNV | missense               | 0.545 | NM_033266     | C2219T>A         | p.Leu740Gln     |             | Deleterious (score: 0)    | probably damaging with a score of 0.972 (sensitivity: 0.77, specificity: 0.96) |
| 3  | EZH1               | enhancer of zeste homolog 1 (Drosophila)                                            | chr17 | 40 854 585  | Exon 21    | A   | T   | SNV | missense               | 0.150 | NM_001091     | C2209T>A         | p.Y737Asn       |             | Deleterious (score: 0)    | probably damaging with a score of 0.999 (sensitivity: 0.14, specificity: 0.99) |
| 15 | FAM151A            | Family with sequence similarity 151, member A                                       | chr1  | 55 081 691  | Intron 3   | A   | T   | SNV | Intron-splice intron   | 0.500 | NM_176762     | C415>T1>A        | p.?             |             | ?                         | ?                                                                              |
| 7  | FAM160B2           | Family with sequence similarity 160, member B2                                      | chr8  | 21 933 920  | Exon 3     | T   | T   | SNV | missense               | 0.447 | NM_022749     | C197A>T          | p.G1669Val      |             | Tolerated (score: 0.19)   | probably damaging with a score of 1.000 (sensitivity: 0.00, specificity: 1.00) |
| 3  | FAP                | fibroblast activation protein, alpha                                                | chr21 | 42 720 541  | Exon 6     | G   | T   | SNV | missense               | 0.386 | NM_206964     | C508G>T          | p.A4170Ser      |             | Deleterious (score: 0.12) | benign with a score of 0.270 (sensitivity: 0.91, specificity: 0.88)            |
| 12 | FAT1               | FAT tumor suppressor homolog 1 (Drosophila)                                         | chr2  | 163 072 487 | Exon 10    | G   | A   | SNV | missense               | 0.540 | NM_004460     | C787C>T          | p.A4265Tyr      | rs373219307 | Deleterious (score: 0.01) | probably damaging with a score of 0.999 (sensitivity: 0.14, specificity: 0.99) |
| 13 | FBX7               | F-box and leucine-rich repeat protein 7                                             | chr4  | 187 518 920 | Exon 24    | T   | C   | SNV | missense               | 0.338 | NM_005245     | C1284A>G         | p.Asp4095Gly    |             | Deleterious (score: 0)    | probably damaging with a score of 0.999 (sensitivity: 0.04, specificity: 0.99) |
| 8  | FCRL6              | Fc receptor-like 6                                                                  | chr5  | 15 937 245  | Exon 4     | C   | T   | SNV | missense               | 0.282 | NM_012304     | C1246C>T         | p.A4747Cys      |             | Deleterious (score: 0)    | probably damaging with a score of 1.000 (sensitivity: 0.00, specificity: 1.00) |
| 15 | FDCSP              | Follicular dendritic cell secreted protein                                          | chr1  | 159 779 320 | Exon 5     | G   | A   | SNV | missense               | 0.449 | NM_001004310  | C733G>A          | p.G1624Lys      |             | Tolerated (score: 0.23)   | benign with a score of 0.101 (sensitivity: 0.93, specificity: 0.85)            |
| 15 | FIG                | Flagglin                                                                            | chr4  | 71 099 896  | Exon 4     | A   | A   | SNV | missense               | 0.432 | NM_152997     | C230G>A          | p.G1684Lys      |             | Tolerated (score: 0.87)   | benign with a score of 0.010 (sensitivity: 0.96, specificity: 0.77)            |
| 15 | FMN2               | formin 2                                                                            | chr1  | 152 275 225 | Exon 3     | A   | T   | SNV | missense               | 0.393 | NM_020016     | C12137C>T        | p.Ser4046Leu    |             | Deleterious (score: 0)    | possibly damaging with a score of 0.820 (sensitivity: 0.84, specificity: 0.93) |
| 15 | FOX2               | Forkhead box B2                                                                     | chr9  | 79 635 772  | Exon 1     | A   | T   | SNV | missense               | 0.397 | NM_001013735  | C1202C>A         | p.Ala401Asp     |             | Deleterious (score: 0.01) | benign with a score of 0.990 (sensitivity: 0.99, specificity: 0.94)            |
| 1  | FOXL2              | forkhead box L2                                                                     | chr3  | 138 665 303 | Exon 1     | G   | A   | SNV | missense               | 0.508 | NM_023067     | C262T>C          | p.Phe88Leu      |             | Deleterious (score: 0.03) | probably damaging with a score of 0.999 (sensitivity: 0.14, specificity: 0.99) |
| 15 | FRL                | FRL-like                                                                            | chr4  | 48 533 298  | Exon 50    | C   | T   | SNV | missense               | 0.475 | NM_015030     | C678A>G          | p.Ser2200Gly    |             | Tolerated (score: 0.64)   | benign with a score of 0.002 (sensitivity: 0.99, specificity: 0.30)            |
| 10 | FUCA1              | fucosidase, alpha-L, tissue                                                         | chr1  | 24 175 323  | Exon 6     | T   | T   | SNV | missense               | 0.310 | NM_000147     | C976G>A          | p.Val328Ile     |             | Tolerated (score: 0.36)   | benign with a score of 0.001 (sensitivity: 0.99, specificity: 0.15)            |
| 15 | GGX3               | Golgi-associated, gamma adaptin ear containing, ARF binding protein 3               | chr17 | 73 238 912  | Exon 7 (9) | T   | C   | SNV | synonymous+splice exon | 0.368 | NM_138619     | C609A>G          | p.-(G)G203(Gln) |             | ?                         | ?                                                                              |
| 3  | GBA                | glp junction protein, beta 4, 30 kDa                                                | chr1  | 35 227 553  | Exon 2     | T   | T   | SNV | missense               | 0.150 | NM_153212     | C698C>T          | p.Thr233Met     |             | Deleterious (score: 0.03) | benign with a score of 0.069 (sensitivity: 0.94, specificity: 0.84)            |
| 1  | GLDN               | gliadin protein, beta 4, 30 kDa                                                     | chr15 | 51 693 885  | Exon 9     | G   | A   | SNV | missense               | 0.571 | NM_181789     | C1123G>A         | p.Val375Ile     |             | Tolerated (score: 0.28)   | benign with a score of 0.248 (sensitivity: 0.91, specificity: 0.88)            |
| 1  | GLP1R              | glucagon-like peptide 1 receptor                                                    | chr6  | 39 046 739  | Exon 9     | G   | T   | SNV | missense               | 0.333 | NM_002062     | C891G>T          | p.Trp297Cys     |             | Deleterious (score: 0)    | probably damaging with a score of 1.000 (sensitivity: 0.00, specificity: 1.00) |
| 15 | GLYR1              | Glyoxylate reductase 1 homolog (Arabidopsis)                                        | chr16 | 4 863 755   | Exon 12    | C   | G   | SNV | missense               | 0.452 | NM_032569     | C1102G>C         | p.Val368Leu     |             | Tolerated (score: 0.34)   | benign with a score of 0.269 (sensitivity: 0.91, specificity: 0.88)            |
| 7  | GNAT3              | guanine nucleotide binding protein, alpha transducin 3                              | chr17 | 63 052 715  | 5-UTR      | --- | --- | GC  | NS (3) frameshift ins. | 0.170 | NM_006572     | C-4_3insGGC      | p.?             |             | ?                         | ?                                                                              |
| 3  | GNL3               | guanine nucleotide binding protein-like 3 (nucleolar)                               | chr3  | 52 720 086  | Exon 3     | T   | C   | SNV | missense               | 0.406 | NM_001102386  | C295A>G          | p.Arg99Gly      |             | Tolerated (score: 0.51)   | benign with a score of 0.000 (sensitivity: 1.00, specificity: 0.00)            |
| 5  | GOLGB1             | golgin B1, golgi integral membrane protein                                          | chr3  | 121 417 221 | Exon 13    | G   | G   | SNV | missense               | 0.338 | NM_200826     | C-23T>G          | p.?             |             | Tolerated (score: 0.06)   | probably damaging with a score of 0.986 (sensitivity: 0.74, specificity: 0.96) |
| 15 | GPATCH2            | G patch domain containing 2                                                         | chr1  | 217 688 186 | Exon 6     | A   | G   | SNV | missense               | 0.397 | NM_018040     | C3121A>C         | p.Ser388Pro     |             | Deleterious (score: 0)    | probably damaging with a score of 0.988 (sensitivity: 0.73, specificity: 0.96) |
| 7  | GPC6               | glypican 6                                                                          | chr13 | 94 680 043  | Exon 4     | C   | T   | SNV | missense               | 0.425 | NM_1005708    | C772C>T          | p.A46258Tyr     |             | Deleterious (score: 0.01) | probably damaging with a score of 0.999 (sensitivity: 0.14, specificity: 0.99) |
| 5  | GPR115             | G protein-coupled receptor 115                                                      | chr6  | 47 681 816  | Exon 6     | G   | T   | SNV | nononsense             | 0.259 | NM_153838     | C835G>T          | p.Glu279*       |             | Deleterious (score: 0)    | benign with a score of 0.000 (sensitivity: 1.00, specificity: 0.00)            |
| 7  | GPR158             | G protein-coupled receptor 158                                                      | chr10 | 25 887 676  | Exon 11    | A   | C   | SNV | missense               | 0.410 | NM_020752     | C3121A>C         | p.Thr1041Pro    |             | ?                         | ?                                                                              |
| 5  | GPR75 / ASB3       | G protein-coupled receptor 75 / arylkyn repeat and SOCS box containing 3            | chr2  | 53 921 038  | Exon 18    | A   | G   | SNV | missense               | 0.393 | NM_001164165  | C1466T>C         | p.Ala820Pro     |             | Deleterious (score: 0)    | probably damaging with a score of 1.000 (sensitivity: 0.00, specificity: 1.00) |
| 5  | GPR98              | G protein-coupled receptor 98                                                       | chr5  | 89 948 177  | Exon 19    | G   | A   | SNV | missense               | 0.282 | NM_032119     | C3431G>A         | p.Arg1144Gln    | rs199735008 | Deleterious (score: 0)    | probably damaging with a score of 0.000 (sensitivity: 1.00, specificity: 0.00) |
| 3  | GPX4               | glutathione peroxidase 4 (phospholipid hydroperoxidase)                             | chr19 | 1 106 432   | Exon 6     | T   | T   | SNV | missense               | 0.308 | NM_002085     | C646C>T          | p.Arg216Gly     |             | Deleterious (score: 0.03) | probably damaging with a score of 1.000 (sensitivity: 0.00, specificity: 1.00) |
| 15 | GRII2              | Glutamate receptor, ionotropic, delta 2                                             | chr4  | 94 411 888  | Exon 12    | G   | A   | SNV | missense               | 0.522 | NM_001510     | C1957G>A         | p.Ala653Tyr     |             | Deleterious (score: 0)    | probably damaging with a score of 0.999 (sensitivity: 0.14, specificity: 0.99) |
| 9  | GRK5               | G protein-coupled receptor kinase 5                                                 | chr10 | 121 207 743 | Exon 13    | G   | A   | SNV | missense               | 0.485 | NM_000308     | C1375G>A         | p.Gly459Arg     |             | Deleterious (score: 0)    | benign with a score of 0.086 (sensitivity: 0.93, specificity: 0.85)            |
| 12 | GTPBP2             | GTP binding protein 2                                                               | chr6  | 43 589 199  | 3-UTR      | CT  | --  | DEL | (2 D) 3-UTR            | 0.240 | NM_019096     | C*151_*152de p.? | p.?             |             | ?                         | ?                                                                              |
| 5  | GUCA1A             | guanylate cyclase activator 1A (retina)                                             | chr6  | 47 130 732  | 5-UTR      | A   | A   | SNV | 5-UTR                  | 0.469 | NM_000469     | C-383G>A         | p.?             |             | ?                         | ?                                                                              |
| 7  | HAGH               | hydroxyacylglutathione hydrolase                                                    | chr16 | 1 867 207   | Exon 7     | C   | G   | SNV | missense               | 0.463 | NM_1003326    | C607G>C          | p.Ala203Pro     |             | Deleterious (score: 0)    | probably damaging with a score of 1.000 (sensitivity: 0.00, specificity: 1.00) |
| 12 | HIST1H1D           | histone cluster 1, H1d                                                              | chr6  | 26 234 828  | Exon 1     | C   | T   | SNV | missense               | 0.393 | NM_000330     | C334G>A          | p.Ala117Tyr     |             | Tolerated (score: 0.57)   | possibly damaging with a score of 0.900 (sensitivity: 0.82, specificity: 0.94) |
| 3  | HIST1H2AD/HIST1H3D | histone cluster 1, H2ad                                                             | chr6  | 26 199 187  | Exon 1     | G   | C   | SNV | missense               | 0.517 | NM_020065     | C285C>G          | p.Asp95Lys      |             | Deleterious (score: 0)    | probably damaging with a score of 0.992 (sensitivity: 0.70, specificity: 0.97) |
| 7  | HIST4A             | histone cluster 4, H4                                                               | chr12 | 14 923 868  | Exon 1     | C   | C   | SNV | missense               | 0.403 | NM_175054     | C151A>G          | p.Ile51Val      |             | Deleterious (score: 0)    | benign with a score of 0.061 (sensitivity: 0.94, specificity: 0.84)            |
| 15 | HIST4A             | histone cluster 4, H4                                                               | chr12 | 14 923 751  | Exon 1     | A   | A   | SNV | missense               | 0.320 | NM_175054     | C286G>T          | p.Ala90Ser      |             | Deleterious (score: 0)    | benign with a score of 0.201 (sensitivity: 0.92, specificity: 0.88)            |
| 8  | HK3                | hexokinase 3 (white cell)                                                           | chr5  | 176 308 744 | Exon 17    | C   | C   | SNV | missense               | 0.395 | NM_002215     | NM_2342G>A       | p.Arg781His     |             | Tolerated (score: 0.2)    | possibly damaging with a score of 0.801 (sensitivity: 0.84, specificity: 0.93) |
| 9  | HMCN1              | hemicentin 1                                                                        | chr1  | 185 969 291 | Exon 26    | C   | T   | SNV | missense               | 0.343 | NM_039195     | C3989C>T         | p.Pro1330Leu    |             | Deleterious (score: 0)    | benign with a score of 0.070 (sensitivity: 0.94, specificity: 0.84)            |
| 13 | HMMMR              | Hyduronan-mediated motility receptor                                                | chr5  | 162 911 228 | Exon 16    | G   | A   | SNV | missense               | 0.640 | NM_001142556  | C1993G>A         | p.Arg647Asn     |             | Tolerated (score: 0.23)   | benign with a score of 0.004 (sensitivity: 0.97, specificity: 0.99)            |
| 15 | HNRAS              | V-Ha-ras Harvey rat sarcoma viral oncogene homolog                                  | chr11 | 532 646     | Exon 5     | A   | G   | SNV | missense               | 0.516 | NM_001130442  | C560T>C          | p.Val187Val     |             | Tolerated (score: 0.4)    | benign with a score of 0.001 (sensitivity: 0.99, specificity: 0.15)            |
| 15 | hsa-mir-142        |                                                                                     | chr17 | 56 408 621  |            | A   | T   | SNV |                        | 0.459 |               |                  |                 |             | ?                         | ?                                                                              |
| 9  | HSPD1              | heat shock 60kDa protein 1 (Chaperonin)                                             | chr2  | 198 362 094 | Exon 3     | T   | C   | SNV | missense               | 0.431 | NM_002156     | C197A>G          | p.G1666Arg      |             | Deleterious (score: 0)    | probably damaging with a score of 0.993 (sensitivity: 0.70, specificity: 0.97) |
| 5  | HTR3B              | 5-hydroxytryptamine (serotonin) receptor 3B                                         | chr11 | 113 780 176 | Exon 2     | T   | C   | SNV | missense+splice exon   | 0.220 | NM_006028     | C212T>C          | p.Val714Asp     |             | Deleterious (score: 0)    | probably damaging with a score of 1.000 (sensitivity: 0.00, specificity: 1.00) |
| 5  | HIT5               | interferon-induced protein with tetratricopeptide repeats 5                         | chr10 | 91 178 173  | Exon 2     | T   | T   | SNV | missense               | 0.230 | NM_012420     | C1217T>A         | p.Val404Asp     |             | Deleterious (score: 0)    | possibly damaging with a score of 0.810 (sensitivity: 0.84, specificity: 0.93) |
| 7  | IHRTS              | insulin-like growth factor 2 mRNA binding protein 2                                 | chr3  | 188 407 168 | Exon 6     | T   | G   | SNV | missense               | 0.379 | NM_1006548    | C670A>C          | p.Asn224His     |             | Deleterious (score: 0.04) | benign with a score of 0.268 (sensitivity: 0.91, specificity: 0.88)            |
| 5  | IGFBP2             | inhibitor of kappa light polypeptide gene enhancer in B-cells, kinase beta          | chr8  | 42 178 326  | Exon 16    | C   | G   | SNV | missense               | 0.196 | NM_001556     | C1652C>G         | p.Pro551Arg     |             | Deleterious (score: 0)    | probably damaging with a score of 1.000 (sensitivity: 0.00, specificity: 1.00) |
| 7  | IKBKB              | Intracellular A particle-promoted polypeptide                                       | chr1  | 46 206 975  | Exon 3     | G   | A   | SNV | nononsense             | 0.394 | NM_001145349  | C323C>T          | p.Gln108*       |             | ?                         | ?                                                                              |
| 15 | IPF                | Integrin, alpha 8                                                                   | chr10 | 15 617 557  | Exon 24    | A   | T   | SNV | missense               | 0.420 | NM_003638     | C2409T>A         | p.His803Gln     |             | Tolerated (score: 0.51)   | benign with a score of 0.008 (sensitivity: 0.96, specificity: 0.61)            |
| 12 | ITGA8              | ITGA8                                                                               | chr8  | 45 791 093  | Exon 18    | A   | T   | SNV | missense               | 0.230 | NM_00109413   | C4645G>A         | p.Gly1549Ser    |             | Tolerated (score: 0.08)   | probably damaging with a score of 1.000 (sensitivity: 0.00, specificity: 1.00) |
| 10 | KAT5B / MYS13      | Ki(Vsine) acetyltransferase 6A / MYST histone acetyltransferase (nucleocytoplasmic) | chr6  | 39 284 653  | Exon 4     | A   | G   | SNV | missense               | 0.279 | NM_001135105  | C566T>C          | p.Met189Thr     |             | Deleterious (score: 0.04) | possibly damaging with a score of 0.628 (sensitivity: 0.87, specificity: 0.91) |
| 9  | KCTD3              | potassium channel tetramerisation domain containing 13                              | chr16 | 29 923 340  | Exon 3     | G   | C   | SNV | missense               | 0.290 | NM_178863     | C445C>G          | p.Ileu149Val    |             | Tolerated (score: 0.7)    | benign with a score of 0.001 (sensitivity: 0.99, specificity: 0.15)            |
| 15 | KDMA6A             | Lysine-specific demethylase 6A                                                      | chrX  | 44 938 411  | Exon 20    | T   | T   | SNV | nononsense             | 0.630 | NM_021140     | C2939A>T         | p.Lys987*       |             | ?                         | ?                                                                              |
| 15 | KHNVN              | KH and NFN domain containing                                                        | chr14 | 24 901 627  | Exon 3     | A   | G   | SNV | missense               | 0.453 | NM_015299     | C1160A>G         | p.Asp387Gly     |             | Tolerated (score: 0.08)   | possibly damaging with a score of 0.986                                        |

|    |                |                                                                  |       |             |           |    |    |     |                                |       |                                |                                |                    |                           |                                                                                |
|----|----------------|------------------------------------------------------------------|-------|-------------|-----------|----|----|-----|--------------------------------|-------|--------------------------------|--------------------------------|--------------------|---------------------------|--------------------------------------------------------------------------------|
| 7  | LRRCA4         | leucine rich repeat containing 24                                | chr8  | 145 747 961 | Exon 5    | G  | C  | SNV | missense                       | 0.385 | NM_001024678                   | C1440C>G                       | p.His480Leu        | Tolerated (score: 0.3)    | benign with a score of 0.005 (sensitivity: 0.97; specificity: 0.74)            |
| 15 | LRRCA0         | leucine rich repeats containing 40                               | chr1  | 70 644 647  | Exon 6    | A  | A  | SNV | missense                       | 0.486 | NM_017768                      | C691C>T                        | p.Leu231Phe        | Tolerated (score: 0.62)   | possibly damaging with a score of 0.473 (sensitivity: 0.89; specificity: 0.90) |
| 15 | LRR101         | leucine rich repeats and IQ motif containing 1                   | chr12 | 85 546 850  | Exon 21   | A  | G  | SNV | missense                       | 0.303 | NM_001079910                   | C448A>T                        | p.Asn1490Tyr       | Not scored (score: 0.0)   | benign with a score of 0.001 (sensitivity: 0.99; specificity: 0.15)            |
| 7  | LYP1A2         | lysophospholipase II                                             | chr1  | 24 121 246  | 3-UTR     | A  | G  | SNV | 3-UTR                          | 0.140 | NM_007260                      | C24A>G                         | p.A                | ?                         | ?                                                                              |
| 5  | MAK            | male germ cell-associated kinase                                 | chr6  | 10 804 119  | Exon 7    | A  | T  | SNV | missense                       | 0.407 | NM_005906                      | C497G>A                        | p.A>G166His        | Deleterious (score: 0)    | probably damaging with a score of 1.000 (sensitivity: 0.00; specificity: 1.00) |
| 1  | MAIAT1         | metastasis associated lung adenocarcinoma transcript 2           | chr11 | 65 266 801  | nRNA      | G  | A  | SNV | substitution?                  | 0.387 | NR_020819                      | n.1578G>A                      | non-protein coding | ?                         | ?                                                                              |
| 7  | MAKPL1L        | metastasis associated lung adenocarcinoma transcript 1           | chr11 | 55 518 998  | 5-UTR     | A  | A  | SNV | substitution?                  | 0.377 | NM_002819                      | n.1569G>A                      | non-protein coding | ?                         | ?                                                                              |
| 9  | MAPKAP5 (PRK4) | mitogen-activated protein kinase 1 interacting protein 1-like    | chr14 | 55 538 998  | 5-UTR     | C  | T  | SNV | 5-UTR                          | 0.400 | NM_144578                      | C-128C>T                       | p.?                | ?                         | ?                                                                              |
| 13 | MCCR           | mitogen-activated protein kinase-activated protein kinase 5      | chr12 | 112 308 936 | Exon 7    | A  | T  | SNV | missense                       | 0.376 | NM_139078                      | C531A>T                        | p.Gln177His        | Deleterious (score: 0)    | probably damaging with a score of 0.981 (sensitivity: 0.75; specificity: 0.96) |
| 7  | ME8B           | melanocortin 2 receptor (adrenocorticotrophic hormone)           | chr18 | 13 885 385  | Exon 2    | T  | T  | SNV | missense                       | 0.373 | NM_000529                      | C136G>A                        | p.Val45Ile         | Deleterious (score: 0)    | benign with a score of 0.223 (sensitivity: 0.91; specificity: 0.88)            |
| 15 | MEIK           | mediator complex subunit 8                                       | chr1  | 43 833 302  | Exon 3    | T  | -  | DEL | (1 D) frameshift del.          | 0.360 | NM_052877                      | C142del                        | p.Ser484His*9      | Tolerated (score: 1)      | benign with a score of 0.001 (sensitivity: 0.99; specificity: 0.15)            |
| 5  | MFLK           | Maternal embryonic leucine zipper kinase                         | chr9  | 36 665 555  | Exon 14   | A  | C  | SNV | missense                       | 0.462 | NM_014791                      | C138A>C                        | p.Asn462Ile        | Tolerated (score: 0.11)   | benign with a score of 1.000 (sensitivity: 0.00; specificity: 1.00)            |
| 5  | MFLP4          | microfilin-associated protein 4                                  | chr17 | 19 288 020  | Exon 6    | T  | T  | SNV | missense                       | 0.221 | NM_002404                      | C595G>A                        | p.Asp199Asn        | Deleterious (score: 0)    | probably damaging with a score of 0.993 (sensitivity: 0.74; specificity: 0.96) |
| 15 | MGA            | MAX gene associated                                              | chr15 | 42 028 541  | Exon 13   | A  | G  | SNV | missense                       | 0.448 | NM_001080541                   | C4079A>G                       | p.Asn1360Ser       | ?                         | ?                                                                              |
| 8  | MMMP8          | matrix metalloproteinase 8 (neutrophil collagenase)              | chr11 | 102 595 611 | 5-UTR     | T  | C  | SNV | 5-UTR                          | 0.480 | NM_002424                      | C-25A>G                        | p.?                | ?                         | ?                                                                              |
| 5  | MTR3A          | metastasis associated 1 family, member 3                         | chr15 | 42 028 541  | Exon 13   | A  | G  | SNV | missense                       | 0.439 | NM_020744                      | C613A>T                        | p.Asn1360Ser       | ?                         | ?                                                                              |
| 7  | MTR14          | myotubularin related protein 14                                  | chr3  | 9 730 394   | Exon 15   | C  | T  | SNV | missense                       | 0.482 | NM_001077525                   | C1250C>T                       | p.Prp417Leu        | Deleterious (score: 0)    | probably damaging with a score of 1.000 (sensitivity: 0.00; specificity: 1.00) |
| 9  | MTROR          | mechanistic target of rapamycin (serine/threonine kinase)        | chr1  | 11 187 857  | Exon 44   | C  | T  | SNV | missense                       | 0.571 | NM_004958                      | C640G>A                        | p.Glu2014Iys       | Tolerated (score: 0.07)   | possibly damaging with a score of 0.959 (sensitivity: 0.78; specificity: 0.95) |
| 3  | MYC            | v-myc myelocytomatosis viral oncogene homolog (avian)            | chr8  | 128 750 945 | Exon 2    | C  | T  | SNV | missense                       | 0.521 | NM_002467                      | C482C>T                        | p.Ser616Leu        | Deleterious (score: 0)    | possibly damaging with a score of 0.840 (sensitivity: 0.84; specificity: 0.93) |
| 3  | MYO1H          | myosin II                                                        | chr12 | 109 880 039 | Exon 26   | T  | T  | SNV | missense                       | 0.281 | NM_001101421                   | C2602C>T                       | p.Prp685Ser        | ?                         | ?                                                                              |
| 10 | NCKAP1         | NCK-associated protein 1 (NAP125)                                | chr2  | 183 846 048 | Exon 13   | G  | T  | SNV | missense                       | 0.311 | NM_013436                      | C1283A>C                       | p.Tyr425Ser        | Deleterious (score: 0)    | benign with a score of 0.200 (sensitivity: 0.92; specificity: 0.88)            |
| 5  | NCOA6          | nuclear receptor coactivator 6                                   | chr20 | 33 328 950  | Exon 11   | G  | A  | SNV | nonsense                       | 0.320 | NM_014071                      | C510C>T                        | p.Gln1704*         | Tolerated (score: 0.29)   | possibly damaging with a score of 0.875 (sensitivity: 0.83; specificity: 0.93) |
| 1  | NEB            | nebulin                                                          | chr2  | 153 534 502 | Exon 33   | A  | T  | SNV | missense                       | 0.481 | NM_0004543                     | C345C>A                        | p.Ala1152Asp       | ?                         | ?                                                                              |
| 3  | NEFL           | neurofilament, light polypeptide 68kDa                           | chr8  | 24 813 413  | Exon1     | G  | A  | SNV | missense                       | 0.120 | NM_006158                      | C617G>T                        | p.A>G206Leu        | ?                         | ?                                                                              |
| 1  | NFE213         | nuclear factor (erythroid-derived 2)-like 3                      | chr7  | 26 225 179  | Exon 4    | AA | -  | DEL | (2 D) frameshift del.          | 0.470 | C5551_1552del p.Asp1851Tyrfs*4 | C5551_1552del p.Asp1851Tyrfs*4 | p.Ser2421Phe       | ?                         | ?                                                                              |
| 9  | NOTCH2         | nipped 8 homolog (Drosophila)                                    | chr5  | 37 022 469  | Exon 29   | GA | GA | DEL | (2 D) frameshift del.          | 0.440 | NM_133433                      | C5551_1552del p.Asp1851Tyrfs*4 | p.Ser2421Phe       | ?                         | ?                                                                              |
| 12 | NR1D1          | nuclear receptor subfamily 1, group D, member 1                  | chr17 | 38 249 310  | 3-UTR     | G  | T  | SNV | 3-UTR                          | 0.286 | NM_020724                      | C1051G>A                       | p.Ala331Thr        | Tolerated (score: 0.51)   | probably damaging with a score of 1.000 (sensitivity: 0.00; specificity: 1.00) |
| 1  | NR2F1          | nuclear receptor subfamily 2, group F, member 1                  | chr5  | 92 929 327  | Exon 3    | G  | A  | SNV | missense                       | 0.212 | NM_000654                      | C1051G>A                       | p.Ala331Thr        | ?                         | ?                                                                              |
| 7  | NR4A3          | nuclear receptor subfamily 4, group A, member 3                  | chr9  | 102 595 699 | Exon 5    | T  | G  | SNV | nonsense                       | 0.366 | NM_006981                      | C1217T>A                       | p.Leu406*          | ?                         | ?                                                                              |
| 5  | NRAS           | neuroblastoma RAS viral (v-ras) oncogene homolog                 | chr1  | 115 258 747 | Exon 2    | C  | A  | SNV | missense                       | 0.266 | NM_005524                      | C35G>T                         | p.Gly22Ala         | ?                         | ?                                                                              |
| 15 | OC42           | Oculocutaneous albinism II                                       | chr15 | 28 259 989  | Exon 9    | C  | T  | SNV | missense                       | 0.500 | NM_000275                      | C977G>A                        | p.Ser326Asn        | Tolerated (score: 0)      | possibly damaging with a score of 0.718 (sensitivity: 0.86; specificity: 0.92) |
| 9  | OR10C1         | olfactory receptor, family 10, subfamily C, member 1             | chr6  | 29 408 027  | Exon 1    | C  | A  | SNV | missense                       | 0.489 | NM_013941                      | C235C>A                        | p.Leu73Met         | Deleterious (score: 1)    | benign with a score of 0.002 (sensitivity: 0.99; specificity: 0.30)            |
| 13 | OR10R2         | olfactory receptor, family 10, subfamily R, member 2             | chr1  | 158 450 449 | Exon 1    | C  | A  | SNV | missense                       | 0.420 | NM_010004472                   | C782G>C                        | p.Leu73Met         | Deleterious (score: 0)    | possibly damaging with a score of 0.892 (sensitivity: 0.82; specificity: 0.94) |
| 9  | OR13A1         | olfactory receptor, family 13, subfamily A, member 1             | chr10 | 45 799 340  | Exon 4    | G  | T  | SNV | missense                       | 0.237 | NM_001004297                   | C531C>A                        | p.His177Gln        | Deleterious (score: 0)    | benign with a score of 0.372 (sensitivity: 0.90; specificity: 0.89)            |
| 1  | OR14G6         | olfactory receptor, family 14, subfamily G, member 6             | chr1  | 248 512 380 | Exon 1    | A  | A  | SNV | missense                       | 0.478 | NM_001001918                   | C304G>A                        | p.Val10Meth        | Tolerated (score: 0.08)   | possibly damaging with a score of 0.930 (sensitivity: 0.81; specificity: 0.94) |
| 1  | OR113          | olfactory receptor, family 2, subfamily L, member 13             | chr1  | 248 262 866 | Exon 3    | A  | A  | SNV | missense                       | 0.516 | NM_175911                      | C189C>A                        | p.Ser63Met         | Deleterious (score: 0)    | probably damaging with a score of 0.964 (sensitivity: 0.78; specificity: 0.95) |
| 10 | OR5M11         | olfactory receptor, family 5, subfamily M, member 11             | chr11 | 56 310 243  | Exon 1    | C  | T  | SNV | missense                       | 0.323 | NM_001005245                   | C491G>A                        | p.A>G166His        | ?                         | ?                                                                              |
| 3  | OSBP1          | oxysterol binding protein-like 3                                 | chr7  | 24 911 634  | Exon 3    | G  | G  | SNV | missense                       | 0.315 | NM_145320                      | C151C>G                        | p.A>G166His        | ?                         | ?                                                                              |
| 5  | OSBP5          | oxysterol binding protein-like 5                                 | chr11 | 3 114 975   | Intron 16 | C  | T  | SNV | substitution intron-splice eir | 0.496 | NM_020896                      | C1809+1G>A                     | p.Prp651Asp        | ?                         | ?                                                                              |
| 5  | PAPPA2         | pappalysin 2                                                     | chr1  | 176 563 976 | Exon 3    | C  | A  | SNV | missense                       | 0.170 | NM_020318                      | C1236C>A                       | p.Ser412Arg        | Tolerated (score: 0.1)    | benign with a score of 0.000 (sensitivity: 1.00; specificity: 0.00)            |
| 15 | PARD3          | Par3 partitioning defective 3 homolog (C. elegans)               | chr10 | 34 408 641  | Exon 24   | A  | A  | SNV | missense                       | 0.474 | NM_019619                      | C3577G>T                       | p.Gly1193Trp       | Deleterious (score: 0)    | probably damaging with a score of 1.000 (sensitivity: 0.00; specificity: 1.00) |
| 12 | PARP2          | poly (ADP-ribose) polymerase 2                                   | chr14 | 20 825 945  | Exon 16   | C  | T  | SNV | nonsense                       | 0.348 | NM_001042418                   | C1741C>T                       | p.Gln581*          | ?                         | ?                                                                              |
| 8  | PAXA           | paired box 4                                                     | chr7  | 127 220 921 | 3-UTR     | G  | T  | SNV | 3-UTR                          | 0.342 | NM_006193                      | C197C>A                        | p.?                | ?                         | ?                                                                              |
| 9  | PCHGA9         | protocadherin gamma subfamily A, 9                               | chr5  | 140 782 712 | Exon 1    | T  | T  | SNV | missense                       | 0.419 | NM_018921                      | C193C>T                        | p.A>G65Cys         | ?                         | ?                                                                              |
| 12 | PDE8A          | phosphodiesterase 8A                                             | chr15 | 85 666 345  | Exon 19   | A  | G  | SNV | missense                       | 0.140 | NM_002605                      | C206G>A                        | p.Glu66Gly         | Deleterious (score: 0.02) | probably damaging with a score of 1.000 (sensitivity: 0.00; specificity: 1.00) |
| 9  | PDGFR          | platelet derived growth factor D                                 | chr11 | 103 870 840 | Exon 2    | G  | A  | SNV | missense                       | 0.431 | NM_025258                      | C268C>T                        | p.A>G90Trp         | Deleterious (score: 0.02) | probably damaging with a score of 1.000 (sensitivity: 0.00; specificity: 1.00) |
| 1  | PHK2           | phosphoinositide 3-kinase, alpha 2 (liver)                       | chrX  | 18 919 618  | Exon 27   | A  | A  | SNV | missense                       | 0.542 | NM_000292                      | C3012G>T                       | p.A>G120Asp        | Deleterious (score: 0.01) | benign with a score of 0.119 (sensitivity: 0.93; specificity: 0.86)            |
| 12 | PK3CA          | phosphoinositide-3-kinase, class 2, alpha polypeptide            | chr11 | 17 118 692  | Exon 26   | G  | A  | SNV | missense                       | 0.374 | NM_000265                      | C428C>T                        | p.Prp4141Leu       | Deleterious (score: 0.01) | probably damaging with a score of 0.972 (sensitivity: 0.77; specificity: 0.96) |
| 12 | PKL2           | polc-like kinase 2                                               | chr5  | 57 750 453  | Exon 14   | A  | A  | SNV | missense                       | 0.439 | NM_000362                      | C2015G>T                       | p.A>G672Leu        | Deleterious (score: 0.02) | probably damaging with a score of 1.000 (sensitivity: 0.00; specificity: 1.00) |
| 12 | PLD1           | phosphatidylinositol 1, 2-oxoglutarate 5-dioxygenase 1           | chr1  | 12 018 630  | Exon 9    | G  | T  | SNV | missense                       | 0.358 | NM_000302                      | C901G>T                        | p.Val901Ileu       | Tolerated (score: 1)      | benign with a score of 0.000 (sensitivity: 1.00; specificity: 0.00)            |
| 9  | PLNM4          | plein A4                                                         | chr7  | 131 888 142 | Exon 11   | C  | T  | SNV | LOH                            | 1.000 | NM_020911                      | C235G>A                        | p.Val173Met        | Tolerated (score: 0.06)   | probably damaging with a score of 0.983 (sensitivity: 0.74; specificity: 0.96) |
| 13 | POD2           | polymerase (DNA directed), delta2, regulatory subunit 50kDa      | chr7  | 44 154 986  | Exon 10   | A  | E  | SNV | missense                       | 0.520 | NM_001127218                   | C1017C>T                       | p.Prp386Leu        | Deleterious (score: 0.03) | probably damaging with a score of 0.998 (sensitivity: 0.27; specificity: 0.99) |
| 1  | PON2           | paraoxonase 2                                                    | chr7  | 95 033 877  | Exon 2    | C  | A  | SNV | missense                       | 0.241 | NM_001018161                   | C95G>T                         | p.A>G23Ile         | Deleterious (score: 0.01) | possibly damaging with a score of 0.943 (sensitivity: 0.80; specificity: 0.95) |
| 5  | PPP2R3A        | protein phosphatase 2 (formerly 2A), regulatory subunit B, alpha | chr3  | 135 742 005 | Exon 1    | C  | T  | SNV | missense                       | 0.245 | NM_181897                      | C94C>T                         | p.A>G23Trp         | Deleterious (score: 0.01) | probably damaging with a score of 1.000 (sensitivity: 0.00; specificity: 1.00) |
| 13 | PRH19          | Protein rich 19                                                  | chr19 | 42 814 545  | Exon 3    | G  | A  | SNV | missense                       | 0.950 | NM_199285                      | C724C>G                        | p.Prp42Ala         | Tolerated (score: 0.17)   | benign with a score of 0.002 (sensitivity: 0.99; specificity: 0.30)            |
| 1  | PRMD9          | proresonin (prosome, macropan) 26S subunit, non-ATPase, 9        | chr12 | 122 353 761 | Intron 2  | G  | G  | SNV | intron+splice intron           | 0.257 | NM_001261400                   | C556+1G>A                      | p.?                | ?                         | ?                                                                              |
| 5  | RAT1           | v-rat-1 murine leukemia viral oncogene homolog 1                 | chr3  | 12 645 688  | Exon 7    | G  | A  | SNV | missense                       | 0.297 | NM_002880                      | C781C>T                        | p.Prp261Ser        | Deleterious (score: 0)    | probably damaging with a score of 0.999 (sensitivity: 0.14; specificity: 0.99) |
| 5  | RARGF2         | Rap guanine nucleotide exchange factor (GEF) 2                   | chr4  | 160 262 962 | Exon 14   | A  | G  | SNV | missense                       | 0.150 | NM_014247                      | C2298G>C                       | p.Gln76His         | Tolerated (score: 0.05)   | benign with a score of 0.022 (sensitivity: 0.95; specificity: 0.80)            |
| 13 | RBFX1          | RNA binding protein, fox-1 homolog (C. elegans) 1                | chr16 | 7 657 328   | Exon 7    | A  | A  | SNV | missense                       | 0.200 | NM_145891                      | C724G>A                        | p.Glu242Iys        | ?                         | ?                                                                              |
| 12 | RFTN1          | raftlin, lipid raft linker 1                                     | chr3  | 16 419 287  | Exon 5    | C  | T  | SNV | missense                       | 0.415 | NM_015150                      | C764G>A                        | p.Ser255Asn        | Tolerated (score: 0.35)   | benign with a score of 0.009 (sensitivity: 0.96; specificity: 0.77)            |
| 15 | RFTN1          | Raftlin, lipid raft linker 1                                     | chr3  | 16 450 975  | Exon 4    | A  | T  | SNV | missense                       | 0.344 | NM_015150                      | C348T>A                        | p.Asp116Glu        | Tolerated (score: 0.77)   | benign with a score of 0.011 (sensitivity: 0.96; specificity: 0.78)            |
| 15 | ROCK1          | Rho-associated, coiled-coil containing protein kinase 1          | chr18 | 18 535 004  | Exon 31   | A  | G  | SNV | missense+splice exon           | 0.357 | NM_005406                      | C359T>C                        | p.Ile1198Trp       | Deleterious (score: 0)    | probably damaging with a score of 0.993 (sensitivity: 0.70; specificity: 0.97) |
| 3  | RPI1           | retinoblastoma 1 (autosomal dominant)                            | chr8  | 55 534 143  | Intron 2  | T  | C  | SNV | intron+splice intron           | 0.292 | NM_000629                      | C615+2T>C                      | p.?                | ?                         | ?                                                                              |
| 9  | RPH2           | RNA polymerase II associated protein 2                           | chr1  | 92 798 990  | Exon 9    | C  | T  | SNV | missense                       | 0.411 | NM_024813                      | C1498C>G                       | p.His50Glu         | Tolerated (score: 0.87)   | probably damaging with a score of 0.997 (sensitivity: 0.41; specificity: 0.98) |
| 12 | RTP3           | receptor (chemosensory) transporter protein 3                    | chr3  | 46 541 917  | Exon 2    | G  | T  | SNV | missense                       | 0.375 | NM_031440                      | C227G>T                        | p.Ser7Ile          | Tolerated (score: 0.09)   | probably damaging with a score of 0.990 (sensitivity: 0.72; specificity: 0.97) |
| 1  | SAAMD1         | sterile alpha motif domain containing 9-like                     | chr7  | 92 762 824  | Exon 5    | T  | T  | SNV | missense                       | 0.535 | NM_152703                      | C2461G>A                       | p.Val82Ile         | Tolerated (score: 0.58)   | benign with a score of 0.001 (sensitivity: 0.99; specificity: 0.15)            |
| 12 | SART3          | squamous cell carcinoma antigen recognized by T cells 3          | chr12 | 108 920 186 | Exon 16   | G  | A  | SNV | missense                       | 0.370 | NM_014706                      | C2460C>T                       | p.Ser687Phe        | Deleterious (score: 0.02) | possibly damaging with a score of 0.472 (sensitivity: 0.89; specificity: 0.90) |
| 9  | SCN10A         | sodium channel, voltage-gated, type X, alpha subunit             | chr3  | 38 743 338  | Exon 26   | A  | A  | SNV | missense                       | 0.546 | NM_000654                      | C4649C>T                       | p.Ser150Cys        | Deleterious (score: 0)    | probably damaging with a score of 1.000 (sensitivity: 0.00; specificity: 1.00) |
| 15 | SCN2A          | sodium channel, voltage-gated, type II, alpha subunit            | chr2  | 166 188 076 | Exon 14   | A  | A  | SNV | missense                       | 0.421 | NM_001040142                   | C2386C>A                       | p.Leu756Met        | Deleterious (score: 0)    | probably damaging with a score of 0.987 (sensitivity: 0.73; specificity: 0.96) |
| 15 | SEC16A         | SEC16 homolog A (S. cerevisiae)                                  | chr9  | 139 370 441 | Exon 14   | A  | A  | SNV | missense                       | 0.430 | NM_014866                      | C1627G>T                       | p.Val549Phe        | Deleterious (score: 0.02) | possibly damaging with a score of 0.834 (sensitivity: 0.84; specificity: 0.93) |
| 1  | SEC24B         | SEC24 family, member B (S. cerevisiae)                           | chr4  | 110 441 542 | Exon 12   | C  | C  |     |                                |       |                                |                                |                    |                           |                                                                                |

|    |                  |                                                                                 |       |             |          |      |              |                            |                               |       |                |                  |                   |                           |                                                                                |
|----|------------------|---------------------------------------------------------------------------------|-------|-------------|----------|------|--------------|----------------------------|-------------------------------|-------|----------------|------------------|-------------------|---------------------------|--------------------------------------------------------------------------------|
| 12 | SLC35B1          | solute carrier family 35, member B1                                             | chr17 | 47 781 506  | Exon 6   | A    | G            | SNV                        | missense                      | 0.329 | NM_005837      | C611T>C          | p.Met204Thr       | Deleterious (score: 0.01) | possibly damaging with a score of 0.885 (sensitivity: 0.82; specificity: 0.94) |
| 1  | SLC49A9          | solute carrier family 4, sodium bicarbonate cotransporter, member 9             | chr5  | 139 751 849 | Exon 20  | +    | A            | SNV                        | missense                      | 0.231 | NM_031467      | C2693G>A         | p.Asp688Gln       | Tolerated (score: 0.05)   | probably damaging with a score of 1.000 (sensitivity: 0.00; specificity: 1.00) |
| 7  | SMM120 (Clorf52) | small integral membrane protein 20                                              | chr4  | 25 915 975  | Exon 1   | -    | ACCCGCCCTCAT | INS (14 1) frameshift ins. | missense                      | 0.220 | NM_001145432   | C40_41ins14      | p.Phe141Tyrfs*9   | Deleterious (score: 0.05) | probably damaging with a score of 1.000 (sensitivity: 0.00; specificity: 1.00) |
| 9  | SRAFG17          | sperm associated antigen 17                                                     | chr1  | 118 579 467 | Exon 24  | C    | A            | SNV                        | missense                      | 0.385 | NM_206996      | C339G>T          | p.Gly1120Val      | Deleterious (score: 0)    | probably damaging with a score of 0.999 (sensitivity: 0.14; specificity: 0.99) |
| 12 | SRSF51           | steroid-5-alpha-reductase, alpha polypeptide 1 (3-oxo-5-alpha-steroid delta 4-d | chr5  | 6 663 008   | Exon 4   | G    | T            | SNV                        | missense                      | 0.409 | NM_001047      | C642G>T          | p.Trp214Cys       | Tolerated (score: 0.26)   | benign with a score of 0.055 (sensitivity: 0.94; specificity: 0.84)            |
| 10 | STAM             | signal transducing adaptor molecule (SH3 domain and TRAM motif) 1               | chr10 | 17 950 793  | Exon 13  | A    | C            | SNV                        | missense                      | 0.323 | NM_003473      | C1238C>A         | p.Pro4170Ile      | Tolerated (score: 0.86)   | benign with a score of 0.000 (sensitivity: 1.00; specificity: 0.80)            |
| 1  | STRADA           | STE20-related kinase adaptor alpha                                              | chr17 | 61 784 722  | Exon 8   | C    | T            | SNV                        | missense                      | 0.500 | NM_001003787.2 | C638G>A          | p.Gly213Asp       | Tolerated (score: 0.44)   | probably damaging with a score of 1.000 (sensitivity: 0.00; specificity: 1.00) |
| 1  | SYK              | spleen tyrosine kinase                                                          | chr9  | 99 636 993  | Exon 9   | A    | G            | SNV                        | missense                      | 0.574 | NM_001114167.1 | C1043A>G         | p.Tyr348Cys       | Deleterious (score: 0)    | probably damaging with a score of 1.000 (sensitivity: 0.00; specificity: 1.00) |
| 10 | TAF11            | TAF1 RNA polymerase II, TATA box binding protein (TBP)-associated factor, 210   | chr6  | 30 001 040  | Exon 17  | C    | T            | SNV                        | missense                      | 0.287 | NM_153809      | C2359C>T         | p.Arg787Trp       | Deleterious (score: 0)    | probably damaging with a score of 1.000 (sensitivity: 0.69; specificity: 0.97) |
| 9  | TAC2             | TAG kinase 2                                                                    | chr5  | 30 001 040  | Exon 17  | C    | T            | SNV                        | missense                      | 0.544 | NM_0004783     | C2359C>T         | p.Arg787Trp       | Deleterious (score: 0.01) | probably damaging with a score of 1.000 (sensitivity: 0.00; specificity: 1.00) |
| 3  | TAS2RH0          | taste receptor, type 2, member 40                                               | chr7  | 142 919 883 | Exon 1   | G    | T            | LOH                        | missense                      | 1.000 | NM_170882      | C512G>T          | p.Ser171Ile       | Tolerated (score: 0.17)   | benign with a score of 0.030 (sensitivity: 0.95; specificity: 0.82)            |
| 13 | TBC1D108         | TBC1 domain family, member 108                                                  | chr16 | 30 369 653  | Exon 9   | G    | A            | SNV                        | missense                      | 0.770 | NM_015527      | C2039C>T         | p.Pro680Leu       | Deleterious (score: 0)    | probably damaging with a score of 1.000 (sensitivity: 0.00; specificity: 1.00) |
| 13 | TBC1D19          | TBC1 domain family, member 19                                                   | chr4  | 26 661 289  | Exon 8   | T    | A            | SNV                        | nonsense                      | 0.590 | NM_018317      | C551T>A          | p.Leu184*         | Deleterious (score: 0)    | probably damaging with a score of 0.968 (sensitivity: 0.77; specificity: 0.95) |
| 15 | TRK1             | TANK-binding kinase 1                                                           | chr12 | 64 873 797  | Exon 7   | A    | C            | SNV                        | missense                      | 0.352 | NM_013254      | C707A>C          | p.Lys236Ile       | Deleterious (score: 0)    | probably damaging with a score of 0.999 (sensitivity: 0.14; specificity: 0.99) |
| 5  | TCF7L2           | transcription factor 7-like 2 (T-cell specific, HMG-box)                        | chr10 | 114 900 998 | Exon 6   | T    | C            | SNV                        | missense                      | 0.120 | NM_001146274   | C608T>C          | p.Leu203Pro       | Tolerated (score: 0.11)   | probably damaging with a score of 1.000 (sensitivity: 0.00; specificity: 1.00) |
| 1  | TCHH             | trichohyalin                                                                    | chr1  | 152 082 585 | Exon 3   | CTCT | DEL          | DEL                        | missense (4 D) frameshift del | 0.280 | NM_007113.2    | C3105_3108del    | p.Glu1036Asnfs*58 | ?                         | ?                                                                              |
| 8  | TEN1             | transcobalamin (vitamin B12 binding protein, R binder family)                   | chr11 | 59 623 465  | Exon 6   | C    | A            | SNV                        | missense                      | 0.359 | NM_0010062     | C814G>T          | p.Val272Leu       | Tolerated (score: 0.12)   | benign with a score of 0.043 (sensitivity: 0.94; specificity: 0.83)            |
| 13 | TD02             | tryptophan 2,3-dioxygenase                                                      | chr4  | 158 835 493 | Exon 8   | G    | A            | SNV                        | missense                      | 0.500 | NM_005651      | C745G>A          | p.Glu249Iys       | Deleterious (score: 0.05) | benign with a score of 0.036 (sensitivity: 0.94; specificity: 0.82)            |
| 5  | TENM3 (ODZ3)     | odt, odd O2/ten homolog 3 (Drosophila)                                          | chr4  | 186 675 659 | Exon 21  | G    | A            | SNV                        | missense                      | 0.469 | NM_001080477   | C419G>A          | p.Arg1380Gln      | Tolerated (score: 0.12)   | probably damaging with a score of 0.995 (sensitivity: 0.68; specificity: 0.97) |
| 12 | TFR3             | transforming growth factor, beta 3                                              | chr14 | 76 425 610  | Exon 7   | T    | C            | SNV                        | missense                      | 0.556 | NM_003239      | C1159A>G         | p.Thr387Val       | Tolerated (score: 0.32)   | probably damaging with a score of 0.992 (sensitivity: 0.70; specificity: 0.97) |
| 12 | TRHA             | thyroid hormone receptor, alpha (erythroid/leukemia viral (v-erb-a) oncogr      | chr17 | 38 249 310  | Exon 10  | C    | T            | SNV                        | missense                      | 0.286 | NM_001190919   | C1148C>T         | p.Asp383Val       | Tolerated (score: 0.17)   | benign with a score of 0.035 (sensitivity: 0.94; specificity: 0.82)            |
| 13 | TRP3             | tight junction protein 3 (zona occludens 3)                                     | chr19 | 3 733 793   | Exon 6   | C    | T            | SNV                        | missense                      | 0.450 | NM_014428      | C817C>T          | p.Arg273Trp       | Deleterious (score: 0.01) | probably damaging with a score of 1.000 (sensitivity: 0.00; specificity: 1.00) |
| 15 | TMEM196          | transmembrane protein 196 ENSG00000179452                                       | chr7  | 19 769 078  | 5-UTR    | G    | A            | SNV                        | 5-UTR                         | 0.411 | NM_152774      | C148-17C>A       | p.?               | ?                         | ?                                                                              |
| 9  | TMEM26           | transmembrane protein 26                                                        | chr10 | 63 170 123  | Exon 6   | A    | T            | SNV                        | missense                      | 0.110 | NM_178505      | C1064G>A         | p.Arg355Gln       | Tolerated (score: 0.38)   | benign with a score of 0.003 (sensitivity: 0.98; specificity: 0.44)            |
| 10 | TNFRSS5          | transmembrane protease, serine 5                                                | chr11 | 115 570 383 | Exon 3   | G    | A            | SNV                        | missense                      | 0.427 | NM_030770      | C139C>T          | p.Arg47Cys        | Deleterious (score: 0)    | probably damaging with a score of 0.994 (sensitivity: 0.69; specificity: 0.97) |
| 10 | TNFR18L2         | tumor necrosis factor, alpha-induced protein 8-like 2 / sodium channel modifier | chr1  | 151 134 223 | 5-UTR    | G    | A            | SNV                        | 5-UTR                         | 0.239 | NM_024575      | C2249T>C         | p=                | ?                         | ?                                                                              |
| 15 | TNFK             | TNFR2 and NCK interacting kinase                                                | chr3  | 170 811 680 | Exon 21  | T    | A            | SNV                        | missense                      | 0.513 | NM_001161662   | C258G>G          | p.Asp853Gly       | Tolerated (score: 0.38)   | benign with a score of 0.000 (sensitivity: 1.00; specificity: 0.00)            |
| 13 | TP311            | tumor protein p53 inducible protein 11                                          | chr4  | 44 956 544  | Exon 4   | A    | C            | SNV                        | INS (10 1) frameshift ins     | 0.290 | NM_001076787   | C452_461dup      | p.Gly1558Phefs*2  | ?                         | ?                                                                              |
| 5  | TRAF3            | TNF receptor-associated factor 3                                                | chr14 | 103 338 301 | Exon 4   | A    | G            | SNV                        | missense                      | 0.588 | NM_145725      | C293A>G          | p.Asp98Gly        | Deleterious (score: 0.01) | benign with a score of 0.027 (sensitivity: 0.95; specificity: 0.81)            |
| 5  | TRIM14           | tripartite motif-containing 14                                                  | chr9  | 100 843 377 | 3-UTR    | G    | A            | SNV                        | 3-UTR                         | 0.217 | NM_033220      | C*28+6347C>T p.? | p.?               | ?                         | ?                                                                              |
| 13 | TRIM5            | tripartite motif-containing 5                                                   | chr11 | 5 686 185   | Exon 8   | C    | T            | SNV                        | missense                      | 0.438 | NM_030304      | C1336G>A         | p.Ala447Ile       | Tolerated (score: 0.06)   | probably damaging with a score of 0.988 (sensitivity: 0.73; specificity: 0.96) |
| 10 | TSHR             | thyroid stimulating hormone receptor                                            | chr14 | 81 610 635  | Exon 10  | T    | A            | SNV                        | missense                      | 0.308 | NM_000369      | C2233T>A         | p.Ser745Trp       | Tolerated (score: 0.46)   | benign with a score of 0.13 (sensitivity: 0.96; specificity: 0.78)             |
| 1  | TSEFAR           | thrombospondin-type laminin G domain and EAR repeats                            | chr21 | 45 945 654  | Exon 8   | C    | G            | SNV                        | missense                      | 0.403 | NM_144991      | C1218G>C         | p.Trp40Cys        | Deleterious (score: 0)    | probably damaging with a score of 1.000 (sensitivity: 0.00; specificity: 1.00) |
| 8  | TTM2             | Tweety homolog 2                                                                | chr17 | 72 240 168  | Exon 6   | C    | A            | SNV                        | missense                      | 0.455 | NM_032646      | C784G>A          | p.Ala262Trp       | Tolerated (score: 0.19)   | benign with a score of 0.009 (sensitivity: 0.96; specificity: 0.77)            |
| 3  | TULP2            | tubby like protein 2                                                            | chr19 | 49 399 684  | Intron 4 | C    | A            | SNV                        | Intron+splice intron          | 0.412 | NM_003323      | C211+3G>T        | p.?               | ?                         | ?                                                                              |
| 15 | TNND08           | Thioredoxin domain containing 8                                                 | chr9  | 113 096 602 | Intron 1 | T    | A            | SNV                        | Intron+splice intron          | 0.472 | NM_001003936   | C25_2A>T         | p.?               | ?                         | ?                                                                              |
| 3  | UZA1             | U2 small nuclear RNA auxiliary factor 1                                         | chr21 | 44 524 456  | Exon 2   | G    | A            | SNV                        | missense                      | 0.300 | NM_001025203   | C101C>T          | p.Ser340Phe       | Deleterious (score: 0)    | probably damaging with a score of 1.000 (sensitivity: 0.00; specificity: 1.00) |
| 10 | USP29            | ubiquitin specific peptidase 29                                                 | chr19 | 57 642 397  | Exon 4   | G    | T            | SNV                        | missense                      | 0.333 | NM_020903      | C234G>T          | p.Gly785Val       | Deleterious (score: 0.04) | possibly damaging with a score of 0.761 (sensitivity: 0.85; specificity: 0.92) |
| 1  | WDR36            | WD repeat domain 36                                                             | chr5  | 110 428 134 | Exon 1   | G    | A            | SNV                        | missense                      | 0.634 | NM_139281      | C148G>A          | p.Gly50Arg        | Tolerated (score: 0.12)   | benign with a score of 0.392 (sensitivity: 0.90; specificity: 0.90)            |
| 1  | WDR37            | WD repeat domain 37                                                             | chr10 | 1 151 191   | Exon 11  | T    | G            | SNV                        | missense                      | 0.242 | NM_014023      | C1087T>G         | p.Phe383Val       | Deleterious (score: 0)    | probably damaging with a score of 0.992 (sensitivity: 0.70; specificity: 0.97) |
| 1  | WDR93            | WD repeat domain 93                                                             | chr15 | 90 280 856  | Exon 15  | G    | A            | SNV                        | missense                      | 0.284 | NM_020212      | C1861G>A         | p.Arg554His       | Tolerated (score: 0.17)   | possibly damaging with a score of 0.850 (sensitivity: 0.83; specificity: 0.93) |
| 5  | WFDC3            | WAP four-disulfide core domain 3                                                | chr20 | 44 404 239  | Exon 6   | G    | A            | SNV                        | missense                      | 0.217 | NM_080614      | C496C>T          | p.Arg166Ile       | Tolerated (score: 0.07)   | possibly damaging with a score of 0.811 (sensitivity: 0.84; specificity: 0.93) |
| 9  | WIS              | wortless homolog (Drosophila) = GPR117                                          | chr1  | 68 619 327  | Exon 5   | G    | T            | SNV                        | missense                      | 0.563 | NM_001002292   | C670C>A          | p.Gln224Iys       | Deleterious (score: 0)    | probably damaging with a score of 0.999 (sensitivity: 0.14; specificity: 0.99) |
| 3  | WNK1             | WNK lysine deficient protein kinase 1                                           | chr12 | 863 236     | Exon 1   | C    | T            | SNV                        | missense                      | 0.400 | NM_213655      | C509C>T          | p.Pro169Ser       | Deleterious (score: 0.04) | probably damaging with a score of 0.13 (sensitivity: 0.96; specificity: 0.78)  |
| 12 | VIP1             | Vip1 domain family, member 1                                                    | chr1  | 54 332 580  | Exon 8   | T    | C            | SNV                        | missense                      | 0.424 | NM_018982      | C499A>G          | p.Ile167Val       | Tolerated (score: 1)      | benign with a score of 0.000 (sensitivity: 1.00; specificity: 0.00)            |
| 15 | VIPM1            | Vip motif containing 1                                                          | chr14 | 75 265 344  | Exon 5   | A    | A            | SNV                        | missense                      | 0.485 | NM_019589      | C3344G>A         | p.Arg115Gln       | Tolerated (score: 0.14)   | benign with a score of 0.440 (sensitivity: 0.89; specificity: 0.90)            |
| 3  | ZAN              | zinc finger protein 189                                                         | chr7  | 100 361 488 | Exon 21  | C    | C            | SNV                        | missense                      | 0.346 | NM_003386      | C4046T>C         | p.Met11349Thr     | Deleterious (score: 0)    | benign with a score of 0.451 (sensitivity: 0.99; specificity: 0.90)            |
| 15 | ZNF536           | Zinc finger protein 536                                                         | chr9  | 104 170 672 | Exon 4   | T    | C            | SNV                        | missense                      | 0.409 | NM_197977      | C496T>C          | p.Tyr168His       | Deleterious (score: 0)    | benign with a score of 0.065 (sensitivity: 0.94; specificity: 0.84)            |
| 15 | ZNF610           | Zinc finger protein 610                                                         | chr19 | 30 936 603  | Exon 2   | A    | C            | SNV                        | missense                      | 0.543 | NM_014717      | C2134G>A         | p.Glu721Iys       | Deleterious (score: 0)    | possibly damaging with a score of 0.953 (sensitivity: 0.79; specificity: 0.95) |
| 15 | ZNF746           | Zinc finger protein 746                                                         | chr19 | 52 856 938  | Exon 4   | C    | T            | SNV                        | missense                      | 0.636 | NM_001161425   | C67C>T           | p.Arg23Cys        | Tolerated (score: 0.05)   | benign with a score of 0.204 (sensitivity: 0.92; specificity: 0.88)            |
| 3  | ZNF790           | Zinc finger protein 790                                                         | chr7  | 149 171 980 | Exon 7   | C    | T            | SNV                        | missense                      | 0.571 | NM_152557      | C1424G>A         | p.Cys475Tyr       | Deleterious (score: 0.02) | benign with a score of 0.411 (sensitivity: 0.89; specificity: 0.90)            |
| 3  | ZNHIT6           | Zinc finger, HIT type 6                                                         | chr19 | 37 314 190  | Exon 4   | G    | T            | SNV                        | missense                      | 0.395 | NM_206894      | C226C>A          | p.Pro676Ile       | Deleterious (score: 0)    | benign with a score of 0.099 (sensitivity: 0.93; specificity: 0.85)            |
| 3  | ZNHIT6           | Zinc finger, HIT type 6                                                         | chr1  | 86 144 456  | Exon 7   | T    | C            | SNV                        | missense                      | 0.457 | NM_017953      | C1097A>G         | p.Asp386Gly       | Deleterious (score: 0.02) | benign with a score of 0.007 (sensitivity: 0.96; specificity: 0.75)            |

# Supplemental\_Table\_2

| Ref Seq  | Exon   | chrom | start(-20 nt) | end(+20 nt) | intervalle (+/-20nt)    | size (+/-20nt) | start    | end      | intervalle (strict)     | size | details                           | transcript                      | coverage (%) |
|----------|--------|-------|---------------|-------------|-------------------------|----------------|----------|----------|-------------------------|------|-----------------------------------|---------------------------------|--------------|
| ADAMTSL1 | exon1  | chr9  | 18474210      | 18474313    | chr9:18474210-18474313  | 104            | 18474230 | 18474293 | chr9:18474230-18474293  | 64   | refseq ADAMTSL1 isoform1 isoforrn | NM_001040272                    | 100,00       |
| ADAMTSL1 | exon2  | chr9  | 18504806      | 18504974    | chr9:18504806-18504974  | 169            | 18504826 | 18504954 | chr9:18504826-18504954  | 129  | refseq ADAMTSL1 isoform1 isoforrn | NM_001040272                    | 100,00       |
| ADAMTSL1 | exon3  | chr9  | 18533224      | 18533310    | chr9:18533224-18533310  | 87             | 18533244 | 18533290 | chr9:18533244-18533290  | 47   | refseq ADAMTSL1 isoform1 isoforrn | NM_001040272                    | 100,00       |
| ADAMTSL1 | exon4  | chr9  | 18574007      | 18574284    | chr9:18574007-18574284  | 278            | 18574027 | 18574264 | chr9:18574027-18574264  | 238  | refseq ADAMTSL1 isoform1 isoforrn | NM_001040272                    | 100,00       |
| ADAMTSL1 | exon5  | chr9  | 18622220      | 18622387    | chr9:18622220-18622387  | 168            | 18622240 | 18622367 | chr9:18622240-18622367  | 128  | refseq ADAMTSL1 isoform1 isoforrn | NM_001040272                    | 100,00       |
| ADAMTSL1 | exon6  | chr9  | 18635920      | 18636035    | chr9:18635920-18636035  | 116            | 18635940 | 18636015 | chr9:18635940-18636015  | 76   | refseq ADAMTSL1 isoform1 isoforrn | NM_001040272                    | 100,00       |
| ADAMTSL1 | exon7  | chr9  | 18639231      | 18639429    | chr9:18639231-18639429  | 199            | 18639251 | 18639409 | chr9:18639251-18639409  | 159  | refseq ADAMTSL1 isoform1 isoforrn | NM_001040272                    | 100,00       |
| ADAMTSL1 | exon8  | chr9  | 18657616      | 18657768    | chr9:18657616-18657768  | 153            | 18657636 | 18657748 | chr9:18657636-18657748  | 113  | refseq ADAMTSL1 isoform1 isoforrn | NM_001040272                    | 100,00       |
| ADAMTSL1 | exon9  | chr9  | 18661912      | 18662091    | chr9:18661912-18662091  | 180            | 18661932 | 18662071 | chr9:18661932-18662071  | 140  | refseq ADAMTSL1 isoform1 isoforrn | NM_001040272                    | 100,00       |
| ADAMTSL1 | exon10 | chr9  | 18675834      | 18675925    | chr9:18675834-18675925  | 92             | 18675854 | 18675905 | chr9:18675854-18675905  | 52   | refseq ADAMTSL1 isoform1 isoforrn | NM_001040272                    | 100,00       |
| ADAMTSL1 | exon11 | chr9  | 18680289      | 18680534    | chr9:18680289-18680534  | 246            | 18680309 | 18680514 | chr9:18680309-18680514  | 206  | refseq ADAMTSL1 isoform1 isoforrn | NM_001040272                    | 100,00       |
| ADAMTSL1 | exon12 | chr9  | 18681789      | 18681977    | chr9:18681789-18681977  | 189            | 18681809 | 18681957 | chr9:18681809-18681957  | 149  | refseq ADAMTSL1 isoform1 isoforrn | NM_001040272                    | 100,00       |
| ADAMTSL1 | exon13 | chr9  | 18684693      | 18684822    | chr9:18684693-18684822  | 130            | 18684713 | 18684802 | chr9:18684713-18684802  | 90   | refseq ADAMTSL1 isoform1 isoforrn | NM_001040272                    | 100,00       |
| ADAMTSL1 | exon14 | chr9  | 18706724      | 18707066    | chr9:18706724-18707066  | 343            | 18706744 | 18707046 | chr9:18706744-18707046  | 303  | refseq ADAMTSL1 isoform2 :exon1   | NM_001040272                    | 100,00       |
| ADAMTSL1 | exon15 | chr9  | 18721513      | 18721683    | chr9:18721513-18721683  | 171            | 18721533 | 18721663 | chr9:18721533-18721663  | 131  | refseq ADAMTSL1 isoform2 :exon1   | NM_001040272                    | 100,00       |
| ADAMTSL1 | exon16 | chr9  | 18753275      | 18753526    | chr9:18753275-18753526  | 252            | 18753295 | 18753506 | chr9:18753295-18753506  | 212  | refseq ADAMTSL1 isoform2 :exon1   | NM_001040272                    | 100,00       |
| ADAMTSL1 | exon17 | chr9  | 18770579      | 18770799    | chr9:18770579-18770799  | 221            | 18770599 | 18770779 | chr9:18770599-18770779  | 181  | refseq ADAMTSL1 isoform2 :exon1   | NM_001040272                    | 100,00       |
| ADAMTSL1 | exon18 | chr9  | 18775720      | 18775914    | chr9:18775720-18775914  | 195            | 18775740 | 18775894 | chr9:18775740-18775894  | 155  | refseq ADAMTSL1 isoform2 :exon1   | NM_001040272                    | 100,00       |
| ADAMTSL1 | exon19 | chr9  | 18776758      | 18777924    | chr9:18776758-18777924  | 1167           | 18776778 | 18777904 | chr9:18776778-18777904  | 1127 | refseq ADAMTSL1 isoform2 :exon1   | NM_001040272                    | 100,00       |
| ADAMTSL1 | exon20 | chr9  | 18795374      | 18795542    | chr9:18795374-18795542  | 169            | 18795394 | 18795522 | chr9:18795394-18795522  | 129  | refseq ADAMTSL1 isoform2 :exon2   | NM_001040272                    | 100,00       |
| ADAMTSL1 | exon21 | chr9  | 18817086      | 18817255    | chr9:18817086-18817255  | 170            | 18817106 | 18817235 | chr9:18817106-18817235  | 130  | refseq ADAMTSL1 isoform2 :exon2   | NM_001040272                    | 100,00       |
| ADAMTSL1 | exon22 | chr9  | 18826261      | 18826481    | chr9:18826261-18826481  | 221            | 18826281 | 18826461 | chr9:18826281-18826461  | 181  | refseq ADAMTSL1 isoform2 :exon2   | NM_001040272                    | 100,00       |
| ADAMTSL1 | exon23 | chr9  | 18829820      | 18829995    | chr9:18829820-18829995  | 176            | 18829840 | 18829975 | chr9:18829840-18829975  | 136  | refseq ADAMTSL1 isoform2 :exon2   | NM_001040272                    | 100,00       |
| ADAMTSL1 | exon24 | chr9  | 18887808      | 18888061    | chr9:18887808-18888061  | 254            | 18887828 | 18888041 | chr9:18887828-18888041  | 214  | refseq ADAMTSL1 isoform2 :exon2   | NM_001040272                    | 100,00       |
| ADAMTSL1 | exon25 | chr9  | 18889545      | 18889766    | chr9:18889545-18889766  | 222            | 18889565 | 18889746 | chr9:18889565-18889746  | 182  | refseq ADAMTSL1 isoform2 :exon2   | NM_001040272                    | 100,00       |
| ADAMTSL1 | exon26 | chr9  | 18892366      | 18892614    | chr9:18892366-18892614  | 249            | 18892386 | 18892594 | chr9:18892386-18892594  | 209  | refseq ADAMTSL1 isoform2 :exon2   | NM_001040272                    | 100,00       |
| ADAMTSL1 | exon27 | chr9  | 18905759      | 18905909    | chr9:18905759-18905909  | 151            | 18905779 | 18905889 | chr9:18905779-18905889  | 111  | refseq ADAMTSL1 isoform2 :exon2   | NM_001040272                    | 100,00       |
| ADAMTSL1 | exon28 | chr9  | 18906669      | 18906930    | chr9:18906669-18906930  | 262            | 18906689 | 18906910 | chr9:18906689-18906910  | 222  | refseq ADAMTSL1 isoform2 :exon2   | NM_001040272                    | 100,00       |
| ADAMTSL1 | exon29 | chr9  | 18908419      | 18908656    | chr9:18908419-18908656  | 148            | 18908439 | 18908546 | chr9:18908439-18908546  | 108  | refseq ADAMTSL1 isoform2 :exon2   | NM_001040272                    | 100,00       |
| ADCV6    | exon21 | chr12 | 49162353      | 49162519    | chr12:49162353-49162519 | 167            | 49162373 | 49162499 | chr12:49162373-49162499 | 127  | refseq ADCV6 isoform1 isoforrn    | NM_015270, NM_020983            | 100,00       |
| ADCV6    | exon20 | chr12 | 49162699      | 49162864    | chr12:49162699-49162864 | 166            | 49162719 | 49162844 | chr12:49162719-49162844 | 126  | refseq ADCV6 isoform1 isoforrn    | NM_015270, NM_020983            | 100,00       |
| ADCV6    | exon19 | chr12 | 49164528      | 49164773    | chr12:49164528-49164773 | 246            | 49164548 | 49164753 | chr12:49164548-49164753 | 206  | refseq ADCV6 isoform1 isoforrn    | NM_015270, NM_020983            | 100,00       |
| ADCV6    | exon18 | chr12 | 49165472      | 49165776    | chr12:49165472-49165776 | 305            | 49165492 | 49165756 | chr12:49165492-49165756 | 265  | refseq ADCV6 isoform1 isoforrn    | NM_015270, NM_020983            | 100,00       |
| ADCV6    | exon17 | chr12 | 49166057      | 49166227    | chr12:49166057-49166227 | 171            | 49166077 | 49166207 | chr12:49166077-49166207 | 131  | refseq ADCV6 isoform1 isoforrn    | NM_015270, NM_020983            | 100,00       |
| ADCV6    | exon16 | chr12 | 49166270      | 49166346    | chr12:49166270-49166346 | 77             | 49166290 | 49166326 | chr12:49166290-49166326 | 37   | refseq ADCV6 isoform1 isoforrn    | NM_015270, NM_020983            | 100,00       |
| ADCV6    | exon15 | chr12 | 49167231      | 49167450    | chr12:49167231-49167450 | 220            | 49167251 | 49167430 | chr12:49167251-49167430 | 180  | refseq ADCV6 isoform1 isoforrn    | NM_015270, NM_020983            | 100,00       |
| ADCV6    | exon14 | chr12 | 49167702      | 49167901    | chr12:49167702-49167901 | 200            | 49167722 | 49167881 | chr12:49167722-49167881 | 160  | refseq ADCV6 isoform1 isoforrn    | NM_015270                       | 100,00       |
| ADCV6    | exon13 | chr12 | 49168164      | 49168321    | chr12:49168164-49168321 | 158            | 49168184 | 49168301 | chr12:49168184-49168301 | 118  | refseq ADCV6 isoform1 isoforrn    | NM_015270, NM_020983            | 100,00       |
| ADCV6    | exon12 | chr12 | 49168453      | 49168581    | chr12:49168453-49168581 | 129            | 49168473 | 49168651 | chr12:49168473-49168651 | 89   | refseq ADCV6 isoform1 isoforrn    | NM_015270, NM_020983            | 100,00       |
| ADCV6    | exon11 | chr12 | 49168719      | 49168857    | chr12:49168719-49168857 | 139            | 49168739 | 49168879 | chr12:49168739-49168879 | 99   | refseq ADCV6 isoform1 isoforrn    | NM_015270, NM_020983            | 100,00       |
| ADCV6    | exon10 | chr12 | 49169065      | 49169253    | chr12:49169065-49169253 | 189            | 49169085 | 49169233 | chr12:49169085-49169233 | 149  | refseq ADCV6 isoform1 isoforrn    | NM_015270, NM_020983            | 100,00       |
| ADCV6    | exon9  | chr12 | 49169435      | 49169501    | chr12:49169435-49169501 | 67             | 49169455 | 49169481 | chr12:49169455-49169481 | 27   | refseq ADCV6 isoform1 isoforrn    | NM_015270, NM_020983            | 100,00       |
| ADCV6    | exon8  | chr12 | 49169725      | 49169894    | chr12:49169725-49169894 | 170            | 49169745 | 49169874 | chr12:49169745-49169874 | 130  | refseq ADCV6 isoform1 isoforrn    | NM_015270, NM_020983            | 100,00       |
| ADCV6    | exon7  | chr12 | 49169971      | 49170153    | chr12:49169971-49170153 | 183            | 49169991 | 49170133 | chr12:49169991-49170133 | 143  | refseq ADCV6 isoform1 isoforrn    | NM_015270, NM_020983            | 100,00       |
| ADCV6    | exon6  | chr12 | 49170389      | 49170389    | chr12:49170389-49170389 | 200            | 49170369 | 49170369 | chr12:49170369-49170369 | 160  | refseq ADCV6 isoform1 isoforrn    | NM_015270, NM_020983            | 100,00       |
| ADCV6    | exon5  | chr12 | 49170866      | 49171034    | chr12:49170866-49171034 | 169            | 49170886 | 49171014 | chr12:49170886-49171014 | 129  | refseq ADCV6 isoform1 isoforrn    | NM_015270, NM_020983            | 100,00       |
| ADCV6    | exon4  | chr12 | 49171172      | 49171324    | chr12:49171172-49171324 | 153            | 49171192 | 49171304 | chr12:49171192-49171304 | 113  | refseq ADCV6 isoform1 isoforrn    | NM_015270, NM_020983            | 100,00       |
| ADCV6    | exon3  | chr12 | 49171539      | 49171737    | chr12:49171539-49171737 | 163            | 49171579 | 49171719 | chr12:49171579-49171719 | 123  | refseq ADCV6 isoform1 isoforrn    | NM_015270, NM_020983            | 100,00       |
| ADCV6    | exon2  | chr12 | 49171870      | 49172060    | chr12:49171870-49172060 | 191            | 49171890 | 49172040 | chr12:49171890-49172040 | 151  | refseq ADCV6 isoform1 isoforrn    | NM_015270, NM_020983            | 100,00       |
| ADCV6    | exon1  | chr12 | 49172337      | 49172737    | chr12:49172337-49172737 | 905            | 49172357 | 49172717 | chr12:49172357-49172717 | 865  | refseq ADCV6 isoform1 isoforrn    | NM_015270, NM_020983            | 100,00       |
| AEBP2    | exon1  | chr12 | 19592613      | 19593324    | chr12:19592613-19593324 | 712            | 19592633 | 19593304 | chr12:19592633-19593304 | 672  | refseq AEBP2 isoform1 isoforrn    | NM_01114176, NM_153207          | 29,46        |
| AEBP2    | exon1  | chr12 | 19593618      | 19593681    | chr12:19593618-19593681 | 64             | 19593638 | 19593664 | chr12:19593638-19593664 | 24   | refseq AEBP2 isoform3 :exon1 extn | NM_001267043                    | 100,00       |
| AEBP2    | exon2  | chr12 | 19615423      | 19615671    | chr12:19615423-19615671 | 249            | 19615443 | 19615651 | chr12:19615443-19615651 | 209  | refseq AEBP2 isoform1 isoforrn    | NM_01114176, NM_153207, NM_001  | 100,00       |
| AEBP2    | exon3  | chr12 | 19626161      | 19626309    | chr12:19626161-19626309 | 149            | 19626181 | 19626289 | chr12:19626181-19626289 | 109  | refseq AEBP2 isoform1 isoforrn    | NM_01114176, NM_153207, NM_001  | 100,00       |
| AEBP2    | exon4  | chr12 | 19646713      | 19646940    | chr12:19646713-19646940 | 228            | 19646733 | 19646920 | chr12:19646733-19646920 | 188  | refseq AEBP2 isoform1 isoforrn    | NM_01114176, NM_153207, NM_001  | 100,00       |
| AEBP2    | exon5  | chr12 | 19653010      | 19653175    | chr12:19653010-19653175 | 166            | 19653030 | 19653155 | chr12:19653030-19653155 | 126  | refseq AEBP2 isoform1 isoforrn    | NM_001114176, NM_153207, NM_001 | 100,00       |
| AEBP2    | exon6  | chr12 | 19665419      | 19665511</  |                         |                |          |          |                         |      |                                   |                                 |              |

|         |        |        |      |           |           |                          |      |           |           |                          |      |        |                                     |                                                           |        |
|---------|--------|--------|------|-----------|-----------|--------------------------|------|-----------|-----------|--------------------------|------|--------|-------------------------------------|-----------------------------------------------------------|--------|
| ARID1A  | exon6  | exon6  | chr1 | 27087854  | 27087984  | chr1:27087854-27087984   | 131  | 27087874  | 27087964  | chr1:27087874-27087964   | 91   | refseq | ARID1A( isoforme1 isoforme2)        | NM_139135, NM_006015                                      | 100,00 |
| ARID1A  | exon7  | exon7  | chr1 | 27088622  | 27088830  | chr1:27088622-27088830   | 209  | 27088642  | 27088810  | chr1:27088642-27088810   | 169  | refseq | ARID1A( isoforme1 isoforme2)        | NM_139135, NM_006015                                      | 100,00 |
| ARID1A  | exon8  | exon8  | chr1 | 27089443  | 27089796  | chr1:27089443-27089796   | 354  | 27089463  | 27089776  | chr1:27089463-27089776   | 314  | refseq | ARID1A( isoforme1 isoforme2)        | NM_139135, NM_006015                                      | 100,00 |
| ARID1A  | exon9  | exon9  | chr1 | 27092691  | 27092877  | chr1:27092691-27092877   | 187  | 27092711  | 27092857  | chr1:27092711-27092857   | 147  | refseq | ARID1A( isoforme1 isoforme2)        | NM_139135, NM_006015                                      | 100,00 |
| ARID1A  | exon10 | exon10 | chr1 | 27092927  | 27093077  | chr1:27092927-27093077   | 151  | 27092947  | 27093057  | chr1:27092947-27093057   | 111  | refseq | ARID1A( isoforme1 isoforme2)        | NM_139135, NM_006015                                      | 100,00 |
| ARID1A  | exon11 | exon11 | chr1 | 27094260  | 27094510  | chr1:27094260-27094510   | 251  | 27094280  | 27094490  | chr1:27094280-27094490   | 211  | refseq | ARID1A( isoforme1 isoforme2)        | NM_139135, NM_006015                                      | 100,00 |
| ARID1A  | exon12 | exon12 | chr1 | 27097589  | 27097837  | chr1:27097589-27097837   | 249  | 27097609  | 27097817  | chr1:27097609-27097817   | 209  | refseq | ARID1A( isoforme1 isoforme2)        | NM_139135, NM_006015                                      | 100,00 |
| ARID1A  | exon13 | exon13 | chr1 | 27098970  | 27099143  | chr1:27098970-27099143   | 174  | 27098990  | 27099123  | chr1:27098990-27099123   | 134  | refseq | ARID1A( isoforme1 isoforme2)        | NM_139135, NM_006015                                      | 100,00 |
| ARID1A  | exon14 | exon14 | chr1 | 27099282  | 27099498  | chr1:27099282-27099498   | 217  | 27099302  | 27099478  | chr1:27099302-27099478   | 177  | refseq | ARID1A( isoforme1 isoforme2)        | NM_139135, NM_006015                                      | 100,00 |
| ARID1A  | exon15 | exon15 | chr1 | 27099816  | 27100007  | chr1:27099816-27100007   | 192  | 27099836  | 27099987  | chr1:27099836-27099987   | 152  | refseq | ARID1A( isoforme1 isoforme2)        | NM_139135, NM_006015                                      | 100,00 |
| ARID1A  | exon16 | exon16 | chr1 | 27100050  | 27100228  | chr1:27100050-27100228   | 179  | 27100070  | 27100208  | chr1:27100070-27100208   | 139  | refseq | ARID1A( isoforme1 isoforme2)        | NM_139135, NM_006015                                      | 100,00 |
| ARID1A  | exon17 | exon17 | chr1 | 27100272  | 27100409  | chr1:27100272-27100409   | 138  | 27100292  | 27100389  | chr1:27100292-27100389   | 98   | refseq | ARID1A( isoforme1 isoforme2)        | NM_139135, NM_006015                                      | 100,00 |
| ARID1A  | exon18 | exon18 | chr1 | 27100799  | 27101731  | chr1:27100799-27101731   | 933  | 27100819  | 27101711  | chr1:27100819-27101711   | 893  | refseq | ARID1A( isoforme1 isoforme2):exon18 | e NM_006015                                               | 100,00 |
| ARID1A  | exon19 | exon19 | chr1 | 27102047  | 27102218  | chr1:27102047-27102218   | 172  | 27102067  | 27102198  | chr1:27102067-27102198   | 132  | refseq | ARID1A( isoforme1 isoforme2)        | NM_139135, NM_006015                                      | 100,00 |
| ARID1A  | exon20 | exon20 | chr1 | 27105493  | 27107267  | chr1:27105493-27107267   | 1775 | 27105513  | 27107247  | chr1:27105513-27107247   | 1735 | refseq | ARID1A( isoforme1 isoforme2)        | NM_139135, NM_006015                                      | 100,00 |
| ARID3A  | exon1  | chr19  |      | 929508    | 929916    | chr19:929508-929916      | 409  | 929528    | 929896    | chr19:929528-929896      | 369  | refseq | ARID3A( isoforme1):exon1            | exr NM_005224                                             | 91,87  |
| ARID3A  | exon2  | chr19  |      | 932397    | 932762    | chr19:932397-932762      | 366  | 932417    | 932742    | chr19:932417-932742      | 326  | refseq | ARID3A( isoforme1):exon2            | exr NM_005224                                             | 100,00 |
| ARID3A  | exon3  | chr19  |      | 960071    | 960184    | chr19:960071-960184      | 114  | 960091    | 960164    | chr19:960091-960164      | 74   | refseq | ARID3A( isoforme1):exon3            | exr NM_005224                                             | 100,00 |
| ARID3A  | exon4  | chr19  |      | 964227    | 964451    | chr19:964227-964451      | 225  | 964247    | 964431    | chr19:964247-964431      | 185  | refseq | ARID3A( isoforme1):exon4            | exr NM_005224                                             | 100,00 |
| ARID3A  | exon5  | chr19  |      | 964812    | 965100    | chr19:964812-965100      | 289  | 964832    | 965080    | chr19:964832-965080      | 249  | refseq | ARID3A( isoforme1):exon5            | exr NM_005224                                             | 100,00 |
| ARID3A  | exon6  | chr19  |      | 966551    | 966888    | chr19:966551-966888      | 338  | 966571    | 966868    | chr19:966571-966868      | 298  | refseq | ARID3A( isoforme1):exon6            | exr NM_005224                                             | 100,00 |
| ARID3A  | exon7  | chr19  |      | 968384    | 968523    | chr19:968384-968523      | 140  | 968404    | 968503    | chr19:968404-968503      | 100  | refseq | ARID3A( isoforme1):exon7            | exr NM_005224                                             | 100,00 |
| ARID3A  | exon8  | chr19  |      | 971857    | 972085    | chr19:971857-972085      | 229  | 971877    | 972065    | chr19:971877-972065      | 189  | refseq | ARID3A( isoforme1):exon8            | exr NM_005224                                             | 100,00 |
| ATP13A4 | exon30 | chr3   |      | 193120420 | 193120673 | chr3:193120420-193120673 | 254  | 193120440 | 193120653 | chr3:193120440-193120653 | 214  | refseq | ATP13A4( isoforme1):exon30          | NM_032279                                                 | 100,00 |
| ATP13A4 | exon29 | chr3   |      | 193125081 | 193125202 | chr3:193125081-193125202 | 122  | 193125101 | 193125182 | chr3:193125101-193125182 | 82   | refseq | ATP13A4( isoforme1):exon29          | NM_032279                                                 | 100,00 |
| ATP13A4 | exon28 | chr3   |      | 193128750 | 193128879 | chr3:193128750-193128879 | 130  | 193128770 | 193128859 | chr3:193128770-193128859 | 90   | refseq | ATP13A4( isoforme1):exon28          | NM_032279                                                 | 100,00 |
| ATP13A4 | exon27 | chr3   |      | 193129946 | 193130180 | chr3:193129946-193130180 | 235  | 193129966 | 193130160 | chr3:193129966-193130160 | 195  | refseq | ATP13A4( isoforme1):exon27          | NM_032279                                                 | 100,00 |
| ATP13A4 | exon26 | chr3   |      | 193132347 | 193132559 | chr3:193132347-193132559 | 213  | 193132367 | 193132539 | chr3:193132367-193132539 | 173  | refseq | ATP13A4( isoforme1):exon26          | NM_032279                                                 | 100,00 |
| ATP13A4 | exon25 | chr3   |      | 193151613 | 193151726 | chr3:193151613-193151726 | 114  | 193151633 | 193151706 | chr3:193151633-193151706 | 74   | refseq | ATP13A4( isoforme1):exon25          | NM_032279                                                 | 100,00 |
| ATP13A4 | exon24 | chr3   |      | 193153416 | 193153553 | chr3:193153416-193153553 | 138  | 193153436 | 193153533 | chr3:193153436-193153533 | 98   | refseq | ATP13A4( isoforme1):exon24          | NM_032279                                                 | 100,00 |
| ATP13A4 | exon23 | chr3   |      | 193156243 | 193156393 | chr3:193156243-193156393 | 151  | 193156263 | 193156373 | chr3:193156263-193156373 | 111  | refseq | ATP13A4( isoforme1):exon23          | NM_032279                                                 | 100,00 |
| ATP13A4 | exon22 | chr3   |      | 193156791 | 193156874 | chr3:193156791-193156874 | 84   | 193156811 | 193156854 | chr3:193156811-193156854 | 44   | refseq | ATP13A4( isoforme1):exon22          | NM_032279                                                 | 100,00 |
| ATP13A4 | exon21 | chr3   |      | 193158326 | 193158446 | chr3:193158326-193158446 | 121  | 193158346 | 193158426 | chr3:193158346-193158426 | 81   | refseq | ATP13A4( isoforme1):exon21          | NM_032279                                                 | 100,00 |
| ATP13A4 | exon20 | chr3   |      | 193159234 | 193159397 | chr3:193159234-193159397 | 164  | 193159254 | 193159377 | chr3:193159254-193159377 | 124  | refseq | ATP13A4( isoforme1):exon20          | NM_032279                                                 | 100,00 |
| ATP13A4 | exon19 | chr3   |      | 193160161 | 193160365 | chr3:193160161-193160365 | 205  | 193160181 | 193160345 | chr3:193160181-193160345 | 165  | refseq | ATP13A4( isoforme1):exon19          | NM_032279                                                 | 100,00 |
| ATP13A4 | exon18 | chr3   |      | 193165974 | 193166139 | chr3:193165974-193166139 | 166  | 193165994 | 193166119 | chr3:193165994-193166119 | 126  | refseq | ATP13A4( isoforme1):exon18          | NM_032279                                                 | 100,00 |
| ATP13A4 | exon17 | chr3   |      | 193171869 | 193172021 | chr3:193171869-193172021 | 153  | 193171889 | 193172001 | chr3:193171889-193172001 | 113  | refseq | ATP13A4( isoforme1):exon17          | NM_032279                                                 | 100,00 |
| ATP13A4 | exon16 | chr3   |      | 193174768 | 193174962 | chr3:193174768-193174962 | 195  | 193174788 | 193174942 | chr3:193174788-193174942 | 155  | refseq | ATP13A4( isoforme1):exon16          | NM_032279                                                 | 100,00 |
| ATP13A4 | exon15 | chr3   |      | 193175147 | 193175274 | chr3:193175147-193175274 | 128  | 193175167 | 193175254 | chr3:193175167-193175254 | 88   | refseq | ATP13A4( isoforme1):exon15          | NM_032279                                                 | 100,00 |
| ATP13A4 | exon14 | chr3   |      | 193176849 | 193177040 | chr3:193176849-193177040 | 192  | 193176869 | 193177020 | chr3:193176869-193177020 | 152  | refseq | ATP13A4( isoforme1):exon14          | NM_032279                                                 | 100,00 |
| ATP13A4 | exon13 | chr3   |      | 193180630 | 193180632 | chr3:193180630-193180632 | 103  | 193180550 | 193180612 | chr3:193180550-193180612 | 63   | refseq | ATP13A4( isoforme1):exon13          | NM_032279                                                 | 100,00 |
| ATP13A4 | exon12 | chr3   |      | 193182708 | 193182937 | chr3:193182708-193182937 | 230  | 193182728 | 193182917 | chr3:193182728-193182917 | 190  | refseq | ATP13A4( isoforme1):exon12          | NM_032279                                                 | 100,00 |
| ATP13A4 | exon11 | chr3   |      | 193183793 | 193183991 | chr3:193183793-193183991 | 199  | 193183813 | 193183971 | chr3:193183813-193183971 | 159  | refseq | ATP13A4( isoforme1):exon11          | NM_032279                                                 | 100,00 |
| ATP13A4 | exon10 | chr3   |      | 193185084 | 193185295 | chr3:193185084-193185295 | 212  | 193185104 | 193185275 | chr3:193185104-193185275 | 172  | refseq | ATP13A4( isoforme1):exon10          | NM_032279                                                 | 100,00 |
| ATP13A4 | exon9  | chr3   |      | 193188627 | 193188802 | chr3:193188627-193188802 | 176  | 193188742 | 193188782 | chr3:193188742-193188782 | 136  | refseq | ATP13A4( isoforme1):exon9           | e NM_032279                                               | 100,00 |
| ATP13A4 | exon8  | chr3   |      | 193201704 | 193201814 | chr3:193201704-193201814 | 111  | 193201724 | 193201794 | chr3:193201724-193201794 | 71   | refseq | ATP13A4( isoforme1):exon8           | e NM_032279                                               | 100,00 |
| ATP13A4 | exon7  | chr3   |      | 193207498 | 193207673 | chr3:193207498-193207673 | 176  | 193207518 | 193207653 | chr3:193207518-193207653 | 136  | refseq | ATP13A4( isoforme1):exon7           | e NM_032279                                               | 100,00 |
| ATP13A4 | exon6  | chr3   |      | 193209097 | 193209207 | chr3:193209097-193209207 | 111  | 193209117 | 193209187 | chr3:193209117-193209187 | 71   | refseq | ATP13A4( isoforme1):exon6           | e NM_032279                                               | 100,00 |
| ATP13A4 | exon5  | chr3   |      | 193210685 | 193210806 | chr3:193210685-193210806 | 122  | 193210705 | 193210786 | chr3:193210705-193210786 | 82   | refseq | ATP13A4( isoforme1):exon5           | e NM_032279                                               | 100,00 |
| ATP13A4 | exon4  | chr3   |      | 193210858 | 193210969 | chr3:193210858-193210969 | 112  | 193210878 | 193210949 | chr3:193210878-193210949 | 72   | refseq | ATP13A4( isoforme1):exon4           | e NM_032279                                               | 100,00 |
| ATP13A4 | exon3  | chr3   |      | 193220261 | 193220448 | chr3:193220261-193220448 | 188  | 193220281 | 193220428 | chr3:193220281-193220428 | 148  | refseq | ATP13A4( isoforme1):exon3           | e NM_032279                                               | 100,00 |
| ATP13A4 | exon2  | chr3   |      | 193232466 | 193232680 | chr3:193232466-193232680 | 215  | 193232486 | 193232660 | chr3:193232486-193232660 | 175  | refseq | ATP13A4( isoforme1):exon2           | e NM_032279                                               | 100,00 |
| ATP13A4 | exon1  | chr3   |      | 193272508 | 193272608 | chr3:193272508-193272608 | 101  | 193272528 | 193272588 | chr3:193272528-193272588 | 61   | refseq | ATP13A4( isoforme1):exon1           | e NM_032279                                               | 100,00 |
| BCOR    | exon14 | exon1  | chrX | 39911341  | 39911673  | chrX:39911341-39911673   | 333  | 39911361  | 39911653  | chrX:39911361-39911653   | 293  | refseq | BCOR( isoforme1 isoforme2)          | is NM_001123383, NM_001123385, NM_001123388, NM_001123389 | 100,00 |
| BCOR    | exon13 | exon1  | chrX | 39913118  | 39913315  | chrX:39913118-39913315   | 198  | 39913138  | 39913295  | chrX:39913138-39913295   | 158  | refseq | BCOR( isoforme1 isoforme2)          | is NM_001123383, NM_001123385, NM_001123388, NM_001123389 | 100,00 |
| BCOR    | exon12 | exon1  | chrX | 39913488  | 39913606  | chrX:39913488-39913606   | 119  | 39913508  | 39913586  | chrX:39913508-39913586   | 79   | refseq | BCOR( isoforme1 isoforme2)          | is NM_001123383, NM_001123385, NM_001123388, NM_001123389 | 100,00 |
| BCOR    | exon11 | exon1  | chrX | 39914600  | 39914786  | chrX:39914600-39914786   | 187  | 39914620  | 39914766  | chrX:39914620-39914766   | 147  | refseq | BCOR( isoforme1 isoforme2)          | is NM_001123383, NM_001123385, NM_001123388, NM_001123389 | 100,00 |
| BCOR    | exon10 | exon1  | chrX | 39916387  | 39916594  | chrX:39916387-39916594   | 208  | 39916407  | 39916574  | chrX:39916407-39916574   | 168  | refseq | BCOR( isoforme1 isoforme2)          | is NM_001123383, NM_001123385, NM_001123388, NM_001123389 | 100,00 |
| BCOR    | exon9  | exon9  | chrX | 39921371  | 39921666  | chrX:39921371-39921666   | 296  | 3992139   |           |                          |      |        |                                     |                                                           |        |

|        |              |       |           |           |                           |      |           |           |                           |      |                                                |                         |        |
|--------|--------------|-------|-----------|-----------|---------------------------|------|-----------|-----------|---------------------------|------|------------------------------------------------|-------------------------|--------|
| CREBBP | exon15 exon1 | chr16 | 3817700   | 3817930   | chr16:3817700-3817930     | 231  | 3817720   | 3817910   | chr16:3817720-3817910     | 191  | refseq CREBBP isoforme1 isoforme2              | NM_001079846, NM_004380 | 100,00 |
| CREBBP | exon14 exon1 | chr16 | 3819154   | 3819374   | chr16:3819154-3819374     | 221  | 3819174   | 3819354   | chr16:3819174-3819354     | 181  | refseq CREBBP isoforme1 isoforme2              | NM_001079846, NM_004380 | 100,00 |
| CREBBP | exon13 exon1 | chr16 | 3820550   | 3821007   | chr16:3820550-3821007     | 458  | 3820570   | 3820987   | chr16:3820570-3820987     | 418  | refseq CREBBP isoforme1 isoforme2              | NM_001079846, NM_004380 | 100,00 |
| CREBBP | exon12 exon1 | chr16 | 3823731   | 3823951   | chr16:3823731-3823951     | 221  | 3823751   | 3823931   | chr16:3823751-3823931     | 181  | refseq CREBBP isoforme1 isoforme2              | NM_001079846, NM_004380 | 100,00 |
| CREBBP | exon11 exon1 | chr16 | 3824549   | 3824714   | chr16:3824549-3824714     | 166  | 3824569   | 3824694   | chr16:3824569-3824694     | 126  | refseq CREBBP isoforme1 isoforme2              | NM_001079846, NM_004380 | 100,00 |
| CREBBP | exon10 exon1 | chr16 | 3827593   | 3827678   | chr16:3827593-3827678     | 86   | 3827613   | 3827658   | chr16:3827613-3827658     | 46   | refseq CREBBP isoforme1 isoforme2              | NM_001079846, NM_004380 | 100,00 |
| CREBBP | exon9 exon10 | chr16 | 3827991   | 3828203   | chr16:3827991-3828203     | 213  | 3828011   | 3828183   | chr16:3828011-3828183     | 173  | refseq CREBBP isoforme1 isoforme2              | NM_001079846, NM_004380 | 100,00 |
| CREBBP | exon8 exon9  | chr16 | 3828680   | 3828838   | chr16:3828680-3828838     | 159  | 3828700   | 3828818   | chr16:3828700-3828818     | 119  | refseq CREBBP isoforme1 isoforme2              | NM_001079846, NM_004380 | 100,00 |
| CREBBP | exon7 exon8  | chr16 | 3830712   | 3830899   | chr16:3830712-3830899     | 188  | 3830732   | 3830879   | chr16:3830732-3830879     | 148  | refseq CREBBP isoforme1 isoforme2              | NM_001079846, NM_004380 | 100,00 |
| CREBBP | exon6 exon7  | chr16 | 3831184   | 3831327   | chr16:3831184-3831327     | 144  | 3831204   | 3831307   | chr16:3831204-3831307     | 104  | refseq CREBBP isoforme1 isoforme2              | NM_001079846, NM_004380 | 100,00 |
| CREBBP | exon5 exon6  | chr16 | 3832664   | 3832947   | chr16:3832664-3832947     | 284  | 3832684   | 3832927   | chr16:3832684-3832927     | 244  | refseq CREBBP isoforme1 isoforme2              | NM_001079846, NM_004380 | 100,00 |
| CREBBP | exon5        | chr16 | 3841961   | 3842115   | chr16:3841961-3842115     | 155  | 3841981   | 3842095   | chr16:3841981-3842095     | 115  | refseq CREBBP isoforme2:exon5 ex NM_004380     |                         | 100,00 |
| CREBBP | exon4 exon4  | chr16 | 3843366   | 3843647   | chr16:3843366-3843647     | 282  | 3843386   | 3843627   | chr16:3843386-3843627     | 242  | refseq CREBBP isoforme1 isoforme2              | NM_001079846, NM_004380 | 100,00 |
| CREBBP | exon3 exon3  | chr16 | 3860583   | 3860800   | chr16:3860583-3860800     | 218  | 3860603   | 3860780   | chr16:3860603-3860780     | 178  | refseq CREBBP isoforme1 isoforme2              | NM_001079846, NM_004380 | 100,00 |
| CREBBP | exon2 exon2  | chr16 | 3900277   | 3901030   | chr16:3900277-3901030     | 754  | 3900297   | 3901010   | chr16:3900297-3901010     | 714  | refseq CREBBP isoforme1 isoforme2              | NM_001079846, NM_004380 | 100,00 |
| CUX2   | exon1        | chr12 | 111471961 | 111472064 | chr12:111471961-111472064 | 104  | 111471981 | 111472044 | chr12:111471981-111472044 | 64   | refseq CUX2 isoforme1:exon1 exte NM_015267     |                         | 100,00 |
| CUX2   | exon2        | chr12 | 111651983 | 111652134 | chr12:111651983-111652134 | 152  | 111652003 | 111652114 | chr12:111652003-111652114 | 112  | refseq CUX2 isoforme1:exon2 exte NM_015267     |                         | 100,00 |
| CUX2   | exon3        | chr12 | 111655673 | 111655761 | chr12:111655673-111655761 | 89   | 111655693 | 111655741 | chr12:111655693-111655741 | 49   | refseq CUX2 isoforme1:exon3 exte NM_015267     |                         | 100,00 |
| CUX2   | exon4        | chr12 | 111701544 | 111701663 | chr12:111701544-111701663 | 120  | 111701564 | 111701643 | chr12:111701564-111701643 | 80   | refseq CUX2 isoforme1:exon4 exte NM_015267     |                         | 100,00 |
| CUX2   | exon5        | chr12 | 111729201 | 111729376 | chr12:111729201-111729376 | 176  | 111729221 | 111729356 | chr12:111729221-111729356 | 136  | refseq CUX2 isoforme1:exon5 exte NM_015267     |                         | 100,00 |
| CUX2   | exon6        | chr12 | 111731229 | 111731393 | chr12:111731229-111731393 | 165  | 111731249 | 111731373 | chr12:111731249-111731373 | 125  | refseq CUX2 isoforme1:exon6 exte NM_015267     |                         | 100,00 |
| CUX2   | exon7        | chr12 | 111733116 | 111733233 | chr12:111733116-111733233 | 118  | 111733136 | 111733213 | chr12:111733136-111733213 | 78   | refseq CUX2 isoforme1:exon7 exte NM_015267     |                         | 100,00 |
| CUX2   | exon8        | chr12 | 111734256 | 111734363 | chr12:111734256-111734363 | 108  | 111734276 | 111734343 | chr12:111734276-111734343 | 68   | refseq CUX2 isoforme1:exon8 exte NM_015267     |                         | 100,00 |
| CUX2   | exon9        | chr12 | 111736324 | 111736413 | chr12:111736324-111736413 | 90   | 111736344 | 111736393 | chr12:111736344-111736393 | 50   | refseq CUX2 isoforme1:exon9 exte NM_015267     |                         | 100,00 |
| CUX2   | exon10       | chr12 | 111741993 | 111742138 | chr12:111741993-111742138 | 146  | 111742013 | 111742118 | chr12:111742013-111742118 | 106  | refseq CUX2 isoforme1:exon10 exte NM_015267    |                         | 100,00 |
| CUX2   | exon11       | chr12 | 111744704 | 111744936 | chr12:111744704-111744936 | 233  | 111744724 | 111744916 | chr12:111744724-111744916 | 193  | refseq CUX2 isoforme1:exon11 exte NM_015267    |                         | 100,00 |
| CUX2   | exon12       | chr12 | 111744982 | 111745081 | chr12:111744982-111745081 | 100  | 111745002 | 111745061 | chr12:111745002-111745061 | 60   | refseq CUX2 isoforme1:exon12 exte NM_015267    |                         | 100,00 |
| CUX2   | exon13       | chr12 | 111746068 | 111746157 | chr12:111746068-111746157 | 90   | 111746088 | 111746137 | chr12:111746088-111746137 | 50   | refseq CUX2 isoforme1:exon13 exte NM_015267    |                         | 100,00 |
| CUX2   | exon14       | chr12 | 111746210 | 111746350 | chr12:111746210-111746350 | 141  | 111746230 | 111746330 | chr12:111746230-111746330 | 101  | refseq CUX2 isoforme1:exon14 exte NM_015267    |                         | 100,00 |
| CUX2   | exon15       | chr12 | 111747824 | 111748506 | chr12:111747824-111748506 | 683  | 111747844 | 111748486 | chr12:111747844-111748486 | 643  | refseq CUX2 isoforme1:exon15 exte NM_015267    |                         | 100,00 |
| CUX2   | exon16       | chr12 | 111749883 | 111750025 | chr12:111749883-111750025 | 143  | 111749903 | 111750005 | chr12:111749903-111750005 | 103  | refseq CUX2 isoforme1:exon16 exte NM_015267    |                         | 100,00 |
| CUX2   | exon17       | chr12 | 111757795 | 111758599 | chr12:111757795-111758599 | 805  | 111757815 | 111758579 | chr12:111757815-111758579 | 765  | refseq CUX2 isoforme1:exon17 exte NM_015267    |                         | 100,00 |
| CUX2   | exon18       | chr12 | 111760204 | 111760404 | chr12:111760204-111760404 | 201  | 111760224 | 111760384 | chr12:111760224-111760384 | 161  | refseq CUX2 isoforme1:exon18 exte NM_015267    |                         | 100,00 |
| CUX2   | exon19       | chr12 | 111772224 | 111772534 | chr12:111772224-111772534 | 311  | 111772244 | 111772514 | chr12:111772244-111772514 | 271  | refseq CUX2 isoforme1:exon19 exte NM_015267    |                         | 100,00 |
| CUX2   | exon20       | chr12 | 111776069 | 111776298 | chr12:111776069-111776298 | 230  | 111776089 | 111776278 | chr12:111776089-111776278 | 190  | refseq CUX2 isoforme1:exon20 exte NM_015267    |                         | 100,00 |
| CUX2   | exon21       | chr12 | 111779563 | 111779877 | chr12:111779563-111779877 | 315  | 111779583 | 111779857 | chr12:111779583-111779857 | 275  | refseq CUX2 isoforme1:exon21 exte NM_015267    |                         | 100,00 |
| CUX2   | exon22       | chr12 | 111785307 | 111786149 | chr12:111785307-111786149 | 843  | 111785327 | 111786129 | chr12:111785327-111786129 | 803  | refseq CUX2 isoforme1:exon22 exte NM_015267    |                         | 100,00 |
| CXCR4  | exon1        | chr2  | 136872418 | 136873529 | chr2:136872418-136873529  | 1112 | 136872438 | 136873509 | chr2:136872438-136873509  | 1072 | refseq CXCR4 isoforme2:exon1 exte NM_001008540 |                         | 100,00 |
| CXCR4  | exon1        | chr2  | 136875595 | 136875650 | chr2:136875595-136875650  | 56   | 136875615 | 136875630 | chr2:136875615-136875630  | 16   | refseq CXCR4 isoforme1:exon1 exte NM_003467    |                         | 100,00 |
| DCDC1  | exon7        | chr11 | 31284589  | 31284640  | chr11:31284589-31284640   | 52   | 31284609  | 31284620  | chr11:31284609-31284620   | 12   | refseq DCDC1 isoforme1:exon7 exte NM_181807    |                         | 100,00 |
| DCDC1  | exon6        | chr11 | 31287033  | 31287167  | chr11:31287033-31287167   | 135  | 31287053  | 31287147  | chr11:31287053-31287147   | 95   | refseq DCDC1 isoforme1:exon6 exte NM_181807    |                         | 100,00 |
| DCDC1  | exon5        | chr11 | 31312173  | 31312419  | chr11:31312173-31312419   | 247  | 31312193  | 31312399  | chr11:31312193-31312399   | 207  | refseq DCDC1 isoforme1:exon5 exte NM_181807    |                         | 100,00 |
| DCDC1  | exon4        | chr11 | 31327141  | 31327344  | chr11:31327141-31327344   | 204  | 31327161  | 31327324  | chr11:31327161-31327324   | 164  | refseq DCDC1 isoforme1:exon4 exte NM_181807    |                         | 100,00 |
| DCDC1  | exon3        | chr11 | 31327758  | 31327955  | chr11:31327758-31327955   | 198  | 31327778  | 31327935  | chr11:31327778-31327935   | 158  | refseq DCDC1 isoforme1:exon3 exte NM_181807    |                         | 100,00 |
| DCDC1  | exon2        | chr11 | 31329165  | 31329475  | chr11:31329165-31329475   | 311  | 31329185  | 31329455  | chr11:31329185-31329455   | 271  | refseq DCDC1 isoforme1:exon2 exte NM_181807    |                         | 100,00 |
| DCDC1  | exon1        | chr11 | 31349643  | 31349847  | chr11:31349643-31349847   | 205  | 31349663  | 31349827  | chr11:31349663-31349827   | 165  | refseq DCDC1 isoforme1:exon1 exte NM_181807    |                         | 100,00 |
| DGKI   | exon22       | chr7  | 137178508 | 137178602 | chr7:137178508-137178602  | 95   | 137178528 | 137178582 | chr7:137178528-137178582  | 55   | refseq DGKI isoforme1:exon22 exte NM_004717    |                         | 0,00   |
| DGKI   | exon1        | chr7  | 137531187 | 137531628 | chr7:137531187-137531628  | 442  | 137531207 | 137531608 | chr7:137531207-137531608  | 402  | refseq DGKI isoforme1:exon1 exte NM_004717     |                         | 53,73  |
| DGKI   | exon34       | chr7  | 137075945 | 137076102 | chr7:137075945-137076102  | 158  | 137075965 | 137076082 | chr7:137075965-137076082  | 118  | refseq DGKI isoforme1:exon34 exte NM_004717    |                         | 100,00 |
| DGKI   | exon33       | chr7  | 137080323 | 137080463 | chr7:137080323-137080463  | 141  | 137080343 | 137080443 | chr7:137080343-137080443  | 101  | refseq DGKI isoforme1:exon33 exte NM_004717    |                         | 100,00 |
| DGKI   | exon32       | chr7  | 137082102 | 137082179 | chr7:137082102-137082179  | 78   | 137082122 | 137082159 | chr7:137082122-137082159  | 38   | refseq DGKI isoforme1:exon32 exte NM_004717    |                         | 100,00 |
| DGKI   | exon31       | chr7  | 137092600 | 137092761 | chr7:137092600-137092761  | 162  | 137092620 | 137092741 | chr7:137092620-137092741  | 122  | refseq DGKI isoforme1:exon31 exte NM_004717    |                         | 100,00 |
| DGKI   | exon30       | chr7  | 137096895 | 137096973 | chr7:137096895-137096973  | 79   | 137096915 | 137096953 | chr7:137096915-137096953  | 39   | refseq DGKI isoforme1:exon30 exte NM_004717    |                         | 100,00 |
| DGKI   | exon29       | chr7  | 137128802 | 137128868 | chr7:137128802-137128868  | 67   | 137128822 | 137128848 | chr7:137128822-137128848  | 27   | refseq DGKI isoforme1:exon29 exte NM_004717    |                         | 100,00 |
| DGKI   | exon28       | chr7  | 137148214 | 137148377 | chr7:137148214-137148377  | 164  | 137148234 | 137148357 | chr7:137148234-137148357  | 124  | refseq DGKI isoforme1:exon28 exte NM_004717    |                         | 100,00 |
| DGKI   | exon27       | chr7  | 137150633 | 137150801 | chr7:137150633-137150801  | 169  | 137150653 | 137150781 | chr7:137150653-137150781  | 129  | refseq DGKI isoforme1:exon27 exte NM_004717    |                         | 100,00 |
| DGKI   | exon26       | chr7  | 137151627 | 137151678 | chr7:137151627-137151678  | 52   | 137151647 | 137151658 | chr7:137151647-137151658  | 12   | refseq DGKI isoforme1:exon26 exte NM_004717    |                         | 100,00 |
| DGKI   | exon25       | chr7  | 137154275 | 137154385 | chr7:137154275-137154385  | 111  | 137154295 | 137154365 | chr7:137154295-137154365  | 71   | refseq DGKI isoforme1:exon25 exte NM_004717    |                         | 100,00 |
| DGKI   | exon24       | chr7  | 137170099 | 137170184 | chr7:137170099-137170184  | 86   | 137170119 | 137170164 | chr7:137170119-137170164  | 46   | refseq DGKI isoforme1:exon24 exte NM_004717    |                         | 100,00 |
| DGKI   | exon23       | chr7  | 137172335 | 137172455 | chr7:137172335-137172455  | 121  | 137172355 | 137172435 | chr7:137172355-137172435  | 81   | refseq DGKI isoforme1:exon23 exte NM_004717    |                         | 100,00 |
| DGKI   | exon21       | chr7  | 137206591 | 137206732 | chr7:137206591-137206732  | 142  | 137206611 | 137206712 | chr7:137206611-137206712  | 102  | refseq DGKI isoforme1:exon21 exte NM_004717    |                         | 100,00 |
| DGKI   | exon20       | chr7  | 137237334 | 137237394 | chr7:137237334-137237394  | 241  | 137237114 | 137237314 | chr7:137237114-137237314  | 201  | refseq DGKI isoforme1:exon20 exte NM_004717    |                         | 100,00 |
| DGKI   | exon19       | chr7  | 137255900 |           |                           |      |           |           |                           |      |                                                |                         |        |

|       |        |      |           |           |                          |     |           |           |                          |     |                                             |        |
|-------|--------|------|-----------|-----------|--------------------------|-----|-----------|-----------|--------------------------|-----|---------------------------------------------|--------|
| DNAH5 | exon21 | chr5 | 13882816  | 13882944  | chr5:13882816-13882944   | 129 | 13882836  | 13882924  | chr5:13882836-13882924   | 89  | refseq DNAH5( isoforme1):exon21 e:NM_001369 | 100,00 |
| DNAH5 | exon20 | chr5 | 13882992  | 13883223  | chr5:13882992-13883223   | 232 | 13883012  | 13883203  | chr5:13883012-13883203   | 192 | refseq DNAH5( isoforme1):exon20 e:NM_001369 | 100,00 |
| DNAH5 | exon19 | chr5 | 13885077  | 13885357  | chr5:13885077-13885357   | 281 | 13885097  | 13885337  | chr5:13885097-13885337   | 241 | refseq DNAH5( isoforme1):exon19 e:NM_001369 | 100,00 |
| DNAH5 | exon18 | chr5 | 13886052  | 13886258  | chr5:13886052-13886258   | 207 | 13886072  | 13886238  | chr5:13886072-13886238   | 167 | refseq DNAH5( isoforme1):exon18 e:NM_001369 | 100,00 |
| DNAH5 | exon17 | chr5 | 13891064  | 13891250  | chr5:13891064-13891250   | 187 | 13891084  | 13891230  | chr5:13891084-13891230   | 147 | refseq DNAH5( isoforme1):exon17 e:NM_001369 | 100,00 |
| DNAH5 | exon16 | chr5 | 13894738  | 13894950  | chr5:13894738-13894950   | 213 | 13894758  | 13894930  | chr5:13894758-13894930   | 173 | refseq DNAH5( isoforme1):exon16 e:NM_001369 | 100,00 |
| DNAH5 | exon15 | chr5 | 13900294  | 13900541  | chr5:13900294-13900541   | 248 | 13900314  | 13900521  | chr5:13900314-13900521   | 208 | refseq DNAH5( isoforme1):exon15 e:NM_001369 | 100,00 |
| DNAH5 | exon14 | chr5 | 13901340  | 13901702  | chr5:13901340-13901702   | 363 | 13901360  | 13901682  | chr5:13901360-13901682   | 323 | refseq DNAH5( isoforme1):exon14 e:NM_001369 | 100,00 |
| DNAH5 | exon13 | chr5 | 13902141  | 13902267  | chr5:13902141-13902267   | 127 | 13902161  | 13902217  | chr5:13902161-13902217   | 87  | refseq DNAH5( isoforme1):exon13 e:NM_001369 | 100,00 |
| DNAH5 | exon12 | chr5 | 13911474  | 13911622  | chr5:13911474-13911622   | 149 | 13911494  | 13911602  | chr5:13911494-13911602   | 109 | refseq DNAH5( isoforme1):exon12 e:NM_001369 | 100,00 |
| DNAH5 | exon11 | chr5 | 13913831  | 13914087  | chr5:13913831-13914087   | 257 | 13913851  | 13914067  | chr5:13913851-13914067   | 217 | refseq DNAH5( isoforme1):exon11 e:NM_001369 | 100,00 |
| DNAH5 | exon10 | chr5 | 13914608  | 13914771  | chr5:13914608-13914771   | 164 | 13914628  | 13914751  | chr5:13914628-13914751   | 124 | refseq DNAH5( isoforme1):exon10 e:NM_001369 | 100,00 |
| DNAH5 | exon9  | chr5 | 13916436  | 13916584  | chr5:13916436-13916584   | 149 | 13916456  | 13916564  | chr5:13916456-13916564   | 109 | refseq DNAH5( isoforme1):exon9 e:NM_001369  | 100,00 |
| DNAH5 | exon8  | chr5 | 13917231  | 13917385  | chr5:13917231-13917385   | 155 | 13917251  | 13917365  | chr5:13917251-13917365   | 115 | refseq DNAH5( isoforme1):exon8 e:NM_001369  | 100,00 |
| DNAH5 | exon7  | chr5 | 13919264  | 13919481  | chr5:13919264-13919481   | 218 | 13919284  | 13919461  | chr5:13919284-13919461   | 178 | refseq DNAH5( isoforme1):exon7 e:NM_001369  | 100,00 |
| DNAH5 | exon6  | chr5 | 13920568  | 13920746  | chr5:13920568-13920746   | 179 | 13920588  | 13920726  | chr5:13920588-13920726   | 139 | refseq DNAH5( isoforme1):exon6 e:NM_001369  | 100,00 |
| DNAH5 | exon5  | chr5 | 13922195  | 13922457  | chr5:13922195-13922457   | 263 | 13922215  | 13922437  | chr5:13922215-13922437   | 223 | refseq DNAH5( isoforme1):exon5 e:NM_001369  | 100,00 |
| DNAH5 | exon4  | chr5 | 13923368  | 13923569  | chr5:13923368-13923569   | 202 | 13923388  | 13923549  | chr5:13923388-13923549   | 162 | refseq DNAH5( isoforme1):exon4 e:NM_001369  | 100,00 |
| DNAH5 | exon3  | chr5 | 13928182  | 13928307  | chr5:13928182-13928307   | 126 | 13928202  | 13928287  | chr5:13928202-13928287   | 86  | refseq DNAH5( isoforme1):exon3 e:NM_001369  | 100,00 |
| DNAH5 | exon2  | chr5 | 13931198  | 13931373  | chr5:13931198-13931373   | 176 | 13931218  | 13931353  | chr5:13931218-13931353   | 136 | refseq DNAH5( isoforme1):exon2 e:NM_001369  | 100,00 |
| DNAH5 | exon1  | chr5 | 13944470  | 13944567  | chr5:13944470-13944567   | 98  | 13944490  | 13944547  | chr5:13944490-13944547   | 58  | refseq DNAH5( isoforme1):exon1 e:NM_001369  | 100,00 |
| DNAH7 | exon65 | chr2 | 196602624 | 196602871 | chr2:196602624-196602871 | 248 | 196602644 | 196602851 | chr2:196602644-196602851 | 208 | refseq DNAH7( isoforme1):exon65 e:NM_018897 | 100,00 |
| DNAH7 | exon64 | chr2 | 196605469 | 196605613 | chr2:196605469-196605613 | 145 | 196605489 | 196605593 | chr2:196605489-196605593 | 105 | refseq DNAH7( isoforme1):exon64 e:NM_018897 | 100,00 |
| DNAH7 | exon63 | chr2 | 196619040 | 196619258 | chr2:196619040-196619258 | 219 | 196619060 | 196619238 | chr2:196619060-196619238 | 179 | refseq DNAH7( isoforme1):exon63 e:NM_018897 | 100,00 |
| DNAH7 | exon62 | chr2 | 196620836 | 196621029 | chr2:196620836-196621029 | 194 | 196620856 | 196621009 | chr2:196620856-196621009 | 154 | refseq DNAH7( isoforme1):exon62 e:NM_018897 | 100,00 |
| DNAH7 | exon61 | chr2 | 196636363 | 196636634 | chr2:196636363-196636634 | 272 | 196636383 | 196636614 | chr2:196636383-196636614 | 232 | refseq DNAH7( isoforme1):exon61 e:NM_018897 | 100,00 |
| DNAH7 | exon60 | chr2 | 196640549 | 196640727 | chr2:196640549-196640727 | 179 | 196640569 | 196640707 | chr2:196640569-196640707 | 139 | refseq DNAH7( isoforme1):exon60 e:NM_018897 | 100,00 |
| DNAH7 | exon59 | chr2 | 196642503 | 196642729 | chr2:196642503-196642729 | 227 | 196642523 | 196642709 | chr2:196642523-196642709 | 187 | refseq DNAH7( isoforme1):exon59 e:NM_018897 | 100,00 |
| DNAH7 | exon58 | chr2 | 196651713 | 196651915 | chr2:196651713-196651915 | 203 | 196651733 | 196651895 | chr2:196651733-196651895 | 163 | refseq DNAH7( isoforme1):exon58 e:NM_018897 | 100,00 |
| DNAH7 | exon57 | chr2 | 196659041 | 196659282 | chr2:196659041-196659282 | 242 | 196659061 | 196659262 | chr2:196659061-196659262 | 202 | refseq DNAH7( isoforme1):exon57 e:NM_018897 | 100,00 |
| DNAH7 | exon56 | chr2 | 196661279 | 196661481 | chr2:196661279-196661481 | 203 | 196661299 | 196661461 | chr2:196661299-196661461 | 163 | refseq DNAH7( isoforme1):exon56 e:NM_018897 | 100,00 |
| DNAH7 | exon55 | chr2 | 196663999 | 196664216 | chr2:196663999-196664216 | 218 | 196664019 | 196664196 | chr2:196664019-196664196 | 178 | refseq DNAH7( isoforme1):exon55 e:NM_018897 | 100,00 |
| DNAH7 | exon54 | chr2 | 196671443 | 196671576 | chr2:196671443-196671576 | 134 | 196671463 | 196671556 | chr2:196671463-196671556 | 94  | refseq DNAH7( isoforme1):exon54 e:NM_018897 | 100,00 |
| DNAH7 | exon53 | chr2 | 196673385 | 196673620 | chr2:196673385-196673620 | 236 | 196673405 | 196673600 | chr2:196673405-196673600 | 196 | refseq DNAH7( isoforme1):exon53 e:NM_018897 | 100,00 |
| DNAH7 | exon52 | chr2 | 196674448 | 196674615 | chr2:196674448-196674615 | 168 | 196674468 | 196674595 | chr2:196674468-196674595 | 128 | refseq DNAH7( isoforme1):exon52 e:NM_018897 | 100,00 |
| DNAH7 | exon51 | chr2 | 196681331 | 196681707 | chr2:196681331-196681707 | 377 | 196681351 | 196681687 | chr2:196681351-196681687 | 337 | refseq DNAH7( isoforme1):exon51 e:NM_018897 | 100,00 |
| DNAH7 | exon50 | chr2 | 196682399 | 196682573 | chr2:196682399-196682573 | 175 | 196682419 | 196682553 | chr2:196682419-196682553 | 135 | refseq DNAH7( isoforme1):exon50 e:NM_018897 | 100,00 |
| DNAH7 | exon49 | chr2 | 196688958 | 196689189 | chr2:196688958-196689189 | 232 | 196688978 | 196689169 | chr2:196688978-196689169 | 192 | refseq DNAH7( isoforme1):exon49 e:NM_018897 | 100,00 |
| DNAH7 | exon48 | chr2 | 196698909 | 196699104 | chr2:196698909-196699104 | 196 | 196698929 | 196699084 | chr2:196698929-196699084 | 156 | refseq DNAH7( isoforme1):exon48 e:NM_018897 | 100,00 |
| DNAH7 | exon47 | chr2 | 196709705 | 196709909 | chr2:196709705-196709909 | 205 | 196709725 | 196709889 | chr2:196709725-196709889 | 165 | refseq DNAH7( isoforme1):exon47 e:NM_018897 | 100,00 |
| DNAH7 | exon46 | chr2 | 196718046 | 196718272 | chr2:196718046-196718272 | 227 | 196718066 | 196718252 | chr2:196718066-196718252 | 187 | refseq DNAH7( isoforme1):exon46 e:NM_018897 | 100,00 |
| DNAH7 | exon45 | chr2 | 196720514 | 196720735 | chr2:196720514-196720735 | 222 | 196720534 | 196720715 | chr2:196720534-196720715 | 182 | refseq DNAH7( isoforme1):exon45 e:NM_018897 | 100,00 |
| DNAH7 | exon44 | chr2 | 196722080 | 196722467 | chr2:196722080-196722467 | 388 | 196722100 | 196722447 | chr2:196722100-196722447 | 348 | refseq DNAH7( isoforme1):exon44 e:NM_018897 | 100,00 |
| DNAH7 | exon43 | chr2 | 196723177 | 196723548 | chr2:196723177-196723548 | 372 | 196723197 | 196723528 | chr2:196723197-196723528 | 332 | refseq DNAH7( isoforme1):exon43 e:NM_018897 | 100,00 |
| DNAH7 | exon42 | chr2 | 196726420 | 196726690 | chr2:196726420-196726690 | 271 | 196726440 | 196726670 | chr2:196726440-196726670 | 231 | refseq DNAH7( isoforme1):exon42 e:NM_018897 | 100,00 |
| DNAH7 | exon41 | chr2 | 196728852 | 196729765 | chr2:196728852-196729765 | 914 | 196728872 | 196729745 | chr2:196728872-196729745 | 874 | refseq DNAH7( isoforme1):exon41 e:NM_018897 | 100,00 |
| DNAH7 | exon40 | chr2 | 196736953 | 196737213 | chr2:196736953-196737213 | 261 | 196736973 | 196737193 | chr2:196736973-196737193 | 221 | refseq DNAH7( isoforme1):exon40 e:NM_018897 | 100,00 |
| DNAH7 | exon39 | chr2 | 196738271 | 196738438 | chr2:196738271-196738438 | 168 | 196738291 | 196738418 | chr2:196738291-196738418 | 128 | refseq DNAH7( isoforme1):exon39 e:NM_018897 | 100,00 |
| DNAH7 | exon38 | chr2 | 196740378 | 196740587 | chr2:196740378-196740587 | 210 | 196740398 | 196740567 | chr2:196740398-196740567 | 170 | refseq DNAH7( isoforme1):exon38 e:NM_018897 | 100,00 |
| DNAH7 | exon37 | chr2 | 196741247 | 196741443 | chr2:196741247-196741443 | 197 | 196741267 | 196741423 | chr2:196741267-196741423 | 157 | refseq DNAH7( isoforme1):exon37 e:NM_018897 | 100,00 |
| DNAH7 | exon36 | chr2 | 196746498 | 196746736 | chr2:196746498-196746736 | 239 | 196746518 | 196746716 | chr2:196746518-196746716 | 199 | refseq DNAH7( isoforme1):exon36 e:NM_018897 | 100,00 |
| DNAH7 | exon35 | chr2 | 196749288 | 196749553 | chr2:196749288-196749553 | 266 | 196749308 | 196749533 | chr2:196749308-196749533 | 226 | refseq DNAH7( isoforme1):exon35 e:NM_018897 | 100,00 |
| DNAH7 | exon34 | chr2 | 196750844 | 196751016 | chr2:196750844-196751016 | 173 | 196750864 | 196750996 | chr2:196750864-196750996 | 133 | refseq DNAH7( isoforme1):exon34 e:NM_018897 | 100,00 |
| DNAH7 | exon33 | chr2 | 196752961 | 196753178 | chr2:196752961-196753178 | 218 | 196752981 | 196753158 | chr2:196752981-196753158 | 178 | refseq DNAH7( isoforme1):exon33 e:NM_018897 | 100,00 |
| DNAH7 | exon32 | chr2 | 196753502 | 196753725 | chr2:196753502-196753725 | 224 | 196753522 | 196753705 | chr2:196753522-196753705 | 184 | refseq DNAH7( isoforme1):exon32 e:NM_018897 | 100,00 |
| DNAH7 | exon31 | chr2 | 196756358 | 196756548 | chr2:196756358-196756548 | 191 | 196756378 | 196756528 | chr2:196756378-196756528 | 151 | refseq DNAH7( isoforme1):exon31 e:NM_018897 | 100,00 |
| DNAH7 | exon30 | chr2 | 196759679 | 196759968 | chr2:196759679-196759968 | 290 | 196759699 | 196759948 | chr2:196759699-196759948 | 250 | refseq DNAH7( isoforme1):exon30 e:NM_018897 | 100,00 |
| DNAH7 | exon29 | chr2 | 196762370 | 196762509 | chr2:196762370-196762509 | 140 | 196762390 | 196762489 | chr2:196762390-196762489 | 100 | refseq DNAH7( isoforme1):exon29 e:NM_018897 | 100,00 |
| DNAH7 | exon28 | chr2 | 196764985 | 196765238 | chr2:196764985-196765238 | 254 | 196765005 | 196765218 | chr2:196765005-196765218 | 214 | refseq DNAH7( isoforme1):exon28 e:NM_018897 | 100,00 |
| DNAH7 | exon27 | chr2 | 196771362 | 196771530 | chr2:196771362-196771530 | 169 | 196771382 | 196771510 | chr2:196771382-196771510 | 129 | refseq DNAH7( isoforme1):exon27 e:NM_018897 | 100,00 |
| DNAH7 | exon26 | chr2 | 196771610 | 196771753 | chr2:196771610-196771753 | 144 | 196771630 | 196771733 | chr2:196771630-196771733 | 104 | refseq DNAH7( isoforme1):exon26 e:NM_018897 | 100,00 |
| DNAH7 | exon25 | chr2 | 196774730 | 196774939 | chr2:196774730-196774939 | 210 | 196774750 | 196774919 | chr2:196774750-196774919 | 170 | refseq DNAH7( isoforme1):exon25 e:NM_018897 | 100,00 |
| DNAH7 | exon24 | chr2 | 196786791 | 196786941 | chr2:196786791-196786941 | 151 | 196786811 | 196786921 | chr2:196786811-196786921 | 111 | refseq DNAH7( isoforme1):exon24 e:NM_018897 | 100,00 |
| DNAH7 | exon23 | chr2 | 196788298 | 196788551 | chr2:196788298-196788551 | 254 | 196788318 | 196788318 | chr2:19678               |     |                                             |        |

|       |        |        |          |          |                         |                      |          |          |                         |                      |                                                           |                                                           |        |
|-------|--------|--------|----------|----------|-------------------------|----------------------|----------|----------|-------------------------|----------------------|-----------------------------------------------------------|-----------------------------------------------------------|--------|
| DOCK6 | exon41 | chr19  | 11314736 | 11314791 | chr19:11314736-11314791 | 56                   | 11314756 | 11314771 | chr19:11314756-11314771 | 16                   | refseq DOCK6 (isoform1):exon41 exNM_020812                | 100,00                                                    |        |
| DOCK6 | exon40 | chr19  | 11314855 | 11315027 | chr19:11314855-11315027 | 173                  | 11314875 | 11315007 | chr19:11314875-11315007 | 133                  | refseq DOCK6 (isoform1):exon40 exNM_020812                | 100,00                                                    |        |
| DOCK6 | exon39 | chr19  | 11319341 | 11319525 | chr19:11319341-11319525 | 185                  | 11319361 | 11319505 | chr19:11319361-11319505 | 145                  | refseq DOCK6 (isoform1):exon39 exNM_020812                | 100,00                                                    |        |
| DOCK6 | exon38 | chr19  | 11319566 | 11319799 | chr19:11319566-11319799 | 234                  | 11319586 | 11319779 | chr19:11319586-11319779 | 194                  | refseq DOCK6 (isoform1):exon38 exNM_020812                | 100,00                                                    |        |
| DOCK6 | exon37 | chr19  | 11322431 | 11322572 | chr19:11322431-11322572 | 142                  | 11322451 | 11322552 | chr19:11322451-11322552 | 102                  | refseq DOCK6 (isoform1):exon37 exNM_020812                | 100,00                                                    |        |
| DOCK6 | exon36 | chr19  | 11322648 | 11322847 | chr19:11322648-11322847 | 200                  | 11322668 | 11322827 | chr19:11322668-11322827 | 160                  | refseq DOCK6 (isoform1):exon36 exNM_020812                | 100,00                                                    |        |
| DOCK6 | exon35 | chr19  | 11323831 | 11324024 | chr19:11323831-11324024 | 194                  | 11323851 | 11324004 | chr19:11323851-11324004 | 154                  | refseq DOCK6 (isoform1):exon35 exNM_020812                | 100,00                                                    |        |
| DOCK6 | exon34 | chr19  | 11324930 | 11325105 | chr19:11324930-11325105 | 176                  | 11324950 | 11325085 | chr19:11324950-11325085 | 136                  | refseq DOCK6 (isoform1):exon34 exNM_020812                | 100,00                                                    |        |
| DOCK6 | exon33 | chr19  | 11325208 | 11325345 | chr19:11325208-11325345 | 138                  | 11325228 | 11325325 | chr19:11325228-11325325 | 98                   | refseq DOCK6 (isoform1):exon33 exNM_020812                | 100,00                                                    |        |
| DOCK6 | exon32 | chr19  | 11326042 | 11326167 | chr19:11326042-11326167 | 126                  | 11326062 | 11326147 | chr19:11326062-11326147 | 86                   | refseq DOCK6 (isoform1):exon32 exNM_020812                | 100,00                                                    |        |
| DOCK6 | exon31 | chr19  | 11326456 | 11326623 | chr19:11326456-11326623 | 168                  | 11326476 | 11326603 | chr19:11326476-11326603 | 128                  | refseq DOCK6 (isoform1):exon31 exNM_020812                | 100,00                                                    |        |
| DOCK6 | exon30 | chr19  | 11327569 | 11327792 | chr19:11327569-11327792 | 224                  | 11327589 | 11327772 | chr19:11327589-11327772 | 184                  | refseq DOCK6 (isoform1):exon30 exNM_020812                | 100,00                                                    |        |
| DOCK6 | exon29 | chr19  | 11327886 | 11328087 | chr19:11327886-11328087 | 202                  | 11327906 | 11328067 | chr19:11327906-11328067 | 162                  | refseq DOCK6 (isoform1):exon29 exNM_020812                | 100,00                                                    |        |
| DOCK6 | exon28 | chr19  | 11332506 | 11332716 | chr19:11332506-11332716 | 211                  | 11332526 | 11332696 | chr19:11332526-11332696 | 171                  | refseq DOCK6 (isoform1):exon28 exNM_020812                | 100,00                                                    |        |
| DOCK6 | exon27 | chr19  | 11332764 | 11332944 | chr19:11332764-11332944 | 181                  | 11332784 | 11332924 | chr19:11332784-11332924 | 141                  | refseq DOCK6 (isoform1):exon27 exNM_020812                | 100,00                                                    |        |
| DOCK6 | exon26 | chr19  | 11333390 | 11333601 | chr19:11333390-11333601 | 212                  | 11333410 | 11333581 | chr19:11333410-11333581 | 172                  | refseq DOCK6 (isoform1):exon26 exNM_020812                | 100,00                                                    |        |
| DOCK6 | exon25 | chr19  | 11333648 | 11333802 | chr19:11333648-11333802 | 155                  | 11333668 | 11333782 | chr19:11333668-11333782 | 115                  | refseq DOCK6 (isoform1):exon25 exNM_020812                | 100,00                                                    |        |
| DOCK6 | exon24 | chr19  | 11337992 | 11338173 | chr19:11337992-11338173 | 182                  | 11338012 | 11338153 | chr19:11338012-11338153 | 142                  | refseq DOCK6 (isoform1):exon24 exNM_020812                | 100,00                                                    |        |
| DOCK6 | exon23 | chr19  | 11339595 | 11339731 | chr19:11339595-11339731 | 137                  | 11339615 | 11339711 | chr19:11339615-11339711 | 97                   | refseq DOCK6 (isoform1):exon23 exNM_020812                | 100,00                                                    |        |
| DOCK6 | exon22 | chr19  | 11343858 | 11344062 | chr19:11343858-11344062 | 205                  | 11343878 | 11344024 | chr19:11343878-11344024 | 165                  | refseq DOCK6 (isoform1):exon22 exNM_020812                | 100,00                                                    |        |
| DOCK6 | exon21 | chr19  | 11346253 | 11346455 | chr19:11346253-11346455 | 203                  | 11346273 | 11346335 | chr19:11346273-11346335 | 163                  | refseq DOCK6 (isoform1):exon21 exNM_020812                | 100,00                                                    |        |
| DOCK6 | exon20 | chr19  | 11347001 | 11347273 | chr19:11347001-11347273 | 273                  | 11347021 | 11347253 | chr19:11347021-11347253 | 233                  | refseq DOCK6 (isoform1):exon20 exNM_020812                | 100,00                                                    |        |
| DOCK6 | exon19 | chr19  | 11347448 | 11347575 | chr19:11347448-11347575 | 128                  | 11347468 | 11347555 | chr19:11347468-11347555 | 88                   | refseq DOCK6 (isoform1):exon19 exNM_020812                | 100,00                                                    |        |
| DOCK6 | exon18 | chr19  | 11348111 | 11348253 | chr19:11348111-11348253 | 143                  | 11348131 | 11348233 | chr19:11348131-11348233 | 103                  | refseq DOCK6 (isoform1):exon18 exNM_020812                | 100,00                                                    |        |
| DOCK6 | exon17 | chr19  | 11348296 | 11348475 | chr19:11348296-11348475 | 180                  | 11348316 | 11348455 | chr19:11348316-11348455 | 140                  | refseq DOCK6 (isoform1):exon17 exNM_020812                | 100,00                                                    |        |
| DOCK6 | exon16 | chr19  | 11348700 | 11348811 | chr19:11348700-11348811 | 112                  | 11348720 | 11348791 | chr19:11348720-11348791 | 72                   | refseq DOCK6 (isoform1):exon16 exNM_020812                | 100,00                                                    |        |
| DOCK6 | exon15 | chr19  | 11348842 | 11349000 | chr19:11348842-11349000 | 159                  | 11348862 | 11348980 | chr19:11348862-11348980 | 119                  | refseq DOCK6 (isoform1):exon15 exNM_020812                | 100,00                                                    |        |
| DOCK6 | exon14 | chr19  | 11352700 | 11352903 | chr19:11352700-11352903 | 204                  | 11352720 | 11352883 | chr19:11352720-11352883 | 164                  | refseq DOCK6 (isoform1):exon14 exNM_020812                | 100,00                                                    |        |
| DOCK6 | exon13 | chr19  | 11353714 | 11353848 | chr19:11353714-11353848 | 135                  | 11353734 | 11353828 | chr19:11353734-11353828 | 95                   | refseq DOCK6 (isoform1):exon13 exNM_020812                | 100,00                                                    |        |
| DOCK6 | exon12 | chr19  | 11353913 | 11354081 | chr19:11353913-11354081 | 169                  | 11353933 | 11354061 | chr19:11353933-11354061 | 129                  | refseq DOCK6 (isoform1):exon12 exNM_020812                | 100,00                                                    |        |
| DOCK6 | exon11 | chr19  | 11354212 | 11354406 | chr19:11354212-11354406 | 195                  | 11354232 | 11354386 | chr19:11354232-11354386 | 155                  | refseq DOCK6 (isoform1):exon11 exNM_020812                | 100,00                                                    |        |
| DOCK6 | exon10 | chr19  | 11354457 | 11354578 | chr19:11354457-11354578 | 122                  | 11354477 | 11354558 | chr19:11354477-11354558 | 82                   | refseq DOCK6 (isoform1):exon10 exNM_020812                | 100,00                                                    |        |
| DOCK6 | exon9  | chr19  | 11356218 | 11356408 | chr19:11356218-11356408 | 191                  | 11356238 | 11356388 | chr19:11356238-11356388 | 151                  | refseq DOCK6 (isoform1):exon9 exNM_020812                 | 100,00                                                    |        |
| DOCK6 | exon8  | chr19  | 11356467 | 11356574 | chr19:11356467-11356574 | 108                  | 11356487 | 11356554 | chr19:11356487-11356554 | 68                   | refseq DOCK6 (isoform1):exon8 exNM_020812                 | 100,00                                                    |        |
| DOCK6 | exon7  | chr19  | 11358721 | 11358847 | chr19:11358721-11358847 | 127                  | 11358741 | 11358827 | chr19:11358741-11358827 | 87                   | refseq DOCK6 (isoform1):exon7 exNM_020812                 | 100,00                                                    |        |
| DOCK6 | exon6  | chr19  | 11361529 | 11361782 | chr19:11361529-11361782 | 254                  | 11361549 | 11361762 | chr19:11361549-11361762 | 214                  | refseq DOCK6 (isoform1):exon6 exNM_020812                 | 100,00                                                    |        |
| DOCK6 | exon5  | chr19  | 11362774 | 11362944 | chr19:11362774-11362944 | 171                  | 11362794 | 11362924 | chr19:11362794-11362924 | 131                  | refseq DOCK6 (isoform1):exon5 exNM_020812                 | 100,00                                                    |        |
| DOCK6 | exon4  | chr19  | 11363137 | 11363246 | chr19:11363137-11363246 | 110                  | 11363157 | 11363226 | chr19:11363157-11363226 | 70                   | refseq DOCK6 (isoform1):exon4 exNM_020812                 | 100,00                                                    |        |
| DOCK6 | exon3  | chr19  | 11363438 | 11363654 | chr19:11363438-11363654 | 217                  | 11363458 | 11363634 | chr19:11363458-11363634 | 177                  | refseq DOCK6 (isoform1):exon3 exNM_020812                 | 100,00                                                    |        |
| DOCK6 | exon2  | chr19  | 11364294 | 11364422 | chr19:11364294-11364422 | 129                  | 11364314 | 11364402 | chr19:11364314-11364402 | 89                   | refseq DOCK6 (isoform1):exon2 exNM_020812                 | 100,00                                                    |        |
| DSP   | exon1  | exon1  | chr6     | 7542128  | 7542338                 | chr6:7542128-7542338 | 211      | 7542148  | 7542318                 | chr6:7542148-7542318 | 171                                                       | refseq DSP (isoform1 isoform2):exiNM_004415, NM_001008844 | 100,00 |
| DSP   | exon2  | exon2  | chr6     | 7555930  | 7556073                 | chr6:7555930-7556073 | 144      | 7555950  | 7556053                 | chr6:7555950-7556053 | 104                                                       | refseq DSP (isoform1 isoform2):exiNM_004415, NM_001008844 | 100,00 |
| DSP   | exon3  | exon3  | chr6     | 7558328  | 7558517                 | chr6:7558328-7558517 | 190      | 7558348  | 7558497                 | chr6:7558348-7558497 | 150                                                       | refseq DSP (isoform1 isoform2):exiNM_004415, NM_001008844 | 100,00 |
| DSP   | exon4  | exon4  | chr6     | 7559438  | 7559653                 | chr6:7559438-7559653 | 216      | 7559458  | 7559633                 | chr6:7559458-7559633 | 176                                                       | refseq DSP (isoform1 isoform2):exiNM_004415, NM_001008844 | 100,00 |
| DSP   | exon5  | exon5  | chr6     | 7562864  | 7563033                 | chr6:7562864-7563033 | 170      | 7562884  | 7563013                 | chr6:7562884-7563013 | 136                                                       | refseq DSP (isoform1 isoform2):exiNM_004415, NM_001008844 | 100,00 |
| DSP   | exon6  | exon6  | chr6     | 7563948  | 7564039                 | chr6:7563948-7564039 | 92       | 7563968  | 7564019                 | chr6:7563968-7564019 | 52                                                        | refseq DSP (isoform1 isoform2):exiNM_004415, NM_001008844 | 100,00 |
| DSP   | exon7  | exon7  | chr6     | 7565571  | 7565773                 | chr6:7565571-7565773 | 203      | 7565591  | 7565753                 | chr6:7565591-7565753 | 163                                                       | refseq DSP (isoform1 isoform2):exiNM_004415, NM_001008844 | 100,00 |
| DSP   | exon8  | exon8  | chr6     | 7566589  | 7566734                 | chr6:7566589-7566734 | 146      | 7566609  | 7566714                 | chr6:7566609-7566714 | 106                                                       | refseq DSP (isoform1 isoform2):exiNM_004415, NM_001008844 | 100,00 |
| DSP   | exon9  | exon9  | chr6     | 7567566  | 7567702                 | chr6:7567566-7567702 | 137      | 7567586  | 7567682                 | chr6:7567586-7567682 | 97                                                        | refseq DSP (isoform1 isoform2):exiNM_004415, NM_001008844 | 100,00 |
| DSP   | exon10 | exon10 | chr6     | 7567993  | 7568159                 | chr6:7567993-7568159 | 167      | 7568013  | 7568139                 | chr6:7568013-7568139 | 127                                                       | refseq DSP (isoform1 isoform2):exiNM_004415, NM_001008844 | 100,00 |
| DSP   | exon11 | exon11 | chr6     | 7568649  | 7568842                 | chr6:7568649-7568842 | 194      | 7568669  | 7568822                 | chr6:7568669-7568822 | 154                                                       | refseq DSP (isoform1 isoform2):exiNM_004415, NM_001008844 | 100,00 |
| DSP   | exon12 | exon12 | chr6     | 7569398  | 7569593                 | chr6:7569398-7569593 | 196      | 7569418  | 7569573                 | chr6:7569418-7569573 | 156                                                       | refseq DSP (isoform1 isoform2):exiNM_004415, NM_001008844 | 100,00 |
| DSP   | exon13 | exon13 | chr6     | 7570649  | 7570816                 | chr6:7570649-7570816 | 168      | 7570669  | 7570796                 | chr6:7570669-7570796 | 128                                                       | refseq DSP (isoform1 isoform2):exiNM_004415, NM_001008844 | 100,00 |
| DSP   | exon14 | exon14 | chr6     | 7571595  | 7571837                 | chr6:7571595-7571837 | 243      | 7571615  | 7571817                 | chr6:7571615-7571817 | 203                                                       | refseq DSP (isoform1 isoform2):exiNM_004415, NM_001008844 | 100,00 |
| DSP   | exon15 | exon15 | chr6     | 7572054  | 7572321                 | chr6:7572054-7572321 | 268      | 7572074  | 7572301                 | chr6:7572074-7572301 | 228                                                       | refseq DSP (isoform1 isoform2):exiNM_004415, NM_001008844 | 100,00 |
| DSP   | exon16 | exon16 | chr6     | 7574298  | 7574505                 | chr6:7574298-7574505 | 208      | 7574318  | 7574485                 | chr6:7574318-7574485 | 168                                                       | refseq DSP (isoform1 isoform2):exiNM_004415, NM_001008844 | 100,00 |
| DSP   | exon17 | exon17 | chr6     | 7574869  | 7575048                 | chr6:7574869-7575048 | 180      | 7574889  | 7575028                 | chr6:7574889-7575028 | 140                                                       | refseq DSP (isoform1 isoform2):exiNM_004415, NM_001008844 | 100,00 |
| DSP   | exon18 | exon18 | chr6     | 7575507  | 7575741                 | chr6:7575507-7575741 | 235      | 7575527  | 7575721                 | chr6:7575527-7575721 | 195                                                       | refseq DSP (isoform1 isoform2):exiNM_004415, NM_001008844 | 100,00 |
| DSP   | exon19 | exon19 | chr6     | 7576506  | 7576709                 | chr6:7576506-7576709 | 204      | 7576526  | 7576689                 | chr6:7576526-7576689 | 164                                                       | refseq DSP (isoform1 isoform2):exiNM_004415, NM_001008844 | 100,00 |
| DSP   | exon20 | exon20 | chr6     | 7577171  | 7577295                 | chr6:7577171-7577295 | 125      | 7577191  | 7577253                 | chr6:7577191-7577253 | 85                                                        | refseq DSP (isoform1 isoform2):exiNM_004415, NM_001008844 | 100,00 |
| DSP   | exon21 | exon21 | chr6     | 7577991  | 7578139                 | chr6:7577991-7578139 | 149      | 7578011  | 7578119                 | chr6:7578011-7578119 | 109                                                       | refseq DSP (isoform1 isoform2):exiNM_004415, NM_001008844 | 100,00 |
| DSP   | exon22 | exon22 | chr6     | 7578676  | 7578815                 | chr6:7578676-7578815 | 140      | 7578696  | 7578795                 | chr6:7578696-7578795 | 100                                                       | refseq DSP (isoform1 isoform2):exiNM_004415, NM_001008844 | 100,00 |
| DSP   | exon23 | chr6   | 7579487  | 7581822  | chr6:7579487-7581822    | 2336                 | 7579507  | 7581802  | chr6:7579507-7581802    | 2296                 | refseq DSP (isoform1 isoform2):exiNM_004415, NM_001008844 | 100,00                                                    |        |
| DSP   | exon24 | exon24 | chr6     | 7582854  | 7586131                 | chr6:7582854-7586131 | 3278     | 7582874  | 7586111                 | chr6:7582874-7586111 | 3238                                                      | refseq DSP (isoform1 isoform2):exiNM_004415, NM_001008844 | 100,00 |
| DTNB  | exon17 | exon17 | chr2     | 25602167 | 25602212</              |                      |          |          |                         |                      |                                                           |                                                           |        |

|       |        |       |          |          |                         |      |          |          |                         |      |                                                          |        |
|-------|--------|-------|----------|----------|-------------------------|------|----------|----------|-------------------------|------|----------------------------------------------------------|--------|
| EP300 | exon26 | chr22 | 41565486 | 41565640 | chr22:41565486-41565640 | 155  | 41565506 | 41565620 | chr22:41565506-41565620 | 115  | refseq EP300 isoforme1 :exon26 extNM_001429              | 100,00 |
| EP300 | exon27 | chr22 | 41566389 | 41566595 | chr22:41566389-41566595 | 207  | 41566409 | 41566575 | chr22:41566409-41566575 | 167  | refseq EP300 isoforme1 :exon27 extNM_001429              | 100,00 |
| EP300 | exon28 | chr22 | 41568482 | 41568687 | chr22:41568482-41568687 | 206  | 41568502 | 41568667 | chr22:41568502-41568667 | 166  | refseq EP300 isoforme1 :exon28 extNM_001429              | 100,00 |
| EP300 | exon29 | chr22 | 41569606 | 41569808 | chr22:41569606-41569808 | 203  | 41569626 | 41569788 | chr22:41569626-41569788 | 163  | refseq EP300 isoforme1 :exon29 extNM_001429              | 100,00 |
| EP300 | exon30 | chr22 | 41572230 | 41572552 | chr22:41572230-41572552 | 323  | 41572250 | 41572532 | chr22:41572250-41572532 | 283  | refseq EP300 isoforme1 :exon30 extNM_001429              | 100,00 |
| EP300 | exon31 | chr22 | 41572756 | 41574980 | chr22:41572756-41574980 | 2225 | 41572776 | 41574960 | chr22:41572776-41574960 | 2185 | refseq EP300 isoforme1 :exon31 extNM_001429              | 100,00 |
| EPHA8 | exon1  | chr1  | 22890108 | 22890242 | chr1:22890108-22890242  | 135  | 22890128 | 22890222 | chr1:22890128-22890222  | 95   | refseq EPHA8 isoforme1 isoforme2 :NM_020526,NM_001006943 | 0,00   |
| EPHA8 | exon2  | chr1  | 22895761 | 22895866 | chr1:22895761-22895866  | 106  | 22895781 | 22895846 | chr1:22895781-22895846  | 66   | refseq EPHA8 isoforme1 isoforme2 :NM_020526,NM_001006943 | 100,00 |
| EPHA8 | exon3  | chr1  | 22902689 | 22903393 | chr1:22902689-22903393  | 705  | 22902709 | 22903373 | chr1:22902709-22903373  | 665  | refseq EPHA8 isoforme1 isoforme2 :NM_020526,NM_001006943 | 100,00 |
| EPHA8 | exon4  | chr1  | 22912952 | 22913148 | chr1:22912952-22913148  | 197  | 22912972 | 22913128 | chr1:22912972-22913128  | 157  | refseq EPHA8 isoforme1 isoforme2 :NM_020526,NM_001006943 | 100,00 |
| EPHA8 | exon5  | chr1  | 22915343 | 22915892 | chr1:22915343-22915892  | 550  | 22915363 | 22915872 | chr1:22915363-22915872  | 510  | refseq EPHA8 isoforme2 :exon5 extNM_001006943            | 100,00 |
| EPHA8 | exon6  | chr1  | 22919798 | 22919963 | chr1:22919798-22919963  | 166  | 22919818 | 22919943 | chr1:22919818-22919943  | 126  | refseq EPHA8 isoforme1 :exon6 extNM_020526               | 100,00 |
| EPHA8 | exon7  | chr1  | 22919996 | 22920199 | chr1:22919996-22920199  | 204  | 22920016 | 22920179 | chr1:22920016-22920179  | 164  | refseq EPHA8 isoforme1 :exon7 extNM_020526               | 100,00 |
| EPHA8 | exon8  | chr1  | 22921702 | 22921836 | chr1:22921702-22921836  | 135  | 22921722 | 22921816 | chr1:22921722-22921816  | 95   | refseq EPHA8 isoforme1 :exon8 extNM_020526               | 100,00 |
| EPHA8 | exon9  | chr1  | 22922578 | 22922686 | chr1:22922578-22922686  | 109  | 22922598 | 22922666 | chr1:22922598-22922666  | 69   | refseq EPHA8 isoforme1 :exon9 extNM_020526               | 100,00 |
| EPHA8 | exon10 | chr1  | 22923784 | 22923989 | chr1:22923784-22923989  | 206  | 22923804 | 22923969 | chr1:22923804-22923969  | 166  | refseq EPHA8 isoforme1 :exon10 extNM_020526              | 100,00 |
| EPHA8 | exon11 | chr1  | 22924148 | 22924374 | chr1:22924148-22924374  | 227  | 22924168 | 22924354 | chr1:22924168-22924354  | 187  | refseq EPHA8 isoforme1 :exon11 extNM_020526              | 100,00 |
| EPHA8 | exon12 | chr1  | 22924623 | 22924725 | chr1:22924623-22924725  | 103  | 22924643 | 22924705 | chr1:22924643-22924705  | 63   | refseq EPHA8 isoforme1 :exon12 extNM_020526              | 100,00 |
| EPHA8 | exon13 | chr1  | 22925310 | 22925560 | chr1:22925310-22925560  | 255  | 22925330 | 22925540 | chr1:22925330-22925540  | 211  | refseq EPHA8 isoforme1 :exon13 extNM_020526              | 100,00 |
| EPHA8 | exon14 | chr1  | 22927133 | 22927323 | chr1:22927133-22927323  | 191  | 22927153 | 22927303 | chr1:22927153-22927303  | 151  | refseq EPHA8 isoforme1 :exon14 extNM_020526              | 100,00 |
| EPHA8 | exon15 | chr1  | 22927370 | 22927601 | chr1:22927370-22927601  | 232  | 22927390 | 22927581 | chr1:22927390-22927581  | 192  | refseq EPHA8 isoforme1 :exon15 extNM_020526              | 100,00 |
| EPHA8 | exon16 | chr1  | 22927772 | 22927986 | chr1:22927772-22927986  | 215  | 22927792 | 22927966 | chr1:22927792-22927966  | 175  | refseq EPHA8 isoforme1 :exon16 extNM_020526              | 100,00 |
| EPHA8 | exon17 | chr1  | 22928099 | 22928254 | chr1:22928099-22928254  | 156  | 22928119 | 22928234 | chr1:22928119-22928234  | 116  | refseq EPHA8 isoforme1 :exon17 extNM_020526              | 100,00 |
| FOXL2 | exon1  | chr3  | 13866443 | 13866584 | chr3:13866443-13866584  | 1172 | 13866433 | 13866554 | chr3:13866433-13866554  | 1132 | refseq FOXL2 isoforme1 :exon1 extNM_023067               | 100,00 |
| GNA13 | exon3  | chr17 | 63010354 | 63010967 | chr17:63010354-63010967 | 614  | 63010374 | 63010947 | chr17:63010374-63010947 | 574  | refseq GNA13 isoforme1 isoforme2 :NM_001282425,NM_006572 | 100,00 |
| GNA13 | exon2  | chr17 | 63014350 | 63014441 | chr17:63014350-63014441 | 92   | 63014370 | 63014421 | chr17:63014370-63014421 | 52   | refseq GNA13 isoforme1 isoforme2 :NM_001282425,NM_006572 | 100,00 |
| GNA13 | exon2  | chr17 | 63049599 | 63049866 | chr17:63049599-63049866 | 268  | 63049619 | 63049846 | chr17:63049619-63049846 | 228  | refseq GNA13 isoforme2 :exon2 extNM_006572               | 100,00 |
| GNA13 | exon1  | chr17 | 63052408 | 63052731 | chr17:63052408-63052731 | 324  | 63052428 | 63052711 | chr17:63052428-63052711 | 284  | refseq GNA13 isoforme2 :exon1 extNM_006572               | 100,00 |
| GPC6  | exon1  | chr13 | 93879689 | 93879889 | chr13:93879689-93879889 | 201  | 93879709 | 93879869 | chr13:93879709-93879869 | 161  | refseq GPC6 isoforme1 :exon1 extNM_005708                | 100,00 |
| GPC6  | exon2  | chr13 | 94197495 | 94197694 | chr13:94197495-94197694 | 200  | 94197515 | 94197674 | chr13:94197515-94197674 | 160  | refseq GPC6 isoforme1 :exon2 extNM_005708                | 100,00 |
| GPC6  | exon3  | chr13 | 94482386 | 94482818 | chr13:94482386-94482818 | 433  | 94482406 | 94482798 | chr13:94482406-94482798 | 393  | refseq GPC6 isoforme1 :exon3 extNM_005708                | 100,00 |
| GPC6  | exon4  | chr13 | 94679962 | 94680168 | chr13:94679962-94680168 | 207  | 94679982 | 94680148 | chr13:94679982-94680148 | 167  | refseq GPC6 isoforme1 :exon4 extNM_005708                | 100,00 |
| GPC6  | exon5  | chr13 | 94938582 | 94938753 | chr13:94938582-94938753 | 172  | 94938602 | 94938733 | chr13:94938602-94938733 | 132  | refseq GPC6 isoforme1 :exon5 extNM_005708                | 100,00 |
| GPC6  | exon6  | chr13 | 94958213 | 94958397 | chr13:94958213-94958397 | 185  | 94958233 | 94958377 | chr13:94958233-94958377 | 145  | refseq GPC6 isoforme1 :exon6 extNM_005708                | 100,00 |
| GPC6  | exon7  | chr13 | 95034647 | 95034824 | chr13:95034647-95034824 | 178  | 95034667 | 95034804 | chr13:95034667-95034804 | 138  | refseq GPC6 isoforme1 :exon7 extNM_005708                | 100,00 |
| GPC6  | exon8  | chr13 | 95050699 | 95050915 | chr13:95050699-95050915 | 217  | 95050719 | 95050895 | chr13:95050719-95050895 | 177  | refseq GPC6 isoforme1 :exon8 extNM_005708                | 100,00 |
| GPC6  | exon9  | chr13 | 95055248 | 95055491 | chr13:95055248-95055491 | 244  | 95055268 | 95055471 | chr13:95055268-95055471 | 204  | refseq GPC6 isoforme1 :exon9 extNM_005708                | 100,00 |
| GPR75 | exon1  | chr2  | 54080250 | 54081913 | chr2:54080250-54081913  | 1664 | 54080270 | 54081893 | chr2:54080270-54081893  | 1624 | refseq GPR75 isoforme1 :exon1 extNM_006794               | 100,00 |
| GPR98 | exon1  | chr5  | 89854692 | 89854754 | chr5:89854692-89854754  | 63   | 89854712 | 89854734 | chr5:89854712-89854734  | 23   | refseq GPR98 isoforme1 :exon1 extNM_032119               | 100,00 |
| GPR98 | exon2  | chr5  | 89910631 | 89910856 | chr5:89910631-89910856  | 226  | 89910651 | 89910836 | chr5:89910651-89910836  | 186  | refseq GPR98 isoforme1 :exon2 extNM_032119               | 100,00 |
| GPR98 | exon3  | chr5  | 89913600 | 89913790 | chr5:89913600-89913790  | 191  | 89913620 | 89913770 | chr5:89913620-89913770  | 151  | refseq GPR98 isoforme1 :exon3 extNM_032119               | 100,00 |
| GPR98 | exon4  | chr5  | 89914882 | 89915018 | chr5:89914882-89915018  | 137  | 89914902 | 89914998 | chr5:89914902-89914998  | 97   | refseq GPR98 isoforme1 :exon4 extNM_032119               | 100,00 |
| GPR98 | exon5  | chr5  | 89918393 | 89918538 | chr5:89918393-89918538  | 146  | 89918413 | 89918518 | chr5:89918413-89918518  | 106  | refseq GPR98 isoforme1 :exon5 extNM_032119               | 100,00 |
| GPR98 | exon6  | chr5  | 89920926 | 89921080 | chr5:89920926-89921080  | 155  | 89920946 | 89921060 | chr5:89920946-89921060  | 115  | refseq GPR98 isoforme1 :exon6 extNM_032119               | 100,00 |
| GPR98 | exon7  | chr5  | 89923007 | 89923613 | chr5:89923007-89923613  | 607  | 89923027 | 89923593 | chr5:89923027-89923593  | 567  | refseq GPR98 isoforme1 :exon7 extNM_032119               | 100,00 |
| GPR98 | exon8  | chr5  | 89924358 | 89924669 | chr5:89924358-89924669  | 312  | 89924378 | 89924649 | chr5:89924378-89924649  | 272  | refseq GPR98 isoforme1 :exon8 extNM_032119               | 100,00 |
| GPR98 | exon9  | chr5  | 89925006 | 89925376 | chr5:89925006-89925376  | 371  | 89925026 | 89925356 | chr5:89925026-89925356  | 331  | refseq GPR98 isoforme1 :exon9 extNM_032119               | 100,00 |
| GPR98 | exon10 | chr5  | 89930910 | 89931127 | chr5:89930910-89931127  | 218  | 89930930 | 89931107 | chr5:89930930-89931107  | 178  | refseq GPR98 isoforme1 :exon10 extNM_032119              | 100,00 |
| GPR98 | exon11 | chr5  | 89933521 | 89933785 | chr5:89933521-89933785  | 265  | 89933541 | 89933765 | chr5:89933541-89933765  | 225  | refseq GPR98 isoforme1 :exon11 extNM_032119              | 100,00 |
| GPR98 | exon12 | chr5  | 89938432 | 89938599 | chr5:89938432-89938599  | 168  | 89938452 | 89938579 | chr5:89938452-89938579  | 128  | refseq GPR98 isoforme1 :exon12 extNM_032119              | 100,00 |
| GPR98 | exon13 | chr5  | 89938652 | 89938878 | chr5:89938652-89938878  | 227  | 89938672 | 89938858 | chr5:89938672-89938858  | 187  | refseq GPR98 isoforme1 :exon13 extNM_032119              | 100,00 |
| GPR98 | exon14 | chr5  | 89939599 | 89939820 | chr5:89939599-89939820  | 222  | 89939619 | 89939800 | chr5:89939619-89939800  | 182  | refseq GPR98 isoforme1 :exon14 extNM_032119              | 100,00 |
| GPR98 | exon15 | chr5  | 89940502 | 89940706 | chr5:89940502-89940706  | 205  | 89940522 | 89940686 | chr5:89940522-89940686  | 165  | refseq GPR98 isoforme1 :exon15 extNM_032119              | 100,00 |
| GPR98 | exon16 | chr5  | 89941764 | 89941928 | chr5:89941764-89941928  | 165  | 89941784 | 89941908 | chr5:89941784-89941908  | 125  | refseq GPR98 isoforme1 :exon16 extNM_032119              | 100,00 |
| GPR98 | exon17 | chr5  | 89943294 | 89943601 | chr5:89943294-89943601  | 308  | 89943314 | 89943581 | chr5:89943314-89943581  | 268  | refseq GPR98 isoforme1 :exon17 extNM_032119              | 100,00 |
| GPR98 | exon18 | chr5  | 89947400 | 89947567 | chr5:89947400-89947567  | 168  | 89947420 | 89947547 | chr5:89947420-89947547  | 128  | refseq GPR98 isoforme1 :exon18 extNM_032119              | 100,00 |
| GPR98 | exon19 | chr5  | 89948142 | 89948400 | chr5:89948142-89948400  | 259  | 89948162 | 89948380 | chr5:89948162-89948380  | 219  | refseq GPR98 isoforme1 :exon19 extNM_032119              | 100,00 |
| GPR98 | exon20 | chr5  | 89949005 | 89949789 | chr5:89949005-89949789  | 785  | 89949025 | 89949769 | chr5:89949025-89949769  | 745  | refseq GPR98 isoforme1 :exon20 extNM_032119              | 100,00 |
| GPR98 | exon21 | chr5  | 89953701 | 89954115 | chr5:89953701-89954115  | 415  | 89953721 | 89954095 | chr5:89953721-89954095  | 375  | refseq GPR98 isoforme1 :exon21 extNM_032119              | 100,00 |
| GPR98 | exon22 | chr5  | 89968342 | 89968559 | chr5:89968342-89968559  | 218  | 89968362 | 89968539 | chr5:89968362-89968539  | 178  | refseq GPR98 isoforme1 :exon22 extNM_032119              | 100,00 |
| GPR98 | exon23 | chr5  | 89969850 | 89970071 | chr5:89969850-89970071  | 222  | 89969870 | 89970051 | chr5:89969870-89970051  | 182  | refseq GPR98 isoforme1 :exon23 extNM_032119              | 100,00 |
| GPR98 | exon24 | chr5  | 89971039 | 89971282 | chr5:89971039-89971282  | 244  | 89971059 | 89971262 | chr5:89971059-89971262  | 204  | refseq GPR98 isoforme1 :exon24 extNM_032119              | 100,00 |
| GPR98 | exon25 | chr5  | 89971876 | 89972046 | chr5:89971876-89972046  | 171  | 89971896 | 89972026 | chr5:89971896-89972026  | 131  | refseq GPR98 isoforme1 :exon25 extNM_032119              | 100,00 |
| GPR98 | exon26 | chr5  | 89975345 | 89975466 | chr5:89975345-89975466  | 122  | 89975365 | 89975446 | chr5:89975365-89975446  | 82   | refseq GPR98 isoforme1 :exon26 extNM_032119              | 100,00 |
| GPR98 | exon27 | chr5  | 89977111 | 89977291 | chr5:89977111-89977291  | 181  | 89977131 | 89977271 | chr5:89977131-89977271  | 141  | refseq GPR98 isoforme1 :exon27 extNM_03211               |        |

|           |        |        |           |           |                           |                          |           |           |                           |                          |                                     |                                                                         |        |
|-----------|--------|--------|-----------|-----------|---------------------------|--------------------------|-----------|-----------|---------------------------|--------------------------|-------------------------------------|-------------------------------------------------------------------------|--------|
| GRID2     | exon3  | chr4   | 94006125  | 94006450  | chr4:94006125-94006450    | 326                      | 94006145  | 94006430  | chr4:94006145-94006430    | 286                      | refseq GRID2  isoforme2):exon3 exte | NM_001510                                                               | 100,00 |
| GRID2     | exon3  | exon4  | chr4      | 94032124  | chr4:94031878-94032124    | 247                      | 94031898  | 94032104  | chr4:94032104-94032104    | 207                      | refseq GRID2  isoforme2):exon3 exte | NM_001286838, NM_001510                                                 | 100,00 |
| GRID2     | exon4  | exon5  | chr4      | 94128534  | 94128628                  | chr4:94128534-94128628   | 95        | 94128554  | 94128608                  | chr4:94128554-94128608   | 55                                  | refseq GRID2  isoforme1 isoforme2):NM_001286838, NM_001510              | 100,00 |
| GRID2     | exon5  | exon6  | chr4      | 94137868  | 94138082                  | chr4:94137868-94138082   | 215       | 94137888  | 94138062                  | chr4:94137888-94138062   | 175                                 | refseq GRID2  isoforme1 isoforme2):NM_001286838, NM_001510              | 100,00 |
| GRID2     | exon6  | exon7  | chr4      | 94145744  | 94145946                  | chr4:94145744-94145946   | 203       | 94145764  | 94145926                  | chr4:94145764-94145926   | 163                                 | refseq GRID2  isoforme1 isoforme2):NM_001286838, NM_001510              | 100,00 |
| GRID2     | exon7  | exon8  | chr4      | 94159501  | 94159661                  | chr4:94159501-94159661   | 161       | 94159521  | 94159641                  | chr4:94159521-94159641   | 121                                 | refseq GRID2  isoforme1 isoforme2):NM_001286838, NM_001510              | 100,00 |
| GRID2     | exon8  | exon9  | chr4      | 94316737  | 94316879                  | chr4:94316737-94316879   | 143       | 94316757  | 94316859                  | chr4:94316757-94316859   | 103                                 | refseq GRID2  isoforme1 isoforme2):NM_001286838, NM_001510              | 100,00 |
| GRID2     | exon9  | exon10 | chr4      | 94343901  | 94344139                  | chr4:94343901-94344139   | 239       | 94343921  | 94344119                  | chr4:94343921-94344119   | 199                                 | refseq GRID2  isoforme1 isoforme2):NM_001286838, NM_001510              | 100,00 |
| GRID2     | exon10 | exon11 | chr4      | 94376792  | 94377145                  | chr4:94376792-94377145   | 354       | 94376812  | 94377125                  | chr4:94376812-94377125   | 314                                 | refseq GRID2  isoforme1 isoforme2):NM_001286838, NM_001510              | 100,00 |
| GRID2     | exon11 | exon12 | chr4      | 94411769  | 94411948                  | chr4:94411769-94411948   | 180       | 94411789  | 94411928                  | chr4:94411789-94411928   | 140                                 | refseq GRID2  isoforme1 isoforme2):NM_001286838, NM_001510              | 100,00 |
| GRID2     | exon12 | exon13 | chr4      | 94436346  | 94436582                  | chr4:94436346-94436582   | 237       | 94436366  | 94436562                  | chr4:94436366-94436562   | 197                                 | refseq GRID2  isoforme1 isoforme2):NM_001286838, NM_001510              | 100,00 |
| GRID2     | exon13 | exon14 | chr4      | 94547399  | 94547606                  | chr4:94547399-94547606   | 208       | 94547419  | 94547586                  | chr4:94547419-94547586   | 168                                 | refseq GRID2  isoforme1 isoforme2):NM_001286838, NM_001510              | 100,00 |
| GRID2     | exon14 | exon15 | chr4      | 94690340  | 94690621                  | chr4:94690340-94690621   | 282       | 94690360  | 94690601                  | chr4:94690360-94690601   | 242                                 | refseq GRID2  isoforme1 isoforme2):NM_001286838, NM_001510              | 100,00 |
| GRID2     | exon15 | exon16 | chr4      | 94693206  | 94693669                  | chr4:94693206-94693669   | 464       | 94693226  | 94693649                  | chr4:94693226-94693649   | 424                                 | refseq GRID2  isoforme1 isoforme2):NM_001286838, NM_001510              | 100,00 |
| GRK5      | exon1  | chr10  | 120967409 | 120967501 | chr10:120967409-120967501 | 93                       | 120967429 | 120967481 | chr10:120967429-120967481 | 53                       | refseq GRK5  isoforme1):exon1 exte  | NM_005308                                                               | 100,00 |
| GRK5      | exon2  | chr10  | 121086007 | 121086143 | chr10:121086007-121086143 | 137                      | 121086027 | 121086123 | chr10:121086027-121086123 | 97                       | refseq GRK5  isoforme1):exon2 exte  | NM_005308                                                               | 100,00 |
| GRK5      | exon3  | chr10  | 121140306 | 121140459 | chr10:121140306-121140459 | 154                      | 121140326 | 121140439 | chr10:121140326-121140439 | 114                      | refseq GRK5  isoforme1):exon3 exte  | NM_005308                                                               | 100,00 |
| GRK5      | exon4  | chr10  | 121156186 | 121156304 | chr10:121156186-121156304 | 119                      | 121156206 | 121156286 | chr10:121156206-121156286 | 79                       | refseq GRK5  isoforme1):exon4 exte  | NM_005308                                                               | 100,00 |
| GRK5      | exon5  | chr10  | 121182657 | 121182798 | chr10:121182657-121182798 | 142                      | 121182677 | 121182778 | chr10:121182677-121182778 | 102                      | refseq GRK5  isoforme1):exon5 exte  | NM_005308                                                               | 100,00 |
| GRK5      | exon6  | chr10  | 121184484 | 121184617 | chr10:121184484-121184617 | 134                      | 121184504 | 121184597 | chr10:121184504-121184597 | 94                       | refseq GRK5  isoforme1):exon6 exte  | NM_005308                                                               | 100,00 |
| GRK5      | exon7  | chr10  | 121189866 | 121189970 | chr10:121189866-121189970 | 105                      | 121189886 | 121189950 | chr10:121189886-121189950 | 65                       | refseq GRK5  isoforme1):exon7 exte  | NM_005308                                                               | 100,00 |
| GRK5      | exon8  | chr10  | 121190878 | 121191059 | chr10:121190878-121191059 | 182                      | 121190898 | 121191039 | chr10:121190898-121191039 | 142                      | refseq GRK5  isoforme1):exon8 exte  | NM_005308                                                               | 100,00 |
| GRK5      | exon9  | chr10  | 121196142 | 121196373 | chr10:121196142-121196373 | 232                      | 121196162 | 121196353 | chr10:121196162-121196353 | 192                      | refseq GRK5  isoforme1):exon9 exte  | NM_005308                                                               | 100,00 |
| GRK5      | exon10 | chr10  | 121199222 | 121199300 | chr10:121199222-121199300 | 79                       | 121199242 | 121199280 | chr10:121199242-121199280 | 39                       | refseq GRK5  isoforme1):exon10 exte | NM_005308                                                               | 100,00 |
| GRK5      | exon11 | chr10  | 121201490 | 121201620 | chr10:121201490-121201620 | 131                      | 121201510 | 121201600 | chr10:121201510-121201600 | 91                       | refseq GRK5  isoforme1):exon11 exte | NM_005308                                                               | 100,00 |
| GRK5      | exon12 | chr10  | 121203035 | 121203284 | chr10:121203035-121203284 | 250                      | 121203055 | 121203264 | chr10:121203055-121203264 | 210                      | refseq GRK5  isoforme1):exon12 exte | NM_005308                                                               | 100,00 |
| GRK5      | exon13 | chr10  | 121207614 | 121207792 | chr10:121207614-121207792 | 179                      | 121207634 | 121207772 | chr10:121207634-121207772 | 139                      | refseq GRK5  isoforme1):exon13 exte | NM_005308                                                               | 100,00 |
| GRK5      | exon14 | chr10  | 121212162 | 121212340 | chr10:121212162-121212340 | 179                      | 121212182 | 121212320 | chr10:121212182-121212320 | 139                      | refseq GRK5  isoforme1):exon14 exte | NM_005308                                                               | 100,00 |
| GRK5      | exon15 | chr10  | 121212636 | 121212808 | chr10:121212636-121212808 | 173                      | 121212656 | 121212788 | chr10:121212656-121212788 | 133                      | refseq GRK5  isoforme1):exon15 exte | NM_005308                                                               | 100,00 |
| GRK5      | exon16 | chr10  | 121214460 | 121214599 | chr10:121214460-121214599 | 140                      | 121214480 | 121214579 | chr10:121214480-121214579 | 100                      | refseq GRK5  isoforme1):exon16 exte | NM_005308                                                               | 100,00 |
| HIST1H1D  | exon1  | chr6   | 26234475  | 26235181  | chr6:26234475-26235181    | 707                      | 26234495  | 26235161  | chr6:26234495-26235161    | 667                      | refseq HIST1H1D  isoforme1):exon1   | NM_005320                                                               | 100,00 |
| HIST1H2AD | exon1  | chr6   | 26199058  | 26199491  | chr6:26199058-26199491    | 434                      | 26199078  | 26199471  | chr6:26199078-26199471    | 394                      | refseq HIST1H2AD  isoforme1):exon1  | NM_021065                                                               | 100,00 |
| HIST1H2AG | exon1  | chr6   | 27100830  | 27101263  | chr6:27100830-27101263    | 434                      | 27100850  | 27101243  | chr6:27100850-27101243    | 394                      | refseq HIST1H2AG  isoforme1):exon1  | NM_021066                                                               | 100,00 |
| HIST1H2BK | exon1  | chr6   | 27114176  | 27114597  | chr6:27114176-27114597    | 422                      | 27114196  | 27114577  | chr6:27114196-27114577    | 382                      | refseq HIST1H2BK  isoforme1):exon1  | NM_080593                                                               | 100,00 |
| HIST4H4   | exon1  | chr12  | 14923686  | 14924038  | chr12:14923686-14924038   | 353                      | 14923706  | 14924018  | chr12:14923706-14924018   | 313                      | refseq HIST4H4  isoforme1):exon1 e  | NM_175054                                                               | 100,00 |
| HRAS      | exon4  | exon4  | chr11     | 532615    | 532775                    | chr11:532615-532775      | 161       | 532635    | 532755                    | chr11:532635-532755      | 121                                 | refseq HRAS  isoforme1 isoforme3):NM_005343, NM_176795, NM_001131       | 100,00 |
| HRAS      | exon4  | chr11  | 533275    | 533378    | chr11:533275-533378       | 104                      | 533295    | 533358    | chr11:533295-533358       | 64                       | refseq HRAS  isoforme2):exon4 exte  | NM_176795                                                               | 100,00 |
| HRAS      | exon3  | exon3  | chr11     | 533432    | 533632                    | chr11:533432-533632      | 201       | 533452    | 533612                    | chr11:533452-533612      | 161                                 | refseq HRAS  isoforme1 isoforme2 is:NM_005343, NM_176795, NM_001131     | 100,00 |
| HRAS      | exon2  | exon2  | chr11     | 533745    | 533964                    | chr11:533745-533964      | 220       | 533765    | 533944                    | chr11:533765-533944      | 180                                 | refseq HRAS  isoforme1 isoforme2 is:NM_005343, NM_176795, NM_001131     | 100,00 |
| HRAS      | exon1  | exon1  | chr11     | 534191    | 534342                    | chr11:534191-534342      | 152       | 534211    | 534322                    | chr11:534211-534322      | 112                                 | refseq HRAS  isoforme1 isoforme2 is:NM_005343, NM_176795, NM_001131     | 100,00 |
| HSPD1     | exon11 | exon11 | chr2      | 198351942 | 198351942                 | chr2:198351942-198351942 | 194       | 198351769 | 198351922                 | chr2:198351769-198351922 | 154                                 | refseq HSPD1  isoforme1 isoforme2):NM_199440, NM_002156                 | 100,00 |
| HSPD1     | exon10 | exon10 | chr2      | 198352561 | 198352780                 | chr2:198352561-198352780 | 220       | 198352581 | 198352760                 | chr2:198352581-198352760 | 180                                 | refseq HSPD1  isoforme1 isoforme2):NM_199440, NM_002156                 | 100,00 |
| HSPD1     | exon9  | exon9  | chr2      | 198353020 | 198353235                 | chr2:198353020-198353235 | 216       | 198353040 | 198353215                 | chr2:198353040-198353215 | 176                                 | refseq HSPD1  isoforme1 isoforme2):NM_199440, NM_002156                 | 100,00 |
| HSPD1     | exon8  | exon8  | chr2      | 198353705 | 198353991                 | chr2:198353705-198353991 | 287       | 198353725 | 198353971                 | chr2:198353725-198353971 | 247                                 | refseq HSPD1  isoforme1 isoforme2):NM_199440, NM_002156                 | 100,00 |
| HSPD1     | exon7  | exon7  | chr2      | 198354900 | 198355040                 | chr2:198354900-198355040 | 141       | 198354920 | 198355071                 | chr2:198354920-198355071 | 101                                 | refseq HSPD1  isoforme1 isoforme2):NM_199440, NM_002156                 | 100,00 |
| HSPD1     | exon6  | exon6  | chr2      | 198358027 | 198358236                 | chr2:198358027-198358236 | 210       | 198358047 | 198358216                 | chr2:198358047-198358216 | 170                                 | refseq HSPD1  isoforme1 isoforme2):NM_199440, NM_002156                 | 100,00 |
| HSPD1     | exon5  | exon5  | chr2      | 198358860 | 198358994                 | chr2:198358860-198358994 | 135       | 198358880 | 198358974                 | chr2:198358880-198358974 | 95                                  | refseq HSPD1  isoforme1 isoforme2):NM_199440, NM_002156                 | 100,00 |
| HSPD1     | exon4  | exon4  | chr2      | 198359360 | 198359496                 | chr2:198359360-198359496 | 137       | 198359380 | 198359476                 | chr2:198359380-198359476 | 97                                  | refseq HSPD1  isoforme1 isoforme2):NM_199440, NM_002156                 | 100,00 |
| HSPD1     | exon3  | exon3  | chr2      | 198359997 | 198360120                 | chr2:198359997-198360120 | 124       | 198360017 | 198360100                 | chr2:198360017-198360100 | 84                                  | refseq HSPD1  isoforme1 isoforme2):NM_199440, NM_002156                 | 100,00 |
| HSPD1     | exon2  | exon2  | chr2      | 198361843 | 198362136                 | chr2:198361843-198362136 | 294       | 198361863 | 198362116                 | chr2:198361863-198362116 | 254                                 | refseq HSPD1  isoforme1 isoforme2):NM_199440, NM_002156                 | 100,00 |
| HSPD1     | exon1  | exon1  | chr2      | 198363378 | 198363592                 | chr2:198363378-198363592 | 215       | 198363398 | 198363572                 | chr2:198363398-198363572 | 175                                 | refseq HSPD1  isoforme1 isoforme2):NM_199440, NM_002156                 | 100,00 |
| IFIT5     | exon1  | chr10  | 91174535  | 91174580  | chr10:91174535-91174580   | 46                       | 91174555  | 91174560  | chr10:91174555-91174560   | 6                        | refseq IFIT5  isoforme1):exon1 exte | NM_012420                                                               | 100,00 |
| IFIT5     | exon2  | chr10  | 91176941  | 91178425  | chr10:91176941-91178425   | 1485                     | 91176961  | 91178405  | chr10:91176961-91178405   | 1445                     | refseq IFIT5  isoforme1):exon2 exte | NM_012420                                                               | 100,00 |
| IGF2BP2   | exon16 | exon16 | chr3      | 185363298 | 185363431                 | chr3:185363298-185363431 | 134       | 185363318 | 185363411                 | chr3:185363318-185363411 | 94                                  | refseq IGF2BP2  isoforme1 isoforme2):NM_006548, NM_001291873, NM_001510 | 100,00 |
| IGF2BP2   | exon15 | exon15 | chr3      | 185364792 | 185364946                 | chr3:185364792-185364946 | 155       | 185364812 | 185364926                 | chr3:185364812-185364926 | 115                                 | refseq IGF2BP2  isoforme1 isoforme2):NM_006548, NM_001291873, NM_001510 | 100,00 |
| IGF2BP2   | exon14 | exon14 | chr3      | 185367170 | 185367342                 | chr3:185367170-185367342 | 173       | 185367190 | 185367322                 | chr3:185367190-185367322 | 133                                 | refseq IGF2BP2  isoforme1 isoforme2):NM_006548, NM_001291873, NM_001510 | 100,00 |
| IGF2BP2   | exon13 | exon13 | chr3      | 185369861 | 185369976                 | chr3:185369861-185369976 | 116       | 185369881 | 185369956                 | chr3:185369881-185369956 | 76                                  | refseq IGF2BP2  isoforme1 isoforme2):NM_006548, NM_001291873, NM_001510 | 100,00 |
| IGF2BP2   | exon12 | exon12 | chr3      | 185375210 | 185375053                 | chr3:185375210-185375053 | 158       | 185375073 | 185375190                 | chr3:185375073-185375190 | 118                                 | refseq IGF2BP2  isoforme1 isoforme2):NM_006548, NM_001291873, NM_001510 | 100,00 |
| IGF2BP2   | exon11 | exon11 | chr3      | 185376108 | 185376217                 | chr3:185376108-185376217 | 110       | 185376128 | 185376197                 | chr3:185376128-185376197 | 70                                  | refseq IGF2BP2  isoforme1 isoforme2):NM_006548, NM_001291873, NM_001510 | 100,00 |
| IGF2BP2   | exon10 | exon10 | chr3      | 185390308 | 185390477                 | chr3:185390308-185390477 | 170       | 185390328 | 185390457                 | chr3:185390328-185390457 | 130                                 | refseq IGF2BP2  isoforme1 isoforme2):NM_006548, NM_001291873, NM_001510 | 100,00 |
| IGF2BP2   | exon9  | exon9  | chr3      | 185393063 |                           |                          |           |           |                           |                          |                                     |                                                                         |        |

|          |        |       |           |           |                           |     |           |           |                           |     |                                              |        |
|----------|--------|-------|-----------|-----------|---------------------------|-----|-----------|-----------|---------------------------|-----|----------------------------------------------|--------|
| KIAA0368 | exon3  | chr9  | 114246244 | 114246561 | chr9:114246244-114246561  | 318 | 114246264 | 114246541 | chr9:114246264-114246541  | 278 | refseq KIAA0368 isoform1 exon3 NM_001080398  | 11,15  |
| KIAA0368 | exon51 | chr9  | 114124289 | 114124469 | chr9:114124289-114124469  | 181 | 114124309 | 114124449 | chr9:114124309-114124449  | 141 | refseq KIAA0368 isoform1 exon51 NM_001080398 | 100,00 |
| KIAA0368 | exon50 | chr9  | 114125847 | 114125959 | chr9:114125847-114125959  | 113 | 114125867 | 114125939 | chr9:114125867-114125939  | 73  | refseq KIAA0368 isoform1 exon50 NM_001080398 | 100,00 |
| KIAA0368 | exon49 | chr9  | 114128498 | 114128627 | chr9:114128498-114128627  | 130 | 114128518 | 114128607 | chr9:114128518-114128607  | 90  | refseq KIAA0368 isoform1 exon49 NM_001080398 | 100,00 |
| KIAA0368 | exon48 | chr9  | 114128781 | 114128927 | chr9:114128781-114128927  | 147 | 114128801 | 114128907 | chr9:114128801-114128907  | 107 | refseq KIAA0368 isoform1 exon48 NM_001080398 | 100,00 |
| KIAA0368 | exon47 | chr9  | 114131294 | 114131473 | chr9:114131294-114131473  | 180 | 114131314 | 114131453 | chr9:114131314-114131453  | 140 | refseq KIAA0368 isoform1 exon47 NM_001080398 | 100,00 |
| KIAA0368 | exon46 | chr9  | 114132694 | 114132927 | chr9:114132694-114132927  | 234 | 114132714 | 114132907 | chr9:114132714-114132907  | 194 | refseq KIAA0368 isoform1 exon46 NM_001080398 | 100,00 |
| KIAA0368 | exon45 | chr9  | 114132981 | 114133065 | chr9:114132981-114133065  | 85  | 114133001 | 114133045 | chr9:114133001-114133045  | 45  | refseq KIAA0368 isoform1 exon45 NM_001080398 | 100,00 |
| KIAA0368 | exon44 | chr9  | 114133880 | 114134129 | chr9:114133880-114134129  | 250 | 114133900 | 114134109 | chr9:114133900-114134109  | 210 | refseq KIAA0368 isoform1 exon44 NM_001080398 | 100,00 |
| KIAA0368 | exon43 | chr9  | 114134688 | 114134920 | chr9:114134688-114134920  | 233 | 114134708 | 114134900 | chr9:114134708-114134900  | 193 | refseq KIAA0368 isoform1 exon43 NM_001080398 | 100,00 |
| KIAA0368 | exon42 | chr9  | 114135429 | 114135536 | chr9:114135429-114135536  | 108 | 114135449 | 114135516 | chr9:114135449-114135516  | 68  | refseq KIAA0368 isoform1 exon42 NM_001080398 | 100,00 |
| KIAA0368 | exon41 | chr9  | 114135574 | 114135706 | chr9:114135574-114135706  | 133 | 114135594 | 114135686 | chr9:114135594-114135686  | 93  | refseq KIAA0368 isoform1 exon41 NM_001080398 | 100,00 |
| KIAA0368 | exon40 | chr9  | 114136231 | 114136338 | chr9:114136231-114136338  | 108 | 114136251 | 114136318 | chr9:114136251-114136318  | 68  | refseq KIAA0368 isoform1 exon40 NM_001080398 | 100,00 |
| KIAA0368 | exon39 | chr9  | 114137372 | 114137502 | chr9:114137372-114137502  | 131 | 114137392 | 114137482 | chr9:114137392-114137482  | 91  | refseq KIAA0368 isoform1 exon39 NM_001080398 | 100,00 |
| KIAA0368 | exon38 | chr9  | 114138735 | 114138841 | chr9:114138735-114138841  | 107 | 114138755 | 114138821 | chr9:114138755-114138821  | 67  | refseq KIAA0368 isoform1 exon38 NM_001080398 | 100,00 |
| KIAA0368 | exon37 | chr9  | 114140839 | 114141030 | chr9:114140839-114141030  | 192 | 114140859 | 114141010 | chr9:114140859-114141010  | 152 | refseq KIAA0368 isoform1 exon37 NM_001080398 | 100,00 |
| KIAA0368 | exon36 | chr9  | 114145470 | 114145632 | chr9:114145470-114145632  | 163 | 114145490 | 114145612 | chr9:114145490-114145612  | 123 | refseq KIAA0368 isoform1 exon36 NM_001080398 | 100,00 |
| KIAA0368 | exon35 | chr9  | 114146781 | 114146869 | chr9:114146781-114146869  | 89  | 114146801 | 114146849 | chr9:114146801-114146849  | 49  | refseq KIAA0368 isoform1 exon35 NM_001080398 | 100,00 |
| KIAA0368 | exon34 | chr9  | 114147596 | 114147742 | chr9:114147596-114147742  | 147 | 114147616 | 114147722 | chr9:114147616-114147722  | 107 | refseq KIAA0368 isoform1 exon34 NM_001080398 | 100,00 |
| KIAA0368 | exon33 | chr9  | 114148636 | 114148756 | chr9:114148636-114148756  | 121 | 114148656 | 114148736 | chr9:114148656-114148736  | 81  | refseq KIAA0368 isoform1 exon33 NM_001080398 | 100,00 |
| KIAA0368 | exon32 | chr9  | 114151815 | 114152023 | chr9:114151815-114152023  | 209 | 114151835 | 114152003 | chr9:114151835-114152003  | 169 | refseq KIAA0368 isoform1 exon32 NM_001080398 | 100,00 |
| KIAA0368 | exon31 | chr9  | 114152243 | 114152401 | chr9:114152243-114152401  | 159 | 114152263 | 114152381 | chr9:114152263-114152381  | 119 | refseq KIAA0368 isoform1 exon31 NM_001080398 | 100,00 |
| KIAA0368 | exon30 | chr9  | 114154015 | 114154124 | chr9:114154015-114154124  | 110 | 114154035 | 114154104 | chr9:114154035-114154104  | 70  | refseq KIAA0368 isoform1 exon30 NM_001080398 | 100,00 |
| KIAA0368 | exon29 | chr9  | 114155027 | 114155182 | chr9:114155027-114155182  | 156 | 114155047 | 114155162 | chr9:114155047-114155162  | 116 | refseq KIAA0368 isoform1 exon29 NM_001080398 | 100,00 |
| KIAA0368 | exon28 | chr9  | 114155939 | 114156034 | chr9:114155939-114156034  | 96  | 114155959 | 114156014 | chr9:114155959-114156014  | 56  | refseq KIAA0368 isoform1 exon28 NM_001080398 | 100,00 |
| KIAA0368 | exon27 | chr9  | 114156419 | 114156605 | chr9:114156419-114156605  | 187 | 114156439 | 114156585 | chr9:114156439-114156585  | 147 | refseq KIAA0368 isoform1 exon27 NM_001080398 | 100,00 |
| KIAA0368 | exon26 | chr9  | 114159289 | 114159453 | chr9:114159289-114159453  | 165 | 114159309 | 114159433 | chr9:114159309-114159433  | 125 | refseq KIAA0368 isoform1 exon26 NM_001080398 | 100,00 |
| KIAA0368 | exon25 | chr9  | 114170830 | 114170972 | chr9:114170830-114170972  | 143 | 114170850 | 114170952 | chr9:114170850-114170952  | 103 | refseq KIAA0368 isoform1 exon25 NM_001080398 | 100,00 |
| KIAA0368 | exon24 | chr9  | 114172300 | 114172513 | chr9:114172300-114172513  | 214 | 114172320 | 114172493 | chr9:114172320-114172493  | 174 | refseq KIAA0368 isoform1 exon24 NM_001080398 | 100,00 |
| KIAA0368 | exon23 | chr9  | 114173239 | 114173442 | chr9:114173239-114173442  | 204 | 114173259 | 114173422 | chr9:114173259-114173422  | 164 | refseq KIAA0368 isoform1 exon23 NM_001080398 | 100,00 |
| KIAA0368 | exon22 | chr9  | 114174273 | 114174448 | chr9:114174273-114174448  | 176 | 114174293 | 114174428 | chr9:114174293-114174428  | 136 | refseq KIAA0368 isoform1 exon22 NM_001080398 | 100,00 |
| KIAA0368 | exon21 | chr9  | 114176154 | 114176286 | chr9:114176154-114176286  | 133 | 114176174 | 114176266 | chr9:114176174-114176266  | 93  | refseq KIAA0368 isoform1 exon21 NM_001080398 | 100,00 |
| KIAA0368 | exon20 | chr9  | 114176688 | 114176951 | chr9:114176688-114176951  | 264 | 114176708 | 114176931 | chr9:114176708-114176931  | 224 | refseq KIAA0368 isoform1 exon20 NM_001080398 | 100,00 |
| KIAA0368 | exon19 | chr9  | 114178531 | 114178652 | chr9:114178531-114178652  | 122 | 114178551 | 114178632 | chr9:114178551-114178632  | 82  | refseq KIAA0368 isoform1 exon19 NM_001080398 | 100,00 |
| KIAA0368 | exon18 | chr9  | 114180142 | 114180306 | chr9:114180142-114180306  | 165 | 114180162 | 114180286 | chr9:114180162-114180286  | 125 | refseq KIAA0368 isoform1 exon18 NM_001080398 | 100,00 |
| KIAA0368 | exon17 | chr9  | 114182276 | 114182420 | chr9:114182276-114182420  | 145 | 114182296 | 114182400 | chr9:114182296-114182400  | 105 | refseq KIAA0368 isoform1 exon17 NM_001080398 | 100,00 |
| KIAA0368 | exon16 | chr9  | 114184180 | 114184343 | chr9:114184180-114184343  | 164 | 114184200 | 114184323 | chr9:114184200-114184323  | 124 | refseq KIAA0368 isoform1 exon16 NM_001080398 | 100,00 |
| KIAA0368 | exon15 | chr9  | 114184393 | 114184500 | chr9:114184393-114184500  | 108 | 114184413 | 114184480 | chr9:114184413-114184480  | 68  | refseq KIAA0368 isoform1 exon15 NM_001080398 | 100,00 |
| KIAA0368 | exon14 | chr9  | 114185458 | 114185548 | chr9:114185458-114185548  | 91  | 114185478 | 114185528 | chr9:114185478-114185528  | 51  | refseq KIAA0368 isoform1 exon14 NM_001080398 | 100,00 |
| KIAA0368 | exon13 | chr9  | 114187677 | 114187796 | chr9:114187677-114187796  | 120 | 114187697 | 114187776 | chr9:114187697-114187776  | 80  | refseq KIAA0368 isoform1 exon13 NM_001080398 | 100,00 |
| KIAA0368 | exon12 | chr9  | 114188002 | 114188128 | chr9:114188002-114188128  | 127 | 114188022 | 114188108 | chr9:114188022-114188108  | 87  | refseq KIAA0368 isoform1 exon12 NM_001080398 | 100,00 |
| KIAA0368 | exon11 | chr9  | 114190301 | 114190461 | chr9:114190301-114190461  | 161 | 114190321 | 114190441 | chr9:114190321-114190441  | 121 | refseq KIAA0368 isoform1 exon11 NM_001080398 | 100,00 |
| KIAA0368 | exon10 | chr9  | 114192806 | 114192928 | chr9:114192806-114192928  | 123 | 114192826 | 114192908 | chr9:114192826-114192908  | 83  | refseq KIAA0368 isoform1 exon10 NM_001080398 | 100,00 |
| KIAA0368 | exon9  | chr9  | 114195492 | 114195672 | chr9:114195492-114195672  | 181 | 114195512 | 114195652 | chr9:114195512-114195652  | 141 | refseq KIAA0368 isoform1 exon9 NM_001080398  | 100,00 |
| KIAA0368 | exon8  | chr9  | 114199199 | 114199408 | chr9:114199199-114199408  | 210 | 114199219 | 114199388 | chr9:114199219-114199388  | 170 | refseq KIAA0368 isoform1 exon8 NM_001080398  | 100,00 |
| KIAA0368 | exon7  | chr9  | 114202631 | 114202821 | chr9:114202631-114202821  | 191 | 114202651 | 114202801 | chr9:114202651-114202801  | 151 | refseq KIAA0368 isoform1 exon7 NM_001080398  | 100,00 |
| KIAA0368 | exon6  | chr9  | 114204565 | 114204724 | chr9:114204565-114204724  | 160 | 114204585 | 114204704 | chr9:114204585-114204704  | 120 | refseq KIAA0368 isoform1 exon6 NM_001080398  | 100,00 |
| KIAA0368 | exon5  | chr9  | 114206637 | 114206794 | chr9:114206637-114206794  | 158 | 114206657 | 114206774 | chr9:114206657-114206774  | 118 | refseq KIAA0368 isoform1 exon5 NM_001080398  | 100,00 |
| KIAA0368 | exon4  | chr9  | 114213684 | 114213855 | chr9:114213684-114213855  | 172 | 114213704 | 114213835 | chr9:114213704-114213835  | 132 | refseq KIAA0368 isoform1 exon4 NM_001080398  | 100,00 |
| KIAA0368 | exon2  | chr9  | 114246613 | 114246848 | chr9:114246613-114246848  | 236 | 114246633 | 114246828 | chr9:114246633-114246828  | 196 | refseq KIAA0368 isoform1 exon2 NM_001080398  | 100,00 |
| KIF26A   | exon1  | chr14 | 104605039 | 104605121 | chr14:104605039-104605121 | 83  | 104605059 | 104605101 | chr14:104605059-104605101 | 43  | refseq KIF26A isoform1 exon1 NM_015656       | 100,00 |
| KIF26A   | exon2  | chr14 | 104605359 | 104605645 | chr14:104605359-104605645 | 287 | 104605379 | 104605625 | chr14:104605379-104605625 | 247 | refseq KIF26A isoform1 exon2 NM_015656       | 100,00 |
| KIF26A   | exon3  | chr14 | 104618331 | 104618818 | chr14:104618331-104618818 | 488 | 104618351 | 104618798 | chr14:104618351-104618798 | 448 | refseq KIF26A isoform1 exon3 NM_015656       | 100,00 |
| KIF26A   | exon4  | chr14 | 104624071 | 104624299 | chr14:104624071-104624299 | 229 | 104624091 | 104624279 | chr14:104624091-104624279 | 189 | refseq KIF26A isoform1 exon4 NM_015656       | 100,00 |
| KIF26A   | exon5  | chr14 | 104633175 | 104633405 | chr14:104633175-104633405 | 231 | 104633195 | 104633385 | chr14:104633195-104633385 | 191 | refseq KIF26A isoform1 exon5 NM_015656       | 100,00 |
| KIF26A   | exon6  | chr14 | 104638039 | 104638292 | chr14:104638039-104638292 | 254 | 104638059 | 104638272 | chr14:104638059-104638272 | 214 | refseq KIF26A isoform1 exon6 NM_015656       | 100,00 |
| KIF26A   | exon7  | chr14 | 104638891 | 104639025 | chr14:104638891-104639025 | 135 | 104638911 | 104639005 | chr14:104638911-104639005 | 95  | refseq KIF26A isoform1 exon7 NM_015656       | 100,00 |
| KIF26A   | exon8  | chr14 | 104639293 | 104639596 | chr14:104639293-104639596 | 304 | 104639313 | 104639576 | chr14:104639313-104639576 | 264 | refseq KIF26A isoform1 exon8 NM_015656       | 100,00 |
| KIF26A   | exon9  | chr14 | 104639646 | 104639870 | chr14:104639646-104639870 | 225 | 104639666 | 104639850 | chr14:104639666-104639850 | 185 | refseq KIF26A isoform1 exon9 NM_015656       | 100,00 |
| KIF26A   | exon10 | chr14 | 104640022 | 104640225 | chr14:104640022-104640225 | 204 | 104640042 | 104640205 | chr14:104640042-104640205 | 164 | refseq KIF26A isoform1 exon10 NM_015656      | 100,00 |
| KIF26A   | exon11 | chr14 | 104640464 | 104640667 | chr14:104640464-104640667 | 204 | 104640484 | 104640648 | chr14:104640484-104640648 |     |                                              |        |

|      |                   |          |          |                        |     |          |          |                        |     |                                                                     |        |
|------|-------------------|----------|----------|------------------------|-----|----------|----------|------------------------|-----|---------------------------------------------------------------------|--------|
| MTA3 | exon4 exon2 chr2  | 42836577 | 42836744 | chr2:42836577-42836744 | 168 | 42836597 | 42836724 | chr2:42836597-42836724 | 128 | refseq MTA3  isoforme1 isoforme2 is NM_020744, NM_001282756, NM_00: | 100,00 |
| MTA3 | exon5 exon3 chr2  | 42867292 | 42867396 | chr2:42867292-42867396 | 105 | 42867312 | 42867376 | chr2:42867312-42867376 | 65  | refseq MTA3  isoforme1 isoforme2 is NM_020744, NM_001282756, NM_00: | 100,00 |
| MTA3 | exon6 exon4 chr2  | 42871246 | 42871404 | chr2:42871246-42871404 | 159 | 42871266 | 42871384 | chr2:42871266-42871384 | 119 | refseq MTA3  isoforme1 isoforme2 is NM_020744, NM_001282756, NM_00: | 100,00 |
| MTA3 | exon7 exon5 chr2  | 42883319 | 42883462 | chr2:42883319-42883462 | 144 | 42883339 | 42883442 | chr2:42883339-42883442 | 104 | refseq MTA3  isoforme1 isoforme2 is NM_020744, NM_001282756, NM_00: | 100,00 |
| MTA3 | exon8 exon6 chr2  | 42886882 | 42887022 | chr2:42886882-42887022 | 141 | 42886902 | 42887002 | chr2:42886902-42887002 | 101 | refseq MTA3  isoforme1 isoforme2 is NM_020744, NM_001282756, NM_00: | 100,00 |
| MTA3 | exon9 exon7 chr2  | 42909520 | 42909749 | chr2:42909520-42909749 | 230 | 42909540 | 42909729 | chr2:42909540-42909729 | 190 | refseq MTA3  isoforme1 isoforme2 is NM_020744, NM_001282756, NM_00: | 100,00 |
| MTA3 | exon10 exon8 chr2 | 42922884 | 42922999 | chr2:42922884-42922999 | 116 | 42922904 | 42922979 | chr2:42922904-42922979 | 76  | refseq MTA3  isoforme1 isoforme2 is NM_020744, NM_001282756, NM_00: | 100,00 |
| MTA3 | exon11 exon9 chr2 | 42924895 | 42924994 | chr2:42924895-42924994 | 100 | 42924915 | 42924974 | chr2:42924915-42924974 | 60  | refseq MTA3  isoforme1 isoforme2 is NM_020744, NM_001282756, NM_00: | 100,00 |
| MTA3 | chr2              | 42931313 | 42931478 | chr2:42931313-42931478 | 166 | 42931333 | 42931458 | chr2:42931333-42931458 | 126 | refseq MTA3  isoforme1 isoforme2 is NM_020744, NM_001282756, NM_00: | 100,00 |
| MTA3 | exon13 exon1 chr2 | 42935022 | 42935214 | chr2:42935022-42935214 | 193 | 42935042 | 42935194 | chr2:42935042-42935194 | 153 | refseq MTA3  isoforme1 isoforme2 is NM_020744, NM_001282756, NM_00: | 100,00 |
| MTA3 | exon14 chr2       | 42935993 | 42936279 | chr2:42935993-42936279 | 287 | 42936013 | 42936259 | chr2:42936013-42936259 | 247 | refseq MTA3  isoforme1 isoforme2 is NM_020744, NM_001282756, NM_00: | 100,00 |
| MTA3 | exon13 exon1 chr2 | 42946107 | 42946234 | chr2:42946107-42946234 | 128 | 42946127 | 42946214 | chr2:42946127-42946214 | 88  | refseq MTA3  isoforme1 isoforme2 is NM_020744, NM_001282756, NM_00: | 100,00 |
| MTA3 | exon14 exon1 chr2 | 42950008 | 42950195 | chr2:42950008-42950195 | 188 | 42950028 | 42950175 | chr2:42950028-42950175 | 148 | refseq MTA3  isoforme1 isoforme2 is NM_020744, NM_001282756, NM_00: | 100,00 |
| MTA3 | exon15 exon1 chr2 | 42980493 | 42980559 | chr2:42980493-42980559 | 67  | 42980513 | 42980539 | chr2:42980513-42980539 | 27  | refseq MTA3  isoforme1 isoforme2 is NM_020744, NM_001282756, NM_00: | 100,00 |
| MTOR | exon57 chr1       | 11167521 | 11167577 | chr1:11167521-11167577 | 57  | 11167541 | 11167557 | chr1:11167541-11167557 | 17  | refseq MTOR  isoforme1 isoforme2 is NM_004958, NM_001242539, NM_00: | 100,00 |
| MTOR | exon56 chr1       | 11168217 | 11168363 | chr1:11168217-11168363 | 147 | 11168237 | 11168343 | chr1:11168237-11168343 | 107 | refseq MTOR  isoforme1 isoforme2 is NM_004958, NM_001242539, NM_00: | 100,00 |
| MTOR | exon55 chr1       | 11169326 | 11169447 | chr1:11169326-11169447 | 122 | 11169346 | 11169427 | chr1:11169346-11169427 | 82  | refseq MTOR  isoforme1 isoforme2 is NM_004958, NM_001242539, NM_00: | 100,00 |
| MTOR | exon54 chr1       | 11169685 | 11169806 | chr1:11169685-11169806 | 122 | 11169705 | 11169786 | chr1:11169705-11169786 | 82  | refseq MTOR  isoforme1 isoforme2 is NM_004958, NM_001242539, NM_00: | 100,00 |
| MTOR | exon53 chr1       | 11172888 | 11172994 | chr1:11172888-11172994 | 107 | 11172908 | 11172979 | chr1:11172908-11172979 | 67  | refseq MTOR  isoforme1 isoforme2 is NM_004958, NM_001242539, NM_00: | 100,00 |
| MTOR | exon52 chr1       | 11174354 | 11174530 | chr1:11174354-11174530 | 177 | 11174374 | 11174510 | chr1:11174374-11174510 | 137 | refseq MTOR  isoforme1 isoforme2 is NM_004958, NM_001242539, NM_00: | 100,00 |
| MTOR | exon51 chr1       | 11174849 | 11174964 | chr1:11174849-11174964 | 116 | 11174869 | 11174944 | chr1:11174869-11174944 | 76  | refseq MTOR  isoforme1 isoforme2 is NM_004958, NM_001242539, NM_00: | 100,00 |
| MTOR | exon50 chr1       | 11175432 | 11175545 | chr1:11175432-11175545 | 114 | 11175452 | 11175525 | chr1:11175452-11175525 | 74  | refseq MTOR  isoforme1 isoforme2 is NM_004958, NM_001242539, NM_00: | 100,00 |
| MTOR | exon49 chr1       | 11177040 | 11177163 | chr1:11177040-11177163 | 124 | 11177060 | 11177143 | chr1:11177060-11177143 | 84  | refseq MTOR  isoforme1 isoforme2 is NM_004958, NM_001242539, NM_00: | 100,00 |
| MTOR | exon48 chr1       | 11181282 | 11181445 | chr1:11181282-11181445 | 164 | 11181302 | 11181425 | chr1:11181302-11181425 | 124 | refseq MTOR  isoforme1 isoforme2 is NM_004958, NM_001242539, NM_00: | 100,00 |
| MTOR | exon47 chr1       | 11182015 | 11182203 | chr1:11182015-11182203 | 189 | 11182035 | 11182183 | chr1:11182035-11182183 | 149 | refseq MTOR  isoforme1 isoforme2 is NM_004958, NM_001242539, NM_00: | 100,00 |
| MTOR | exon46 chr1       | 11184534 | 11184710 | chr1:11184534-11184710 | 177 | 11184554 | 11184690 | chr1:11184554-11184690 | 137 | refseq MTOR  isoforme1 isoforme2 is NM_004958, NM_001242539, NM_00: | 100,00 |
| MTOR | exon45 chr1       | 11186658 | 11186873 | chr1:11186658-11186873 | 216 | 11186678 | 11186853 | chr1:11186678-11186853 | 176 | refseq MTOR  isoforme1 isoforme2 is NM_004958, NM_001242539, NM_00: | 100,00 |
| MTOR | exon44 chr1       | 11187046 | 11187221 | chr1:11187046-11187221 | 176 | 11187066 | 11187202 | chr1:11187066-11187202 | 136 | refseq MTOR  isoforme1 isoforme2 is NM_004958, NM_001242539, NM_00: | 100,00 |
| MTOR | exon43 chr1       | 11187660 | 11187883 | chr1:11187660-11187883 | 224 | 11187680 | 11187863 | chr1:11187680-11187863 | 184 | refseq MTOR  isoforme1 isoforme2 is NM_004958, NM_001242539, NM_00: | 100,00 |
| MTOR | exon42 chr1       | 11188040 | 11188203 | chr1:11188040-11188203 | 164 | 11188060 | 11188183 | chr1:11188060-11188183 | 124 | refseq MTOR  isoforme1 isoforme2 is NM_004958, NM_001242539, NM_00: | 100,00 |
| MTOR | exon41 chr1       | 11188490 | 11188629 | chr1:11188490-11188629 | 140 | 11188510 | 11188609 | chr1:11188510-11188609 | 100 | refseq MTOR  isoforme1 isoforme2 is NM_004958, NM_001242539, NM_00: | 100,00 |
| MTOR | exon40 chr1       | 11188891 | 11189028 | chr1:11188891-11189028 | 138 | 11188911 | 11189008 | chr1:11188911-11189008 | 98  | refseq MTOR  isoforme1 isoforme2 is NM_004958, NM_001242539, NM_00: | 100,00 |
| MTOR | exon39 chr1       | 11189774 | 11189915 | chr1:11189774-11189915 | 142 | 11189794 | 11189915 | chr1:11189794-11189915 | 102 | refseq MTOR  isoforme1 isoforme2 is NM_004958, NM_001242539, NM_00: | 100,00 |
| MTOR | exon38 chr1       | 11190565 | 11190854 | chr1:11190565-11190854 | 290 | 11190585 | 11190834 | chr1:11190585-11190834 | 250 | refseq MTOR  isoforme1 isoforme2 is NM_004958, NM_001242539, NM_00: | 100,00 |
| MTOR | exon37 chr1       | 11193116 | 11193274 | chr1:11193116-11193274 | 159 | 11193136 | 11193254 | chr1:11193136-11193254 | 119 | refseq MTOR  isoforme1 isoforme2 is NM_004958, NM_001242539, NM_00: | 100,00 |
| MTOR | exon36 chr1       | 11194387 | 11194543 | chr1:11194387-11194543 | 157 | 11194407 | 11194523 | chr1:11194407-11194523 | 117 | refseq MTOR  isoforme1 isoforme2 is NM_004958, NM_001242539, NM_00: | 100,00 |
| MTOR | exon35 chr1       | 11199340 | 11199512 | chr1:11199340-11199512 | 173 | 11199360 | 11199492 | chr1:11199360-11199492 | 133 | refseq MTOR  isoforme1 isoforme2 is NM_004958, NM_001242539, NM_00: | 100,00 |
| MTOR | exon34 chr1       | 11199569 | 11199735 | chr1:11199569-11199735 | 167 | 11199589 | 11199715 | chr1:11199589-11199715 | 127 | refseq MTOR  isoforme1 isoforme2 is NM_004958, NM_001242539, NM_00: | 100,00 |
| MTOR | exon33 chr1       | 11204684 | 11204832 | chr1:11204684-11204832 | 149 | 11204704 | 11204812 | chr1:11204704-11204812 | 109 | refseq MTOR  isoforme1 isoforme2 is NM_004958, NM_001242539, NM_00: | 100,00 |
| MTOR | exon32 chr1       | 11205004 | 11205122 | chr1:11205004-11205122 | 119 | 11205024 | 11205102 | chr1:11205024-11205102 | 79  | refseq MTOR  isoforme1 isoforme2 is NM_004958, NM_001242539, NM_00: | 100,00 |
| MTOR | exon31 chr1       | 11206712 | 11206868 | chr1:11206712-11206868 | 157 | 11206732 | 11206848 | chr1:11206732-11206848 | 117 | refseq MTOR  isoforme1 isoforme2 is NM_004958, NM_001242539, NM_00: | 100,00 |
| MTOR | exon30 chr1       | 11210162 | 11210303 | chr1:11210162-11210303 | 142 | 11210182 | 11210283 | chr1:11210182-11210283 | 102 | refseq MTOR  isoforme1 isoforme2 is NM_004958, NM_001242539, NM_00: | 100,00 |
| MTOR | exon29 chr1       | 11217188 | 11217368 | chr1:11217188-11217368 | 181 | 11217208 | 11217348 | chr1:11217208-11217348 | 141 | refseq MTOR  isoforme1 isoforme2 is NM_004958, NM_001242539, NM_00: | 100,00 |
| MTOR | exon28 chr1       | 11227478 | 11227594 | chr1:11227478-11227594 | 117 | 11227498 | 11227574 | chr1:11227498-11227574 | 77  | refseq MTOR  isoforme1 isoforme2 is NM_004958, NM_001242539, NM_00: | 100,00 |
| MTOR | exon27 chr1       | 11259294 | 11259480 | chr1:11259294-11259480 | 187 | 11259314 | 11259460 | chr1:11259314-11259460 | 147 | refseq MTOR  isoforme1 isoforme2 is NM_004958, NM_001242539, NM_00: | 100,00 |
| MTOR | exon26 chr1       | 11259577 | 11259780 | chr1:11259577-11259780 | 204 | 11259597 | 11259760 | chr1:11259597-11259760 | 164 | refseq MTOR  isoforme1 isoforme2 is NM_004958, NM_001242539, NM_00: | 100,00 |
| MTOR | exon25 chr1       | 11264597 | 11264780 | chr1:11264597-11264780 | 184 | 11264617 | 11264760 | chr1:11264617-11264760 | 144 | refseq MTOR  isoforme1 isoforme2 is NM_004958, NM_001242539, NM_00: | 100,00 |
| MTOR | exon24 chr1       | 11269348 | 11269535 | chr1:11269348-11269535 | 188 | 11269368 | 11269515 | chr1:11269368-11269515 | 148 | refseq MTOR  isoforme1 isoforme2 is NM_004958, NM_001242539, NM_00: | 100,00 |
| MTOR | exon23 chr1       | 11270850 | 11270983 | chr1:11270850-11270983 | 134 | 11270870 | 11270963 | chr1:11270870-11270963 | 94  | refseq MTOR  isoforme1 isoforme2 is NM_004958, NM_001242539, NM_00: | 100,00 |
| MTOR | exon22 chr1       | 11272348 | 11272551 | chr1:11272348-11272551 | 204 | 11272368 | 11272531 | chr1:11272368-11272531 | 164 | refseq MTOR  isoforme1 isoforme2 is NM_004958, NM_001242539, NM_00: | 100,00 |
| MTOR | exon21 chr1       | 11272832 | 11272985 | chr1:11272832-11272985 | 154 | 11272852 | 11272965 | chr1:11272852-11272965 | 114 | refseq MTOR  isoforme1 isoforme2 is NM_004958, NM_001242539, NM_00: | 100,00 |
| MTOR | exon20 chr1       | 11273435 | 11273643 | chr1:11273435-11273643 | 209 | 11273455 | 11273623 | chr1:11273455-11273623 | 169 | refseq MTOR  isoforme1 isoforme2 is NM_004958, NM_001242539, NM_00: | 100,00 |
| MTOR | exon19 chr1       | 11276184 | 11276311 | chr1:11276184-11276311 | 128 | 11276204 | 11276291 | chr1:11276204-11276291 | 88  | refseq MTOR  isoforme1 isoforme2 is NM_004958, NM_001242539, NM_00: | 100,00 |
| MTOR | exon18 chr1       | 11288704 | 11288995 | chr1:11288704-11288995 | 292 | 11288724 | 11288975 | chr1:11288724-11288975 | 252 | refseq MTOR  isoforme1 isoforme2 is NM_004958, NM_001242539, NM_00: | 100,00 |
| MTOR | exon17 chr1       | 11290961 | 11291131 | chr1:11290961-11291131 | 171 | 11290981 | 11291111 | chr1:11290981-11291111 | 131 | refseq MTOR  isoforme1 isoforme2 is NM_004958, NM_001242539, NM_00: | 100,00 |
| MTOR | exon16 chr1       | 11291336 | 11291511 | chr1:11291336-11291511 | 176 | 11291356 | 11291491 | chr1:11291356-11291491 | 136 | refseq MTOR  isoforme1 isoforme2 is NM_004958, NM_001242539, NM_00: | 100,00 |
| MTOR | exon15 chr1       | 11292472 | 11292605 | chr1:11292472-11292605 | 134 | 11292492 | 11292585 | chr1:11292492-11292585 | 94  | refseq MTOR  isoforme1 isoforme2 is NM_004958, NM_001242539, NM_00: | 100,00 |
| MTOR | exon14 chr1       | 11293434 | 11293564 | chr1:11293434-11293564 | 131 | 11293454 | 11293544 | chr1:11293454-11293544 | 91  | refseq MTOR  isoforme1 isoforme2 is NM_004958, NM_001242539, NM_00: | 100,00 |
| MTOR | exon13 chr1       | 11294179 | 11294342 | chr1:11294179-11294342 | 164 | 11294199 | 11294322 | chr1:11294199-11294322 | 124 | refseq MTOR  isoforme1 isoforme2 is NM_004958, NM_001242539, NM_00: | 100,00 |
| MTOR | exon12 chr1       | 11297879 | 11298125 | chr1:11297879-11298125 | 247 | 11297899 | 11298105 | chr1:11297899-11298105 | 207 | refseq MTOR  isoforme1 isoforme2 is NM_004958, NM_001242539, NM_00: | 100,00 |
| MTOR | exon11 chr1       | 11298438 | 11298694 | chr1:11298438-11298694 | 257 | 11298458 | 11298674 | chr1:11298458-11298674 | 217 | refseq MTOR  isoforme1 isoforme2 is NM_004958, NM_001242539, NM_00: | 100,00 |
| MTOR | exon10 chr1       | 11300339 | 11300624 | chr1:11300339-11300624 | 286 | 11300359 | 11300604 | chr1:11300359-11300604 | 246 | refseq MTOR  isoforme1 isoforme2 is NM_004958, NM_001242539, NM_00: | 100,00 |
| MTOR | exon9 chr1        | 11301589 | 11301758 | chr1:11301589-11301758 | 170 | 11301609 | 11301738 | chr1:11301609-11301738 | 130 | refseq MTOR  isoforme1 isoforme2 is NM_004958, NM_001242539, NM_00: | 100,00 |
| MTOR | exon8 chr1        | 11303150 | 1130337  |                        |     |          |          |                        |     |                                                                     |        |

|        |                   |           |           |                          |      |           |           |                          |      |                                                          |        |
|--------|-------------------|-----------|-----------|--------------------------|------|-----------|-----------|--------------------------|------|----------------------------------------------------------|--------|
| NIPBL  | exon16 exon1 chr5 | 37006438  | 37006710  | chr5:37006438-37006710   | 273  | 37006458  | 37006690  | chr5:37006458-37006690   | 233  | refseq NIPBL isoforme1 isoforme2 :e:NM_133433, NM_015384 | 100,00 |
| NIPBL  | exon17 exon1 chr5 | 37007404  | 37007596  | chr5:37007404-37007596   | 193  | 37007424  | 37007576  | chr5:37007424-37007576   | 153  | refseq NIPBL isoforme1 isoforme2 :e:NM_133433, NM_015384 | 100,00 |
| NIPBL  | exon18 exon1 chr5 | 37008089  | 37008210  | chr5:37008089-37008210   | 122  | 37008109  | 37008190  | chr5:37008109-37008190   | 82   | refseq NIPBL isoforme1 isoforme2 :e:NM_133433, NM_015384 | 100,00 |
| NIPBL  | exon19 exon1 chr5 | 37008704  | 37008845  | chr5:37008704-37008845   | 142  | 37008724  | 37008825  | chr5:37008724-37008825   | 102  | refseq NIPBL isoforme1 isoforme2 :e:NM_133433, NM_015384 | 100,00 |
| NIPBL  | exon20 exon2 chr5 | 37010168  | 37010347  | chr5:37010168-37010347   | 180  | 37010188  | 37010327  | chr5:37010188-37010327   | 140  | refseq NIPBL isoforme1 isoforme2 :e:NM_133433, NM_015384 | 100,00 |
| NIPBL  | exon21 exon2 chr5 | 37014764  | 37014887  | chr5:37014764-37014887   | 124  | 37014784  | 37014867  | chr5:37014784-37014867   | 84   | refseq NIPBL isoforme1 isoforme2 :e:NM_133433, NM_015384 | 100,00 |
| NIPBL  | exon22 exon2 chr5 | 37016119  | 37016292  | chr5:37016119-37016292   | 174  | 37016139  | 37016272  | chr5:37016139-37016272   | 134  | refseq NIPBL isoforme1 isoforme2 :e:NM_133433, NM_015384 | 100,00 |
| NIPBL  | exon23 exon2 chr5 | 37017100  | 37017284  | chr5:37017100-37017284   | 185  | 37017120  | 37017264  | chr5:37017120-37017264   | 145  | refseq NIPBL isoforme1 isoforme2 :e:NM_133433, NM_015384 | 100,00 |
| NIPBL  | exon24 exon2 chr5 | 37019392  | 37019522  | chr5:37019392-37019522   | 131  | 37019412  | 37019502  | chr5:37019412-37019502   | 91   | refseq NIPBL isoforme1 isoforme2 :e:NM_133433, NM_015384 | 100,00 |
| NIPBL  | exon25 exon2 chr5 | 37020540  | 37020795  | chr5:37020540-37020795   | 256  | 37020560  | 37020775  | chr5:37020560-37020775   | 216  | refseq NIPBL isoforme1 isoforme2 :e:NM_133433, NM_015384 | 100,00 |
| NIPBL  | exon26 exon2 chr5 | 37020856  | 37020999  | chr5:37020856-37020999   | 144  | 37020876  | 37020979  | chr5:37020876-37020979   | 104  | refseq NIPBL isoforme1 isoforme2 :e:NM_133433, NM_015384 | 100,00 |
| NIPBL  | exon27 exon2 chr5 | 37022132  | 37022271  | chr5:37022132-37022271   | 140  | 37022152  | 37022251  | chr5:37022152-37022251   | 100  | refseq NIPBL isoforme1 isoforme2 :e:NM_133433, NM_015384 | 100,00 |
| NIPBL  | exon28 exon2 chr5 | 37022325  | 37022512  | chr5:37022325-37022512   | 188  | 37022345  | 37022492  | chr5:37022345-37022492   | 148  | refseq NIPBL isoforme1 isoforme2 :e:NM_133433, NM_015384 | 100,00 |
| NIPBL  | exon29 exon2 chr5 | 37024666  | 37024841  | chr5:37024666-37024841   | 176  | 37024686  | 37024821  | chr5:37024686-37024821   | 136  | refseq NIPBL isoforme1 isoforme2 :e:NM_133433, NM_015384 | 100,00 |
| NIPBL  | exon30 exon3 chr5 | 37026310  | 37026449  | chr5:37026310-37026449   | 140  | 37026330  | 37026429  | chr5:37026330-37026429   | 100  | refseq NIPBL isoforme1 isoforme2 :e:NM_133433, NM_015384 | 100,00 |
| NIPBL  | exon31 exon3 chr5 | 37027440  | 37027534  | chr5:37027440-37027534   | 95   | 37027460  | 37027514  | chr5:37027460-37027514   | 55   | refseq NIPBL isoforme1 isoforme2 :e:NM_133433, NM_015384 | 100,00 |
| NIPBL  | exon32 exon3 chr5 | 37036460  | 37036609  | chr5:37036460-37036609   | 150  | 37036480  | 37036589  | chr5:37036480-37036589   | 110  | refseq NIPBL isoforme1 isoforme2 :e:NM_133433, NM_015384 | 100,00 |
| NIPBL  | exon33 exon3 chr5 | 37038683  | 37038860  | chr5:37038683-37038860   | 178  | 37038703  | 37038840  | chr5:37038703-37038840   | 138  | refseq NIPBL isoforme1 isoforme2 :e:NM_133433, NM_015384 | 100,00 |
| NIPBL  | exon34 exon3 chr5 | 37044428  | 37044609  | chr5:37044428-37044609   | 182  | 37044448  | 37044589  | chr5:37044448-37044589   | 142  | refseq NIPBL isoforme1 isoforme2 :e:NM_133433, NM_015384 | 100,00 |
| NIPBL  | exon35 exon3 chr5 | 37044717  | 37044851  | chr5:37044717-37044851   | 135  | 37044737  | 37044831  | chr5:37044737-37044831   | 95   | refseq NIPBL isoforme1 isoforme2 :e:NM_133433, NM_015384 | 100,00 |
| NIPBL  | exon36 exon3 chr5 | 37045524  | 37045719  | chr5:37045524-37045719   | 196  | 37045544  | 37045699  | chr5:37045544-37045699   | 156  | refseq NIPBL isoforme1 isoforme2 :e:NM_133433, NM_015384 | 100,00 |
| NIPBL  | exon37 exon3 chr5 | 37046190  | 37046321  | chr5:37046190-37046321   | 132  | 37046210  | 37046301  | chr5:37046210-37046301   | 92   | refseq NIPBL isoforme1 isoforme2 :e:NM_133433, NM_015384 | 100,00 |
| NIPBL  | exon38 exon3 chr5 | 37048583  | 37048797  | chr5:37048583-37048797   | 215  | 37048603  | 37048777  | chr5:37048603-37048777   | 175  | refseq NIPBL isoforme1 isoforme2 :e:NM_133433, NM_015384 | 100,00 |
| NIPBL  | exon39 exon3 chr5 | 37049192  | 37049423  | chr5:37049192-37049423   | 232  | 37049212  | 37049403  | chr5:37049212-37049403   | 192  | refseq NIPBL isoforme1 isoforme2 :e:NM_133433, NM_015384 | 100,00 |
| NIPBL  | exon40 exon4 chr5 | 37051860  | 37052008  | chr5:37051860-37052008   | 149  | 37051880  | 37051988  | chr5:37051880-37051988   | 109  | refseq NIPBL isoforme1 isoforme2 :e:NM_133433, NM_015384 | 100,00 |
| NIPBL  | exon41 exon4 chr5 | 37052447  | 37052688  | chr5:37052447-37052688   | 242  | 37052467  | 37052668  | chr5:37052467-37052668   | 202  | refseq NIPBL isoforme1 isoforme2 :e:NM_133433, NM_015384 | 100,00 |
| NIPBL  | exon42 exon4 chr5 | 37057267  | 37057454  | chr5:37057267-37057454   | 188  | 37057287  | 37057434  | chr5:37057287-37057434   | 148  | refseq NIPBL isoforme1 isoforme2 :e:NM_133433, NM_015384 | 100,00 |
| NIPBL  | exon43 exon4 chr5 | 37058972  | 37059287  | chr5:37058972-37059287   | 316  | 37058992  | 37059267  | chr5:37058992-37059267   | 276  | refseq NIPBL isoforme1 isoforme2 :e:NM_133433, NM_015384 | 100,00 |
| NIPBL  | exon44 exon4 chr5 | 37060925  | 37061140  | chr5:37060925-37061140   | 216  | 37060945  | 37061120  | chr5:37060945-37061120   | 176  | refseq NIPBL isoforme1 isoforme2 :e:NM_133433, NM_015384 | 100,00 |
| NIPBL  | exon45 chr5       | 37063871  | 37064145  | chr5:37063871-37064145   | 275  | 37063891  | 37064125  | chr5:37063891-37064125   | 235  | refseq NIPBL isoforme2 :exon45 ext:NM_015384             | 100,00 |
| NIPBL  | exon46 chr5       | 37064608  | 37065014  | chr5:37064608-37065014   | 407  | 37064628  | 37064994  | chr5:37064628-37064994   | 367  | refseq NIPBL isoforme2 :exon46 ext:NM_133433             | 100,00 |
| NOTCH1 | exon34 chr9       | 139390502 | 139392030 | chr9:139390502-139392030 | 1529 | 139390522 | 139392010 | chr9:139390522-139392010 | 1489 | refseq NOTCH1 isoforme1 :exon34 NM_017617                | 100,00 |
| NOTCH1 | exon33 chr9       | 139393330 | 139393468 | chr9:139393330-139393468 | 139  | 139393350 | 139393448 | chr9:139393350-139393448 | 99   | refseq NOTCH1 isoforme1 :exon33 NM_017617                | 100,00 |
| NOTCH1 | exon32 chr9       | 139393543 | 139393731 | chr9:139393543-139393731 | 189  | 139393563 | 139393711 | chr9:139393563-139393711 | 149  | refseq NOTCH1 isoforme1 :exon32 NM_017617                | 100,00 |
| NOTCH1 | exon31 chr9       | 139394983 | 139395319 | chr9:139394983-139395319 | 337  | 139395003 | 139395299 | chr9:139395003-139395299 | 297  | refseq NOTCH1 isoforme1 :exon31 NM_017617                | 100,00 |
| NOTCH1 | exon30 chr9       | 139396179 | 139396385 | chr9:139396179-139396385 | 207  | 139396199 | 139396365 | chr9:139396199-139396365 | 167  | refseq NOTCH1 isoforme1 :exon30 NM_017617                | 100,00 |
| NOTCH1 | exon29 chr9       | 139396432 | 139396650 | chr9:139396432-139396650 | 129  | 139396452 | 139396640 | chr9:139396452-139396640 | 89   | refseq NOTCH1 isoforme1 :exon29 NM_017617                | 100,00 |
| NOTCH1 | exon28 chr9       | 139396703 | 139396960 | chr9:139396703-139396960 | 258  | 139396723 | 139396940 | chr9:139396723-139396940 | 218  | refseq NOTCH1 isoforme1 :exon28 NM_017617                | 100,00 |
| NOTCH1 | exon27 chr9       | 139397613 | 139397802 | chr9:139397613-139397802 | 190  | 139397633 | 139397782 | chr9:139397633-139397782 | 150  | refseq NOTCH1 isoforme1 :exon27 NM_017617                | 100,00 |
| NOTCH1 | exon26 chr9       | 139399104 | 139399576 | chr9:139399104-139399576 | 473  | 139399124 | 139399556 | chr9:139399124-139399556 | 433  | refseq NOTCH1 isoforme1 :exon26 NM_017617                | 100,00 |
| NOTCH1 | exon25 chr9       | 139399741 | 139400353 | chr9:139399741-139400353 | 613  | 139399761 | 139400333 | chr9:139399761-139400333 | 573  | refseq NOTCH1 isoforme1 :exon25 NM_017617                | 100,00 |
| NOTCH1 | exon24 chr9       | 139400958 | 139401111 | chr9:139400958-139401111 | 154  | 139400978 | 139401091 | chr9:139400978-139401091 | 114  | refseq NOTCH1 isoforme1 :exon24 NM_017617                | 100,00 |
| NOTCH1 | exon23 chr9       | 139401147 | 139401445 | chr9:139401147-139401445 | 299  | 139401167 | 139401425 | chr9:139401167-139401425 | 259  | refseq NOTCH1 isoforme1 :exon23 NM_017617                | 100,00 |
| NOTCH1 | exon22 chr9       | 139401736 | 139401909 | chr9:139401736-139401909 | 174  | 139401756 | 139401889 | chr9:139401756-139401889 | 134  | refseq NOTCH1 isoforme1 :exon22 NM_017617                | 100,00 |
| NOTCH1 | exon21 chr9       | 139402386 | 139402611 | chr9:139402386-139402611 | 226  | 139402406 | 139402591 | chr9:139402406-139402591 | 186  | refseq NOTCH1 isoforme1 :exon21 NM_017617                | 100,00 |
| NOTCH1 | exon20 chr9       | 139402663 | 139402857 | chr9:139402663-139402857 | 195  | 139402683 | 139402837 | chr9:139402683-139402837 | 155  | refseq NOTCH1 isoforme1 :exon20 NM_017617                | 100,00 |
| NOTCH1 | exon19 chr9       | 139403301 | 139403543 | chr9:139403301-139403543 | 243  | 139403321 | 139403523 | chr9:139403321-139403523 | 203  | refseq NOTCH1 isoforme1 :exon19 NM_017617                | 100,00 |
| NOTCH1 | exon18 chr9       | 139404164 | 139404433 | chr9:139404164-139404433 | 270  | 139404184 | 139404413 | chr9:139404184-139404413 | 230  | refseq NOTCH1 isoforme1 :exon18 NM_017617                | 100,00 |
| NOTCH1 | exon17 chr9       | 139405084 | 139405277 | chr9:139405084-139405277 | 194  | 139405104 | 139405257 | chr9:139405104-139405257 | 154  | refseq NOTCH1 isoforme1 :exon17 NM_017617                | 100,00 |
| NOTCH1 | exon16 chr9       | 139405583 | 139405743 | chr9:139405583-139405743 | 161  | 139405603 | 139405723 | chr9:139405603-139405723 | 121  | refseq NOTCH1 isoforme1 :exon16 NM_017617                | 100,00 |
| NOTCH1 | exon15 chr9       | 139407452 | 139407606 | chr9:139407452-139407606 | 155  | 139407472 | 139407586 | chr9:139407472-139407586 | 115  | refseq NOTCH1 isoforme1 :exon15 NM_017617                | 100,00 |
| NOTCH1 | exon14 chr9       | 139407823 | 139408009 | chr9:139407823-139408009 | 187  | 139407843 | 139407989 | chr9:139407843-139407989 | 147  | refseq NOTCH1 isoforme1 :exon14 NM_017617                | 100,00 |
| NOTCH1 | exon13 chr9       | 139408941 | 139409174 | chr9:139408941-139409174 | 234  | 139408961 | 139409154 | chr9:139408961-139409154 | 194  | refseq NOTCH1 isoforme1 :exon13 NM_017617                | 100,00 |
| NOTCH1 | exon12 chr9       | 139409721 | 139409872 | chr9:139409721-139409872 | 152  | 139409741 | 139409852 | chr9:139409741-139409852 | 112  | refseq NOTCH1 isoforme1 :exon12 NM_017617                | 100,00 |
| NOTCH1 | exon11 chr9       | 139409914 | 139410188 | chr9:139409914-139410188 | 275  | 139409934 | 139410168 | chr9:139409934-139410168 | 235  | refseq NOTCH1 isoforme1 :exon11 NM_017617                | 100,00 |
| NOTCH1 | exon10 chr9       | 139410412 | 139410566 | chr9:139410412-139410566 | 155  | 139410432 | 139410546 | chr9:139410432-139410546 | 115  | refseq NOTCH1 isoforme1 :exon10 NM_017617                | 100,00 |
| NOTCH1 | exon9 chr9        | 139411703 | 139411857 | chr9:139411703-139411857 | 155  | 139411723 | 139411837 | chr9:139411723-139411837 | 115  | refseq NOTCH1 isoforme1 :exon9 NM_017617                 | 100,00 |
| NOTCH1 | exon8 chr9        | 139412183 | 139412409 | chr9:139412183-139412409 | 227  | 139412203 | 139412389 | chr9:139412203-139412389 | 187  | refseq NOTCH1 isoforme1 :exon8 NM_017617                 | 100,00 |
| NOTCH1 | exon7 chr9        | 139412568 | 139412764 | chr9:139412568-139412764 | 197  | 139412588 | 139412744 | chr9:139412588-139412744 | 157  | refseq NOTCH1 isoforme1 :exon7 NM_017617                 | 100,00 |
| NOTCH1 | exon6 chr9        | 139413022 | 139413296 | chr9:139413022-139413296 | 275  | 139413042 | 139413276 | chr9:139413042-139413276 | 235  | refseq NOTCH1 isoforme1 :exon6 NM_017617                 | 100,00 |
| NOTCH1 | exon5 chr9        | 139413874 | 139414037 | chr9:139413874-139414037 | 164  | 139413894 | 139414017 | chr9:139413894-139414017 | 124  | refseq NOTCH1 isoforme1 :exon5 NM_017617                 | 100,00 |
| NOTCH1 | exon4 chr9        | 139417281 | 139417660 | chr9:139417281-139417660 | 380  | 139417301 | 139417640 | chr9:139417301-139417640 | 340  | refseq NOTCH1 isoforme1 :exon4 NM_017617                 | 100,00 |
| NOTCH1 | exon3 chr9        | 139418148 | 139418451 | chr9:139418148-139418451 | 304  | 139418168 | 139418431 | chr9:139418168-139418431 | 264  | refseq NOTCH1 isoforme1 :exon3 NM_017617                 | 100,00 |
| NOTCH1 | exon2 chr9        | 139438455 | 139438574 | chr9:139438455-139438574 | 120  | 139438475 | 139438554 | chr9:139438475-139438554 | 80   | refseq NOTCH1 isoforme1 :exon2 NM_017617                 | 100,00 |
| NOTCH1 | exon1 chr9        | 139440157 | 139440258 | chr9:139440157-139440258 | 102  | 139440177 | 139       |                          |      |                                                          |        |

|         |                    |          |          |                         |      |          |          |                         |      |                                                                           |        |
|---------|--------------------|----------|----------|-------------------------|------|----------|----------|-------------------------|------|---------------------------------------------------------------------------|--------|
| PDE8A   | exon8 exon7 chr15  | 85634254 | 85634432 | chr15:85634254-85634432 | 179  | 85634274 | 85634412 | chr15:85634274-85634412 | 139  | refseq PDE8A( isoforme1 isoforme3):NM_002605, NM_001243137                | 100,00 |
| PDE8A   | exon9 exon8 chr15  | 85641158 | 85641287 | chr15:85641158-85641287 | 130  | 85641178 | 85641267 | chr15:85641178-85641267 | 90   | refseq PDE8A( isoforme1 isoforme2 i:NM_002605, NM_173454, NM_00124:100,00 |        |
| PDE8A   | exon10 exon9 chr15 | 85643225 | 85643317 | chr15:85643225-85643317 | 93   | 85643245 | 85643297 | chr15:85643245-85643297 | 53   | refseq PDE8A( isoforme1 isoforme2 i:NM_002605, NM_173454, NM_00124:100,00 |        |
| PDE8A   | exon11 exon1 chr15 | 85643366 | 85643449 | chr15:85643366-85643449 | 84   | 85643386 | 85643429 | chr15:85643386-85643429 | 44   | refseq PDE8A( isoforme1 isoforme2 i:NM_002605, NM_173454, NM_00124:100,00 |        |
| PDE8A   | exon12 exon1 chr15 | 85652263 | 85652381 | chr15:85652263-85652381 | 119  | 85652283 | 85652361 | chr15:85652283-85652361 | 79   | refseq PDE8A( isoforme1 isoforme2 i:NM_002605, NM_173454, NM_00124:100,00 |        |
| PDE8A   | exon13 exon1 chr15 | 85656587 | 85656698 | chr15:85656587-85656698 | 112  | 85656607 | 85656678 | chr15:85656607-85656678 | 72   | refseq PDE8A( isoforme1 isoforme2 i:NM_002605, NM_173454, NM_00124:100,00 |        |
| PDE8A   | exon14 exon1 chr15 | 85657083 | 85657288 | chr15:85657083-85657288 | 206  | 85657103 | 85657268 | chr15:85657103-85657268 | 166  | refseq PDE8A( isoforme1 isoforme2 i:NM_002605, NM_173454, NM_00124:100,00 |        |
| PDE8A   | exon15 exon1 chr15 | 85658649 | 85658738 | chr15:85658649-85658738 | 90   | 85658669 | 85658718 | chr15:85658669-85658718 | 50   | refseq PDE8A( isoforme1 isoforme2 i:NM_002605, NM_173454, NM_00124:100,00 |        |
| PDE8A   | exon16 exon1 chr15 | 85659194 | 85659370 | chr15:85659194-85659370 | 177  | 85659214 | 85659350 | chr15:85659214-85659350 | 137  | refseq PDE8A( isoforme1 isoforme2 i:NM_002605, NM_173454, NM_00124:100,00 |        |
| PDE8A   | exon17 exon1 chr15 | 85660851 | 85661090 | chr15:85660851-85661090 | 240  | 85660871 | 85661070 | chr15:85660871-85661070 | 200  | refseq PDE8A( isoforme1 isoforme2 i:NM_002605, NM_173454, NM_00124:100,00 |        |
| PDE8A   | exon18 exon1 chr15 | 85664007 | 85664265 | chr15:85664007-85664265 | 259  | 85664027 | 85664245 | chr15:85664027-85664245 | 219  | refseq PDE8A( isoforme1 isoforme2 i:NM_002605, NM_173454, NM_00124:100,00 |        |
| PDE8A   | exon19 exon1 chr15 | 85666271 | 85666444 | chr15:85666271-85666444 | 174  | 85666291 | 85666424 | chr15:85666291-85666424 | 134  | refseq PDE8A( isoforme1 isoforme2 i:NM_002605, NM_173454, NM_00124:100,00 |        |
| PDE8A   | exon20 exon1 chr15 | 85669617 | 85669625 | chr15:85669617-85669625 | 209  | 85669437 | 85669605 | chr15:85669437-85669605 | 169  | refseq PDE8A( isoforme1 isoforme2 i:NM_002605, NM_173454, NM_00124:100,00 |        |
| PDE8A   | exon21 exon2 chr15 | 85679744 | 85679914 | chr15:85679744-85679914 | 171  | 85679764 | 85679894 | chr15:85679764-85679894 | 131  | refseq PDE8A( isoforme1 isoforme2 i:NM_002605, NM_173454, NM_00124:100,00 |        |
| PDE8A   | exon22 exon2 chr15 | 85681007 | 85681154 | chr15:85681007-85681154 | 148  | 85681027 | 85681134 | chr15:85681027-85681134 | 108  | refseq PDE8A( isoforme1 isoforme2 i:NM_002605, NM_173454, NM_00124:100,00 |        |
| PIK3C2A | exon32 chr11       | 17111264 | 17111487 | chr11:17111264-17111487 | 224  | 17111284 | 17111467 | chr11:17111284-17111467 | 184  | refseq PIK3C2A( isoforme1):exon32 NM_002645                               | 100,00 |
| PIK3C2A | exon31 chr11       | 17112860 | 17113026 | chr11:17112860-17113026 | 167  | 17112880 | 17113067 | chr11:17112880-17113067 | 127  | refseq PIK3C2A( isoforme1):exon31 NM_002645                               | 100,00 |
| PIK3C2A | exon30 chr11       | 17113073 | 17113223 | chr11:17113073-17113223 | 151  | 17113093 | 17113203 | chr11:17113093-17113203 | 111  | refseq PIK3C2A( isoforme1):exon30 NM_002645                               | 100,00 |
| PIK3C2A | exon29 chr11       | 17113522 | 17113635 | chr11:17113522-17113635 | 114  | 17113542 | 17113615 | chr11:17113542-17113615 | 74   | refseq PIK3C2A( isoforme1):exon29 NM_002645                               | 100,00 |
| PIK3C2A | exon28 chr11       | 17113685 | 17113843 | chr11:17113685-17113843 | 159  | 17113707 | 17113823 | chr11:17113707-17113823 | 119  | refseq PIK3C2A( isoforme1):exon28 NM_002645                               | 100,00 |
| PIK3C2A | exon27 chr11       | 17115787 | 17115952 | chr11:17115787-17115952 | 166  | 17115807 | 17115932 | chr11:17115807-17115932 | 126  | refseq PIK3C2A( isoforme1):exon27 NM_002645                               | 100,00 |
| PIK3C2A | exon26 chr11       | 17118583 | 17118831 | chr11:17118583-17118831 | 249  | 17118603 | 17118811 | chr11:17118603-17118811 | 209  | refseq PIK3C2A( isoforme1):exon26 NM_002645                               | 100,00 |
| PIK3C2A | exon25 chr11       | 17121386 | 17121536 | chr11:17121386-17121536 | 151  | 17121406 | 17121516 | chr11:17121406-17121516 | 111  | refseq PIK3C2A( isoforme1):exon25 NM_002645                               | 100,00 |
| PIK3C2A | exon24 chr11       | 17122804 | 17123001 | chr11:17122804-17123001 | 198  | 17122824 | 17122981 | chr11:17122824-17122981 | 158  | refseq PIK3C2A( isoforme1):exon24 NM_002645                               | 100,00 |
| PIK3C2A | exon23 chr11       | 17124188 | 17124398 | chr11:17124188-17124398 | 211  | 17124208 | 17124378 | chr11:17124208-17124378 | 171  | refseq PIK3C2A( isoforme1):exon23 NM_002645                               | 100,00 |
| PIK3C2A | exon22 chr11       | 17126695 | 17126872 | chr11:17126695-17126872 | 178  | 17126715 | 17126852 | chr11:17126715-17126852 | 138  | refseq PIK3C2A( isoforme1):exon22 NM_002645                               | 100,00 |
| PIK3C2A | exon21 chr11       | 17131958 | 17132128 | chr11:17131958-17132128 | 171  | 17131978 | 17132108 | chr11:17131978-17132108 | 131  | refseq PIK3C2A( isoforme1):exon21 NM_002645                               | 100,00 |
| PIK3C2A | exon20 chr11       | 17134100 | 17134233 | chr11:17134100-17134233 | 134  | 17134120 | 17134213 | chr11:17134120-17134213 | 94   | refseq PIK3C2A( isoforme1):exon20 NM_002645                               | 100,00 |
| PIK3C2A | exon19 chr11       | 17135887 | 17136032 | chr11:17135887-17136032 | 146  | 17135907 | 17136012 | chr11:17135907-17136012 | 106  | refseq PIK3C2A( isoforme1):exon19 NM_002645                               | 100,00 |
| PIK3C2A | exon18 chr11       | 17139017 | 17139238 | chr11:17139017-17139238 | 222  | 17139037 | 17139218 | chr11:17139037-17139218 | 182  | refseq PIK3C2A( isoforme1):exon18 NM_002645                               | 100,00 |
| PIK3C2A | exon17 chr11       | 17140171 | 17140306 | chr11:17140171-17140306 | 136  | 17140191 | 17140286 | chr11:17140191-17140286 | 96   | refseq PIK3C2A( isoforme1):exon17 NM_002645                               | 100,00 |
| PIK3C2A | exon16 chr11       | 17140746 | 17140880 | chr11:17140746-17140880 | 135  | 17140766 | 17140860 | chr11:17140766-17140860 | 95   | refseq PIK3C2A( isoforme1):exon16 NM_002645                               | 100,00 |
| PIK3C2A | exon15 chr11       | 17141312 | 17141541 | chr11:17141312-17141541 | 230  | 17141332 | 17141521 | chr11:17141332-17141521 | 190  | refseq PIK3C2A( isoforme1):exon15 NM_002645                               | 100,00 |
| PIK3C2A | exon14 chr11       | 17143714 | 17143900 | chr11:17143714-17143900 | 187  | 17143734 | 17143880 | chr11:17143734-17143880 | 147  | refseq PIK3C2A( isoforme1):exon14 NM_002645                               | 100,00 |
| PIK3C2A | exon13 chr11       | 17144228 | 17144380 | chr11:17144228-17144380 | 153  | 17144248 | 17144360 | chr11:17144248-17144360 | 113  | refseq PIK3C2A( isoforme1):exon13 NM_002645                               | 100,00 |
| PIK3C2A | exon12 chr11       | 17150826 | 17151034 | chr11:17150826-17151034 | 209  | 17150846 | 17151014 | chr11:17150846-17151014 | 169  | refseq PIK3C2A( isoforme1):exon12 NM_002645                               | 100,00 |
| PIK3C2A | exon11 chr11       | 17153442 | 17153605 | chr11:17153442-17153605 | 164  | 17153462 | 17153585 | chr11:17153462-17153585 | 124  | refseq PIK3C2A( isoforme1):exon11 NM_002645                               | 100,00 |
| PIK3C2A | exon10 chr11       | 17156345 | 17156596 | chr11:17156345-17156596 | 252  | 17156365 | 17156576 | chr11:17156365-17156576 | 212  | refseq PIK3C2A( isoforme1):exon10 NM_002645                               | 100,00 |
| PIK3C2A | exon9 chr11        | 17156637 | 17156726 | chr11:17156637-17156726 | 90   | 17156657 | 17156706 | chr11:17156657-17156706 | 50   | refseq PIK3C2A( isoforme1):exon9 NM_002645                                | 100,00 |
| PIK3C2A | exon8 chr11        | 17158008 | 17158192 | chr11:17158008-17158192 | 185  | 17158028 | 17158172 | chr11:17158028-17158172 | 145  | refseq PIK3C2A( isoforme1):exon8 NM_002645                                | 100,00 |
| PIK3C2A | exon7 chr11        | 17167194 | 17167298 | chr11:17167194-17167298 | 105  | 17167214 | 17167278 | chr11:17167214-17167278 | 65   | refseq PIK3C2A( isoforme1):exon7 NM_002645                                | 100,00 |
| PIK3C2A | exon6 chr11        | 17167389 | 17167509 | chr11:17167389-17167509 | 121  | 17167409 | 17167489 | chr11:17167409-17167489 | 81   | refseq PIK3C2A( isoforme1):exon6 NM_002645                                | 100,00 |
| PIK3C2A | exon5 chr11        | 17169043 | 17169195 | chr11:17169043-17169195 | 153  | 17169063 | 17169175 | chr11:17169063-17169175 | 113  | refseq PIK3C2A( isoforme1):exon5 NM_002645                                | 100,00 |
| PIK3C2A | exon4 chr11        | 17170193 | 17170354 | chr11:17170193-17170354 | 162  | 17170213 | 17170334 | chr11:17170213-17170334 | 122  | refseq PIK3C2A( isoforme1):exon4 NM_002645                                | 100,00 |
| PIK3C2A | exon3 chr11        | 17172024 | 17172222 | chr11:17172024-17172222 | 199  | 17172044 | 17172202 | chr11:17172044-17172202 | 159  | refseq PIK3C2A( isoforme1):exon3 NM_002645                                | 100,00 |
| PIK3C2A | exon2 chr11        | 17177052 | 17177196 | chr11:17177052-17177196 | 145  | 17177072 | 17177176 | chr11:17177072-17177176 | 105  | refseq PIK3C2A( isoforme1):exon2 NM_002645                                | 100,00 |
| PK2     | exon1 chr11        | 17190203 | 17191308 | chr11:17190203-17191308 | 1106 | 17190223 | 17191288 | chr11:17190223-17191288 | 1066 | refseq PK2( isoforme1 isoforme2):NM_001252226, NM_006622                  | 100,00 |
| PK2     | exon15 exon1 chr5  | 57750389 | 57750621 | chr5:57750389-57750621  | 233  | 57750409 | 57750509 | chr5:57750409-57750509  | 193  | refseq PK2( isoforme1 isoforme2):NM_001252226, NM_006622                  | 100,00 |
| PK2     | exon14 exon1 chr5  | 57750717 | 57750868 | chr5:57750717-57750868  | 152  | 57750737 | 57750848 | chr5:57750737-57750848  | 112  | refseq PK2( isoforme1 isoforme2):NM_001252226, NM_006622                  | 100,00 |
| PK2     | exon13 exon1 chr5  | 57751091 | 57751261 | chr5:57751091-57751261  | 171  | 57751111 | 57751241 | chr5:57751111-57751241  | 131  | refseq PK2( isoforme1 isoforme2):NM_001252226, NM_006622                  | 100,00 |
| PK2     | exon12 exon1 chr5  | 57751345 | 57751626 | chr5:57751345-57751626  | 282  | 57751365 | 57751606 | chr5:57751365-57751606  | 242  | refseq PK2( isoforme1 isoforme2):NM_001252226, NM_006622                  | 100,00 |
| PK2     | exon11 exon1 chr5  | 57751832 | 57752002 | chr5:57751832-57752002  | 171  | 57751852 | 57751982 | chr5:57751852-57751982  | 131  | refseq PK2( isoforme1 isoforme2):NM_001252226, NM_006622                  | 100,00 |
| PK2     | exon10 exon1 chr5  | 57752298 | 57752436 | chr5:57752298-57752436  | 139  | 57752318 | 57752416 | chr5:57752318-57752416  | 99   | refseq PK2( isoforme1 isoforme2):NM_001252226, NM_006622                  | 100,00 |
| PK2     | exon9 exon8 chr5   | 57752751 | 57752939 | chr5:57752751-57752939  | 189  | 57752771 | 57752919 | chr5:57752771-57752919  | 149  | refseq PK2( isoforme1 isoforme2):NM_001252226, NM_006622                  | 100,00 |
| PK2     | exon8 exon7 chr5   | 57752987 | 57753226 | chr5:57752987-57753226  | 240  | 57753007 | 57753206 | chr5:57753007-57753206  | 200  | refseq PK2( isoforme1 isoforme2):NM_001252226, NM_006622                  | 100,00 |
| PK2     | exon7 exon6 chr5   | 57753294 | 57753430 | chr5:57753294-57753430  | 137  | 57753314 | 57753410 | chr5:57753314-57753410  | 97   | refseq PK2( isoforme1 isoforme2):NM_001252226, NM_006622                  | 100,00 |
| PK2     | exon6 exon5 chr5   | 57753890 | 57754018 | chr5:57753890-57754018  | 129  | 57753910 | 57753998 | chr5:57753910-57753998  | 89   | refseq PK2( isoforme1 isoforme2):NM_001252226, NM_006622                  | 100,00 |
| PK2     | exon5 exon4 chr5   | 57754205 | 57754375 | chr5:57754205-57754375  | 171  | 57754225 | 57754355 | chr5:57754225-57754355  | 131  | refseq PK2( isoforme1 isoforme2):NM_001252226, NM_006622                  | 100,00 |
| PK2     | exon4 exon3 chr5   | 57754531 | 57754688 | chr5:57754531-57754688  | 158  | 57754551 | 57754668 | chr5:57754551-57754668  | 118  | refseq PK2( isoforme1 isoforme2):NM_001252226, NM_006622                  | 100,00 |
| PK2     | exon3 exon2 chr5   | 57754791 | 57754939 | chr5:57754791-57754939  | 149  | 57754811 | 57754919 | chr5:57754811-57754919  | 109  | refseq PK2( isoforme1 isoforme2):NM_001252226, NM_006622                  | 100,00 |
| PK2     | exon1 chr5         | 57755496 | 57755806 | chr5:57755496-57755806  | 311  | 57755516 | 57755786 | chr5:57755516-57755786  | 271  | refseq PK2( isoforme1 isoforme2):NM_001252226, NM_006622                  | 100,00 |
| POLD2   | exon11 exon1 chr7  | 44154363 | 44154564 | chr7:44154363-44154564  | 202  | 44154383 | 44154544 | chr7:44154383-44154544  | 162  | refseq POLD2( isoforme1 isoforme2):NM_006230, NM_001127218, NM_00:100,00  |        |
| POLD2   | exon10 exon9 chr7  | 44154873 | 44155015 | chr7:44154873-44155015  | 143  | 44154893 | 44154995 | chr7:44154893-44154995  | 103  | refseq POLD2( isoforme1 isoforme2):NM_006230, NM_001127218, NM_00:100,00  |        |
| POLD2   | exon9 exon8 chr7   | 44155344 | 44155512 | chr7:44155344-44155512  | 169  | 44155364 | 44155492 | chr7:44155364-44155492  | 129  | refseq POLD2( isoforme1 isoforme2):NM_006230, NM_001127218, NM_00:100,00  |        |
| POLD2   | ex                 |          |          |                         |      |          |          |                         |      |                                                                           |        |



|          |        |       |           |           |                           |     |           |           |                           |     |                                                                                           |        |
|----------|--------|-------|-----------|-----------|---------------------------|-----|-----------|-----------|---------------------------|-----|-------------------------------------------------------------------------------------------|--------|
| TBC1D10B | exon3  | chr16 | 30376405  | 30376553  | chr16:30376405-30376553   | 149 | 30376425  | 30376533  | chr16:30376425-30376533   | 109 | refseq TBC1D10B isoforme1 exon3 NM_015527                                                 | 100,00 |
| TBC1D10B | exon2  | chr16 | 30376795  | 30376935  | chr16:30376795-30376935   | 141 | 30376815  | 30376915  | chr16:30376815-30376915   | 101 | refseq TBC1D10B isoforme1 exon2 NM_015527                                                 | 100,00 |
| TBC1D10B | exon1  | chr16 | 30380528  | 30381524  | chr16:30380528-30381524   | 997 | 30380548  | 30381504  | chr16:30380548-30381504   | 957 | refseq TBC1D10B isoforme1 exon1 NM_015527                                                 | 100,00 |
| TBC1D19  | exon1  | chr4  | 26585795  | 26585934  | chr4:26585795-26585934    | 140 | 26585815  | 26585914  | chr4:26585815-26585914    | 100 | refseq TBC1D19 isoforme1 isoforme NM_001292054, NM_018317                                 | 100,00 |
| TBC1D19  | exon2  | chr4  | 26614770  | 26614883  | chr4:26614770-26614883    | 114 | 26614790  | 26614863  | chr4:26614790-26614863    | 74  | refseq TBC1D19 isoforme2 exon2 eNM_018317                                                 | 100,00 |
| TBC1D19  | exon3  | chr4  | 26616009  | 26616095  | chr4:26616009-26616095    | 87  | 26616029  | 26616075  | chr4:26616029-26616075    | 47  | refseq TBC1D19 isoforme2 exon3 eNM_018317                                                 | 100,00 |
| TBC1D19  | exon4  | chr4  | 26622214  | 26622330  | chr4:26622214-26622330    | 117 | 26622234  | 26622310  | chr4:26622234-26622310    | 77  | refseq TBC1D19 isoforme2 exon4 eNM_018317                                                 | 100,00 |
| TBC1D19  | exon2  | chr4  | 26638812  | 26638927  | chr4:26638812-26638927    | 116 | 26638832  | 26638907  | chr4:26638832-26638907    | 76  | refseq TBC1D19 isoforme1 isoforme NM_001292054, NM_018317                                 | 100,00 |
| TBC1D19  | exon3  | chr4  | 26640372  | 26640476  | chr4:26640372-26640476    | 105 | 26640392  | 26640456  | chr4:26640392-26640456    | 65  | refseq TBC1D19 isoforme1 isoforme NM_001292054, NM_018317                                 | 100,00 |
| TBC1D19  | exon4  | chr4  | 26641742  | 26641829  | chr4:26641742-26641829    | 88  | 26641762  | 26641809  | chr4:26641762-26641809    | 48  | refseq TBC1D19 isoforme1 isoforme NM_001292054, NM_018317                                 | 100,00 |
| TBC1D19  | exon5  | chr4  | 26661198  | 26661349  | chr4:26661198-26661349    | 152 | 26661218  | 26661329  | chr4:26661218-26661329    | 112 | refseq TBC1D19 isoforme1 isoforme NM_001292054, NM_018317                                 | 100,00 |
| TBC1D19  | exon6  | chr4  | 26667934  | 26668047  | chr4:26667934-26668047    | 114 | 26667954  | 26668027  | chr4:26667954-26668027    | 74  | refseq TBC1D19 isoforme1 isoforme NM_001292054, NM_018317                                 | 100,00 |
| TBC1D19  | exon7  | chr4  | 26673750  | 26673829  | chr4:26673750-26673829    | 80  | 26673770  | 26673809  | chr4:26673770-26673809    | 40  | refseq TBC1D19 isoforme1 isoforme NM_001292054, NM_018317                                 | 100,00 |
| TBC1D19  | exon8  | chr4  | 26675377  | 26675530  | chr4:26675377-26675530    | 154 | 26675397  | 26675510  | chr4:26675397-26675510    | 114 | refseq TBC1D19 isoforme1 isoforme NM_001292054, NM_018317                                 | 100,00 |
| TBC1D19  | exon9  | chr4  | 26685276  | 26685391  | chr4:26685276-26685391    | 116 | 26685296  | 26685371  | chr4:26685296-26685371    | 76  | refseq TBC1D19 isoforme1 isoforme NM_001292054, NM_018317                                 | 100,00 |
| TBC1D19  | exon10 | chr4  | 26689946  | 26690049  | chr4:26689946-26690049    | 104 | 26689966  | 26690029  | chr4:26689966-26690029    | 64  | refseq TBC1D19 isoforme1 isoforme NM_001292054, NM_018317                                 | 100,00 |
| TBC1D19  | exon11 | chr4  | 26719534  | 26719659  | chr4:26719534-26719659    | 126 | 26719554  | 26719639  | chr4:26719554-26719639    | 86  | refseq TBC1D19 isoforme1 isoforme NM_001292054, NM_018317                                 | 100,00 |
| TBC1D19  | exon12 | chr4  | 26721682  | 26721767  | chr4:26721682-26721767    | 86  | 26721702  | 26721747  | chr4:26721702-26721747    | 46  | refseq TBC1D19 isoforme1 isoforme NM_001292054, NM_018317                                 | 100,00 |
| TBC1D19  | exon13 | chr4  | 26737056  | 26737129  | chr4:26737056-26737129    | 74  | 26737076  | 26737109  | chr4:26737076-26737109    | 34  | refseq TBC1D19 isoforme1 isoforme NM_001292054, NM_018317                                 | 100,00 |
| TBC1D19  | exon14 | chr4  | 26741465  | 26741615  | chr4:26741465-26741615    | 151 | 26741485  | 26741595  | chr4:26741485-26741595    | 111 | refseq TBC1D19 isoforme1 isoforme NM_001292054, NM_018317                                 | 100,00 |
| TBC1D19  | exon15 | chr4  | 26744109  | 26744241  | chr4:26744109-26744241    | 133 | 26744129  | 26744221  | chr4:26744129-26744221    | 93  | refseq TBC1D19 isoforme1 isoforme NM_001292054, NM_018317                                 | 100,00 |
| TBC1D19  | exon16 | chr4  | 26750012  | 26750168  | chr4:26750012-26750168    | 157 | 26750032  | 26750148  | chr4:26750032-26750148    | 117 | refseq TBC1D19 isoforme1 isoforme NM_001292054, NM_018317                                 | 100,00 |
| TBC1D19  | exon17 | chr4  | 26755421  | 26755532  | chr4:26755421-26755532    | 112 | 26755441  | 26755512  | chr4:26755441-26755512    | 72  | refseq TBC1D19 isoforme1 isoforme NM_001292054, NM_018317                                 | 100,00 |
| TBC1D19  | exon18 | chr4  | 26756474  | 26756589  | chr4:26756474-26756589    | 116 | 26756494  | 26756569  | chr4:26756494-26756569    | 76  | refseq TBC1D19 isoforme1 isoforme NM_001292054, NM_018317                                 | 100,00 |
| TBC1D2   | exon13 | chr9  | 100961642 | 100961890 | chr9:100961642-100961890  | 249 | 100961662 | 100961870 | chr9:100961662-100961870  | 209 | refseq TBC1D2 isoforme1 isoforme2 NM_001267571, NM_018421, NM_001267572                   | 100,00 |
| TBC1D2   | exon12 | chr9  | 100962514 | 100962676 | chr9:100962514-100962676  | 163 | 100962534 | 100962656 | chr9:100962534-100962656  | 123 | refseq TBC1D2 isoforme1 isoforme4 NM_001267571, NM_001267572                              | 100,00 |
| TBC1D2   | exon11 | chr9  | 100963740 | 100963966 | chr9:100963740-100963966  | 227 | 100963760 | 100963946 | chr9:100963760-100963946  | 187 | refseq TBC1D2 isoforme1 isoforme2 NM_001267571, NM_018421, NM_001267572                   | 100,00 |
| TBC1D2   | exon10 | chr9  | 100965549 | 100965710 | chr9:100965549-100965710  | 162 | 100965569 | 100965690 | chr9:100965569-100965690  | 122 | refseq TBC1D2 isoforme1 isoforme2 NM_001267571, NM_018421, NM_001267572                   | 100,00 |
| TBC1D2   | exon9  | chr9  | 100970929 | 100971446 | chr9:100970929-100971446  | 518 | 100970949 | 100971426 | chr9:100970949-100971426  | 478 | refseq TBC1D2 isoforme1 isoforme2 NM_001267571, NM_018421, NM_001267572                   | 100,00 |
| TBC1D2   | exon8  | chr9  | 100972917 | 100973145 | chr9:100972917-100973145  | 229 | 100972937 | 100973125 | chr9:100972937-100973125  | 189 | refseq TBC1D2 isoforme1 isoforme2 NM_001267571, NM_018421, NM_001267572                   | 100,00 |
| TBC1D2   | exon7  | chr9  | 100975369 | 100975520 | chr9:100975369-100975520  | 152 | 100975389 | 100975500 | chr9:100975389-100975500  | 112 | refseq TBC1D2 isoforme1 isoforme2 NM_001267571, NM_018421                                 | 100,00 |
| TBC1D2   | exon6  | chr9  | 100983094 | 100983530 | chr9:100983094-100983530  | 437 | 100983114 | 100983510 | chr9:100983114-100983510  | 397 | refseq TBC1D2 isoforme1 isoforme2 NM_001267571, NM_018421                                 | 100,00 |
| TBC1D2   | exon5  | chr9  | 100991213 | 100991450 | chr9:100991213-100991450  | 238 | 100991233 | 100991430 | chr9:100991233-100991430  | 198 | refseq TBC1D2 isoforme1 isoforme2 NM_001267571, NM_018421                                 | 100,00 |
| TBC1D2   | exon4  | chr9  | 100995677 | 100995851 | chr9:100995677-100995851  | 175 | 100995697 | 100995831 | chr9:100995697-100995831  | 135 | refseq TBC1D2 isoforme1 isoforme2 NM_001267571, NM_018421                                 | 100,00 |
| TBC1D2   | exon3  | chr9  | 101006255 | 101006431 | chr9:101006255-101006431  | 177 | 101006275 | 101006411 | chr9:101006275-101006411  | 137 | refseq TBC1D2 isoforme1 isoforme2 NM_001267571, NM_018421                                 | 100,00 |
| TBC1D2   | exon2  | chr9  | 101014046 | 101014228 | chr9:101014046-101014228  | 183 | 101014066 | 101014208 | chr9:101014066-101014208  | 143 | refseq TBC1D2 isoforme1 isoforme2 NM_001267571, NM_018421                                 | 100,00 |
| TBC1D2   | exon1  | chr9  | 101017434 | 101017843 | chr9:101017434-101017843  | 410 | 101017454 | 101017823 | chr9:101017454-101017823  | 370 | refseq TBC1D2 isoforme1 isoforme2 NM_001267571, NM_018421                                 | 100,00 |
| TBK1     | exon1  | chr12 | 64849630  | 64849757  | chr12:64849630-64849757   | 128 | 64849650  | 64849737  | chr12:64849650-64849737   | 88  | refseq TBK1 isoforme1 exon1 exte NM_013254                                                | 100,00 |
| TBK1     | exon2  | chr12 | 64853948  | 64854129  | chr12:64853948-64854129   | 182 | 64853968  | 64854109  | chr12:64853968-64854109   | 142 | refseq TBK1 isoforme1 exon2 exte NM_013254                                                | 100,00 |
| TBK1     | exon3  | chr12 | 64858093  | 64858263  | chr12:64858093-64858263   | 171 | 64858113  | 64858243  | chr12:64858113-64858243   | 131 | refseq TBK1 isoforme1 exon3 exte NM_013254                                                | 100,00 |
| TBK1     | exon4  | chr12 | 64860660  | 64860882  | chr12:64860660-64860882   | 223 | 64860680  | 64860862  | chr12:64860680-64860862   | 183 | refseq TBK1 isoforme1 exon4 exte NM_013254                                                | 100,00 |
| TBK1     | exon5  | chr12 | 64867989  | 64868190  | chr12:64867989-64868190   | 202 | 64868009  | 64868170  | chr12:64868009-64868170   | 162 | refseq TBK1 isoforme1 exon5 exte NM_013254                                                | 100,00 |
| TBK1     | exon6  | chr12 | 64873771  | 64873922  | chr12:64873771-64873922   | 152 | 64873791  | 64873902  | chr12:64873791-64873902   | 112 | refseq TBK1 isoforme1 exon6 exte NM_013254                                                | 100,00 |
| TBK1     | exon7  | chr12 | 64875601  | 64875821  | chr12:64875601-64875821   | 221 | 64875621  | 64875801  | chr12:64875621-64875801   | 181 | refseq TBK1 isoforme1 exon7 exte NM_013254                                                | 100,00 |
| TBK1     | exon8  | chr12 | 64878062  | 64878299  | chr12:64878062-64878299   | 238 | 64878082  | 64878279  | chr12:64878082-64878279   | 198 | refseq TBK1 isoforme1 exon8 exte NM_013254                                                | 100,00 |
| TBK1     | exon9  | chr12 | 64879214  | 64879313  | chr12:64879214-64879313   | 100 | 64879234  | 64879293  | chr12:64879234-64879293   | 60  | refseq TBK1 isoforme1 exon9 exte NM_013254                                                | 100,00 |
| TBK1     | exon10 | chr12 | 64879685  | 64879817  | chr12:64879685-64879817   | 133 | 64879705  | 64879797  | chr12:64879705-64879797   | 93  | refseq TBK1 isoforme1 exon10 exte NM_013254                                               | 100,00 |
| TBK1     | exon11 | chr12 | 64882246  | 64882388  | chr12:64882246-64882388   | 143 | 64882266  | 64882368  | chr12:64882266-64882368   | 103 | refseq TBK1 isoforme1 exon11 exte NM_013254                                               | 100,00 |
| TBK1     | exon12 | chr12 | 64883800  | 64883919  | chr12:64883800-64883919   | 120 | 64883820  | 64883899  | chr12:64883820-64883899   | 80  | refseq TBK1 isoforme1 exon12 exte NM_013254                                               | 100,00 |
| TBK1     | exon13 | chr12 | 64889242  | 64889404  | chr12:64889242-64889404   | 163 | 64889262  | 64889384  | chr12:64889262-64889384   | 123 | refseq TBK1 isoforme1 exon13 exte NM_013254                                               | 100,00 |
| TBK1     | exon14 | chr12 | 64889458  | 64889575  | chr12:64889458-64889575   | 118 | 64889478  | 64889555  | chr12:64889478-64889555   | 78  | refseq TBK1 isoforme1 exon14 exte NM_013254                                               | 100,00 |
| TBK1     | exon15 | chr12 | 64890126  | 64890206  | chr12:64890126-64890206   | 81  | 64890146  | 64890186  | chr12:64890146-64890186   | 41  | refseq TBK1 isoforme1 exon15 exte NM_013254                                               | 100,00 |
| TBK1     | exon16 | chr12 | 64890708  | 64890850  | chr12:64890708-64890850   | 143 | 64890728  | 64890830  | chr12:64890728-64890830   | 103 | refseq TBK1 isoforme1 exon16 exte NM_013254                                               | 100,00 |
| TBK1     | exon17 | chr12 | 64890922  | 64891059  | chr12:64890922-64891059   | 138 | 64890942  | 64891039  | chr12:64890942-64891039   | 98  | refseq TBK1 isoforme1 exon17 exte NM_013254                                               | 100,00 |
| TBK1     | exon18 | chr12 | 64891407  | 64891554  | chr12:64891407-64891554   | 148 | 64891427  | 64891534  | chr12:64891427-64891534   | 108 | refseq TBK1 isoforme1 exon18 exte NM_013254                                               | 100,00 |
| TBK1     | exon19 | chr12 | 64891727  | 64891839  | chr12:64891727-64891839   | 113 | 64891747  | 64891819  | chr12:64891747-64891819   | 73  | refseq TBK1 isoforme1 exon19 exte NM_013254                                               | 100,00 |
| TBK1     | exon20 | chr12 | 64895089  | 64895181  | chr12:64895089-64895181   | 93  | 64895109  | 64895161  | chr12:64895109-64895161   | 53  | refseq TBK1 isoforme1 exon20 exte NM_013254                                               | 100,00 |
| TCF7L2   | exon1  | chr10 | 114710724 | 114710951 | chr10:114710724-114710951 | 230 | 114710751 | 114710704 | chr10:114710751-114710704 | 190 | refseq TCF7L2 isoforme1 isoforme2 INM_001146286, NM_001198525, NM_001198526, NM_001198527 | 100,00 |
| TCF7L2   | exon2  | chr10 | 114710945 | 114711052 | chr10:114710945-114711052 | 108 | 114710965 | 114711032 | chr10:114710965-114711032 | 68  | refseq TCF7L2 isoforme1 isoforme2 INM_001146286, NM_001198525, NM_001198526, NM_001198527 | 100,00 |
| TCF7L2   | exon3  | chr10 | 114711221 | 114711386 | chr10:114711221-114711386 | 166 | 114711241 | 114711366 | chr10:114711241-114711366 | 126 | refseq TCF7L2 isoforme1 isoforme2 INM_001146286, NM_001198525, NM_001198526, NM_001198527 | 100,00 |
| TCF7L2   | exon4  | chr10 | 114724294 | 114724403 | chr10:114724294-114724403 | 110 | 114724314 | 114724383 | chr10:114724314-114724383 | 70  | refseq TCF7L2 isoforme1 isoforme2 INM_001198531, NM_001146274                             | 100,00 |
| TCF7L2   | exon4  | chr10 | 114799763 | 114799905 | chr10:114799763-114799905 | 143 | 114799783 | 114799885 |                           |     |                                                                                           |        |

|       |                    |          |          |                         |      |          |          |                         |      |                                                                     |        |
|-------|--------------------|----------|----------|-------------------------|------|----------|----------|-------------------------|------|---------------------------------------------------------------------|--------|
| U2AF1 | exon5 exon8 chr21  | 44513191 | 44513379 | chr21:44513191-44513379 | 189  | 44513211 | 44513359 | chr21:44513211-44513359 | 149  | refseq U2AF1( isoforme1 isoforme2 i:NM_001025204, NM_006758, NM_00: | 100,00 |
| U2AF1 | exon4 exon7 chr21  | 44514560 | 44514693 | chr21:44514560-44514693 | 134  | 44514580 | 44514673 | chr21:44514580-44514673 | 94   | refseq U2AF1( isoforme1 isoforme2 i:NM_001025204, NM_006758, NM_00: | 100,00 |
| U2AF1 | exon3 exon6 chr21  | 44514744 | 44514918 | chr21:44514744-44514918 | 175  | 44514764 | 44514898 | chr21:44514764-44514898 | 135  | refseq U2AF1( isoforme1 isoforme2 i:NM_001025204, NM_006758, NM_00: | 100,00 |
| U2AF1 | exon2 exon5 chr21  | 44515527 | 44515666 | chr21:44515527-44515666 | 140  | 44515547 | 44515646 | chr21:44515547-44515646 | 100  | refseq U2AF1( isoforme1 isoforme2 i:NM_001025204, NM_006758, NM_00: | 100,00 |
| U2AF1 | exon4 exon4 chr21  | 44515783 | 44515873 | chr21:44515783-44515873 | 91   | 44515803 | 44515853 | chr21:44515803-44515853 | 51   | refseq U2AF1( isoforme2 isoforme3):NM_006758, NM_001025203          | 100,00 |
| U2AF1 | exon3 chr21        | 44520542 | 44520649 | chr21:44520542-44520649 | 108  | 44520562 | 44520629 | chr21:44520562-44520629 | 68   | refseq U2AF1( isoforme2):exon3 extrNM_006758                        | 100,00 |
| U2AF1 | exon3 chr21        | 44521455 | 44521562 | chr21:44521455-44521562 | 108  | 44521475 | 44521542 | chr21:44521475-44521542 | 68   | refseq U2AF1( isoforme3):exon3 extrNM_001025203                     | 100,00 |
| U2AF1 | exon2 exon2 chr21  | 44524404 | 44524532 | chr21:44524404-44524532 | 129  | 44524424 | 44524512 | chr21:44524424-44524512 | 89   | refseq U2AF1( isoforme2 isoforme3):NM_006758, NM_001025203          | 100,00 |
| USP29 | exon1 chr19        | 57640023 | 57642832 | chr19:57640023-57642832 | 2810 | 57640043 | 57642812 | chr19:57640043-57642812 | 2770 | refseq USP29( isoforme1):exon1 extrNM_020903                        | 100,00 |
| WNK1  | exon1 exon1 chr12  | 862711   | 863510   | chr12:862711-863510     | 800  | 862731   | 863490   | chr12:862731-863490     | 760  | refseq WNK1( isoforme1 isoforme2 i:NM_014823, NM_018979, NM_21365:  | 100,00 |
| WNK1  | exon2 exon2 chr12  | 922787   | 923000   | chr12:922787-923000     | 214  | 922807   | 922980   | chr12:922807-922980     | 174  | refseq WNK1( isoforme1 isoforme2 i:NM_014823, NM_018979, NM_21365:  | 100,00 |
| WNK1  | exon3 exon3 chr12  | 936187   | 936448   | chr12:936187-936448     | 262  | 936207   | 936428   | chr12:936207-936428     | 222  | refseq WNK1( isoforme1 isoforme2 i:NM_014823, NM_018979, NM_21365:  | 100,00 |
| WNK1  | exon4 exon4 chr12  | 939148   | 939346   | chr12:939148-939346     | 199  | 939168   | 939326   | chr12:939168-939326     | 159  | refseq WNK1( isoforme1 isoforme2 i:NM_014823, NM_018979, NM_21365:  | 100,00 |
| WNK1  | exon5 exon5 chr12  | 966306   | 966435   | chr12:966306-966435     | 130  | 966326   | 966415   | chr12:966326-966415     | 90   | refseq WNK1( isoforme1 isoforme2 i:NM_014823, NM_018979, NM_21365:  | 100,00 |
| WNK1  | exon6 exon6 chr12  | 968390   | 968650   | chr12:968390-968650     | 261  | 968410   | 968630   | chr12:968410-968630     | 221  | refseq WNK1( isoforme1 isoforme2 i:NM_014823, NM_018979, NM_21365:  | 100,00 |
| WNK1  | exon7 exon7 chr12  | 970158   | 970529   | chr12:970158-970529     | 372  | 970178   | 970509   | chr12:970178-970509     | 332  | refseq WNK1( isoforme1 isoforme2 i:NM_014823, NM_018979, NM_21365:  | 100,00 |
| WNK1  | exon8 exon8 chr12  | 971228   | 971456   | chr12:971228-971456     | 229  | 971248   | 971436   | chr12:971248-971436     | 189  | refseq WNK1( isoforme1 isoforme2 i:NM_014823, NM_018979, NM_21365:  | 100,00 |
| WNK1  | exon9 chr12        | 974255   | 974550   | chr12:974255-974550     | 296  | 974275   | 974530   | chr12:974275-974530     | 256  | refseq WNK1( isoforme3):exon9 extrNM_213655                         | 100,00 |
| WNK1  | exon10 exon9 chr12 | 977011   | 978290   | chr12:977011-978290     | 1280 | 977031   | 978270   | chr12:977031-978270     | 1240 | refseq WNK1( isoforme3 isoforme4):NM_213655, NM_001184985           | 100,00 |
| WNK1  | exon9 exon9 chr12  | 980410   | 980534   | chr12:980410-980534     | 125  | 980430   | 980514   | chr12:980430-980514     | 85   | refseq WNK1( isoforme1 isoforme2 i:NM_014823, NM_018979, NM_21365:  | 100,00 |
| WNK1  | exon10 exon1 chr12 | 987357   | 987547   | chr12:987357-987547     | 191  | 987377   | 987527   | chr12:987377-987527     | 151  | refseq WNK1( isoforme2 isoforme3 i:NM_018979, NM_213655, NM_00118:  | 100,00 |
| WNK1  | exon11 chr12       | 988718   | 989217   | chr12:988718-989217     | 500  | 988738   | 989197   | chr12:988738-989197     | 460  | refseq WNK1( isoforme2):exon11 extrNM_018979                        | 100,00 |
| WNK1  | exon12 exon1 chr12 | 989866   | 990185   | chr12:989866-990185     | 320  | 989886   | 990165   | chr12:989886-990165     | 280  | refseq WNK1( isoforme2 isoforme4):NM_018979, NM_001184985           | 100,00 |
| WNK1  | exon11 exon1 chr12 | 990837   | 990975   | chr12:990837-990975     | 139  | 990857   | 990955   | chr12:990857-990955     | 99   | refseq WNK1( isoforme1 isoforme2 i:NM_014823, NM_018979, NM_21365:  | 100,00 |
| WNK1  | exon12 exon1 chr12 | 991056   | 991259   | chr12:991056-991259     | 204  | 991076   | 991239   | chr12:991076-991239     | 164  | refseq WNK1( isoforme1 isoforme2 i:NM_014823, NM_018979, NM_21365:  | 100,00 |
| WNK1  | exon13 exon1 chr12 | 992088   | 992245   | chr12:992088-992245     | 158  | 992108   | 992225   | chr12:992108-992225     | 118  | refseq WNK1( isoforme1 isoforme2 i:NM_014823, NM_018979, NM_21365:  | 100,00 |
| WNK1  | exon14 exon1 chr12 | 992540   | 992754   | chr12:992540-992754     | 215  | 992560   | 992734   | chr12:992560-992734     | 175  | refseq WNK1( isoforme1 isoforme2 i:NM_014823, NM_018979, NM_21365:  | 100,00 |
| WNK1  | exon15 exon1 chr12 | 992919   | 993017   | chr12:992919-993017     | 99   | 992939   | 992997   | chr12:992939-992997     | 59   | refseq WNK1( isoforme1 isoforme2 i:NM_014823, NM_018979, NM_21365:  | 100,00 |
| WNK1  | exon16 exon1 chr12 | 993266   | 993429   | chr12:993266-993429     | 164  | 993286   | 993409   | chr12:993286-993409     | 124  | refseq WNK1( isoforme1 isoforme2 i:NM_014823, NM_018979, NM_21365:  | 100,00 |
| WNK1  | exon17 exon1 chr12 | 993794   | 995270   | chr12:993794-995270     | 1477 | 993814   | 995250   | chr12:993814-995250     | 1437 | refseq WNK1( isoforme1 isoforme2 i:NM_014823, NM_018979, NM_21365:  | 100,00 |
| WNK1  | exon18 exon2 chr12 | 996366   | 996490   | chr12:996366-996490     | 125  | 996386   | 996470   | chr12:996386-996470     | 85   | refseq WNK1( isoforme1 isoforme2 i:NM_014823, NM_018979, NM_21365:  | 100,00 |
| WNK1  | exon19 exon2 chr12 | 998285   | 998409   | chr12:998285-998409     | 125  | 998305   | 998389   | chr12:998305-998389     | 85   | refseq WNK1( isoforme1 isoforme2 i:NM_014823, NM_018979, NM_21365:  | 100,00 |
| WNK1  | exon22 exon2 chr12 | 999598   | 999699   | chr12:999598-999699     | 102  | 999618   | 999679   | chr12:999618-999679     | 62   | refseq WNK1( isoforme2 isoforme3 i:NM_018979, NM_213655, NM_00118:  | 100,00 |
| WNK1  | exon21 exon2 chr12 | 1003707  | 1003821  | chr12:1003707-1003821   | 115  | 1003727  | 1003801  | chr12:1003727-1003801   | 75   | refseq WNK1( isoforme1 isoforme2 i:NM_014823, NM_018979, NM_21365:  | 100,00 |
| WNK1  | exon22 exon2 chr12 | 1005216  | 1005918  | chr12:1005216-1005918   | 703  | 1005236  | 1005898  | chr12:1005236-1005898   | 663  | refseq WNK1( isoforme1 isoforme2 i:NM_014823, NM_018979, NM_21365:  | 100,00 |
| WNK1  | exon23 exon2 chr12 | 1006624  | 1006867  | chr12:1006624-1006867   | 244  | 1006644  | 1006847  | chr12:1006644-1006847   | 204  | refseq WNK1( isoforme1 isoforme2 i:NM_014823, NM_018979, NM_21365:  | 100,00 |
| WNK1  | exon24 exon2 chr12 | 1009621  | 1009856  | chr12:1009621-1009856   | 236  | 1009641  | 1009836  | chr12:1009641-1009836   | 196  | refseq WNK1( isoforme1 isoforme2 i:NM_014823, NM_018979, NM_21365:  | 100,00 |
| WNK1  | exon25 exon2 chr12 | 1016992  | 1017220  | chr12:1016992-1017220   | 229  | 1017012  | 1017200  | chr12:1017012-1017200   | 189  | refseq WNK1( isoforme1 isoforme2 i:NM_014823, NM_018979, NM_21365:  | 100,00 |
| WNK1  | exon26 exon2 chr12 | 1017620  | 1017978  | chr12:1017620-1017978   | 359  | 1017640  | 1017958  | chr12:1017640-1017958   | 319  | refseq WNK1( isoforme1 isoforme2 i:NM_014823, NM_018979, NM_21365:  | 100,00 |

Supplemental\_Table\_3

| Sample ID            | Gene    | gDNA                                           | cDNA                                        | LocalisatorType | CIGAR        | Effect | Protein change               | VAF  | Comments                                             |
|----------------------|---------|------------------------------------------------|---------------------------------------------|-----------------|--------------|--------|------------------------------|------|------------------------------------------------------|
| VL_243_Spleen_B+ #15 | BCOR    | ChrX(GRCh37):g.39921391C>A                     | NM_001123385.1(BCOR):c.4428+1G>T            | Intron 10       | Substitution | -      | Splicing site p.?            | 0.42 | heterozygote (female); same position than COSM521431 |
| VL_201_PB            | BCOR    | ChrX(GRCh37):g.3993091A>T                      | NM_001123385.1(BCOR):c.3030T>A              | Exon 5          | Substitution | -      | Nonsense p.Cys1010*          | 0.91 | hemizygote (male)                                    |
| VL_206_PB_+          | BCOR    | ChrX(GRCh37):g.39931762dup                     | NM_001123385.1(BCOR):c.2837dup              | Exon 4          | Duplication  | 1I     | Frameshift p.Ala947Glyfs*2   | 0.12 | hemizygote (male)                                    |
| VL_208_PB_+          | BCOR    | ChrX(GRCh37):g.39916518_39916528del            | NM_001123385.1(BCOR):c.4475_4485del         | Exon 11         | Deletion     | 11D    | Frameshift p.His1492Argfs*8  | 0.40 | hemizygote (male)                                    |
| VL_208_PB_+          | BCOR    | ChrX(GRCh37):g.39911341-39937202               | -                                           | Exon 4          | Copy number  | -      | Gain                         | -    | gain chr.X (male)                                    |
| VL_214_Spleen        | BCOR    | ChrX(GRCh37):g.39933583dup                     | NM_001123385.1(BCOR):c.1016dup              | Exon 4          | Duplication  | 1I     | Frameshift p.Ser340Valfs*41  | 0.12 | hemizygote (male)                                    |
| VL_230_PB            | BCOR    | ChrX(GRCh37):g.39934211C>A                     | NM_001123385.1(BCOR):c.388G>T               | Exon 4          | Substitution | -      | Nonsense p.Glu130*           | 0.57 | hemizygote (male)                                    |
| VL_232_PB_+ #08      | BCOR    | ChrX(GRCh37):g.39911341-39937202               | -                                           | -               | Copy number  | -      | Loss                         | -    | loss chr.X (female)                                  |
| VL_234_PB            | BCOR    | ChrX(GRCh37):g.39911341-39937202               | -                                           | -               | Copy number  | -      | Loss                         | -    | loss chr.X (female)                                  |
| VL_227_PB_+ #09      | BCOR    | ChrX(GRCh37):g.39911341-39937202               | -                                           | -               | Copy number  | -      | Loss                         | -    | loss chr.X (female)                                  |
| VL_218_PB            | BCOR    | ChrX(GRCh37):g.39911341-39937202               | -                                           | -               | Copy number  | -      | Loss                         | -    | loss chr.X (female)                                  |
| MZ_117_Spleen_B+     | BCOR    | ChrX(GRCh37):g.39911341_39913142del            | NM_001123385.1(BCOR):c.4973_4974del         | Exon 14         | Deletion     | 2D     | Frameshift p.Gln1658Argfs*13 | 0.46 | heterozygote (female)                                |
| HC_301_Spleen        | BRAP    | Chr7(GRCh37):g.140453136A>T                    | NM_004333.4(BRAP):c.1799T>A                 | Exon 15         | Substitution | -      | Missense p.Val600Glu         | 0.35 |                                                      |
| HC_302_Spleen        | BRAP    | Chr7(GRCh37):g.140453136A>T                    | NM_004333.4(BRAP):c.1799T>A                 | Exon 15         | Substitution | -      | Missense p.Val600Glu         | 0.10 |                                                      |
| HC_303_PB            | BRAP    | Chr7(GRCh37):g.140453136A>T                    | NM_004333.4(BRAP):c.1799T>A                 | Exon 15         | Substitution | -      | Missense p.Val600Glu         | 0.42 |                                                      |
| HC_305_PB_+          | BRAP    | Chr7(GRCh37):g.140453136A>T                    | NM_004333.4(BRAP):c.1799T>A                 | Exon 15         | Substitution | -      | Missense p.Val600Glu         | 0.48 |                                                      |
| HC_306_PB_+          | BRAP    | Chr7(GRCh37):g.140453136A>T                    | NM_004333.4(BRAP):c.1799T>A                 | Exon 15         | Substitution | -      | Missense p.Val600Glu         | 0.42 |                                                      |
| HC_309_Spleen        | BRAP    | Chr7(GRCh37):g.140453136A>T                    | NM_004333.4(BRAP):c.1799T>A                 | Exon 15         | Substitution | -      | Missense p.Val600Glu         | 0.40 |                                                      |
| HC_310_PB_+          | BRAP    | Chr7(GRCh37):g.140453136A>T                    | NM_004333.4(BRAP):c.1799T>A                 | Exon 15         | Substitution | -      | Missense p.Val600Glu         | 0.35 |                                                      |
| HC_311_PB_+          | BRAP    | Chr7(GRCh37):g.140453136A>T                    | NM_004333.4(BRAP):c.1799T>A                 | Exon 15         | Substitution | -      | Missense p.Val600Glu         | 0.29 |                                                      |
| MZ_104_Spleen_B+     | BRAP    | Chr7(GRCh37):g.140453136A>T                    | NM_004333.4(BRAP):c.1799T>A                 | Exon 15         | Substitution | -      | Missense p.Val600Glu         | 0.26 |                                                      |
| VL_203_PB_+          | BRAP    | Chr7(GRCh37):g.140481402C>G                    | NM_004333.4(BRAP):c.1406G>C                 | Exon 11         | Substitution | -      | Missense p.Gly469Ala         | 0.42 |                                                      |
| HC_305_PB_+          | KLF2    | Chr19(GRCh37):g.16436489G>A                    | NM_016270.2(KLF2):c.538G>A                  | Exon 2          | Substitution | -      | Missense p.Gly180Ser         | 0.59 | IGHV4-34; rs121913355 (pathogenic)                   |
| MZ_103_Spleen_B+     | KLF2    | Chr19(GRCh37):g.16436813C>T                    | NM_016270.2(KLF2):c.862C>T                  | Exon 2          | Substitution | -      | Missense p.His288Tyr         | 0.47 |                                                      |
| MZ_104_Spleen_B+     | KLF2    | Chr19(GRCh37):g.16436287dup                    | NM_016270.2(KLF2):c.336dup                  | Exon 2          | Duplication  | 1I     | Frameshift p.Leu1138Serfs*15 | 0.26 |                                                      |
| MZ_107_Spleen_B+     | KLF2    | Chr19(GRCh37):g.16436691_16436703del           | NM_016270.2(KLF2):c.740_752del              | Exon 2          | Deletion     | 12D    | Frameshift p.Ala247Glyfs*39  | 0.30 |                                                      |
| MZ_107_Spleen_B+     | KLF2    | Chr19(GRCh37):g.16437747A>T                    | NM_016270.2(KLF2):c.973A>T                  | Exon 3          | Substitution | -      | Missense p.Lys325*           | 0.43 |                                                      |
| MZ_110_Spleen_B+     | KLF2    | Chr19(GRCh37):g.16436772G>A                    | NM_016270.2(KLF2):c.821G>A                  | Exon 2          | Substitution | -      | Missense p.Cys274Tyr         | 0.42 |                                                      |
| MZ_110_Spleen_B+     | KLF2    | Chr19(GRCh37):g.16436837C>T                    | NM_016270.2(KLF2):c.886C>T                  | Exon 2          | Substitution | -      | Missense p.His296Tyr         | 0.40 |                                                      |
| MZ_113_Spleen_B+     | KLF2    | Chr19(GRCh37):g.16437685G>A                    | NM_016270.2(KLF2):c.911G>A                  | Exon 3          | Substitution | -      | Missense p.Cys304Tyr         | 0.47 |                                                      |
| MZ_114_Spleen_B+     | KLF2    | Chr19(GRCh37):g.16436073T>G                    | NM_016270.2(KLF2):c.122T>G                  | Exon 2          | Substitution | -      | Missense p.Leu41Arg          | 0.49 |                                                      |
| MZ_115_Spleen_B+     | KLF2    | Chr19(GRCh37):g.16436837C>T                    | NM_016270.2(KLF2):c.886C>T                  | Exon 2          | Substitution | -      | Missense p.His296Tyr         | 0.45 |                                                      |
| MZ_117_Spleen_B+     | KLF2    | Chr19(GRCh37):g.16436432C>T                    | NM_016270.2(KLF2):c.481C>T                  | Exon 2          | Substitution | -      | Nonsense p.Arg161*           | 0.47 |                                                      |
| MZ_123_Spleen        | KLF2    | Chr19(GRCh37):g.16436823C>T                    | NM_016270.2(KLF2):c.872C>T                  | Exon 2          | Substitution | -      | Missense p.Ala291Val         | 0.76 |                                                      |
| MZ_127_Spleen        | KLF2    | Chr19(GRCh37):g.16436109_16436110insC          | NM_016270.2(KLF2):c.158_159insC             | Exon 2          | Insertion    | 1I     | Frameshift p.Asp540Glyfs*41  | 0.25 |                                                      |
| MZ_129_Spleen        | KLF2    | Chr19(GRCh37):g.16437808A>T                    | NM_016270.2(KLF2):c.1034A>T                 | Exon 3          | Substitution | -      | Missense p.Asp345Val         | 0.38 |                                                      |
| MZ_133_Spleen        | KLF2    | Chr19(GRCh37):g.16436156_16436157dup           | NM_016270.2(KLF2):c.205_206dup              | Exon 2          | Duplication  | 2I     | Frameshift p.Pro70Argfs*72   | 0.19 |                                                      |
| MZ_133_Spleen        | KLF2    | Chr19(GRCh37):g.16436150A>T                    | NM_016270.2(KLF2):c.208G>T                  | Exon 2          | Substitution | -      | Missense p.Pro70Ser          | 0.28 |                                                      |
| MZ_137_Spleen        | KLF2    | Chr19(GRCh37):g.16436026G>A                    | NM_016270.2(KLF2):c.76-1G>A                 | Intron 1        | Substitution | -      | Splicing site p.?            | 0.22 |                                                      |
| MZ_137_Spleen        | KLF2    | Chr19(GRCh37):g.16436765C>T                    | NM_016270.2(KLF2):c.814C>T                  | Exon 2          | Substitution | -      | Missense p.His272Tyr         | 0.26 |                                                      |
| MZ_137_Spleen        | KLF2    | Chr19(GRCh37):g.16436813C>T                    | NM_016270.2(KLF2):c.862C>T                  | Exon 2          | Substitution | -      | Missense p.His288Tyr         | 0.29 |                                                      |
| MZ_148_Spleen_B+     | KLF2    | Chr19(GRCh37):g.16435804C>T                    | NM_016270.2(KLF2):c.70C>T                   | Exon 1          | Substitution | -      | Nonsense p.Gln24*            | 0.47 |                                                      |
| VL_218_PB            | KLF2    | Chr19(GRCh37):g.1643662dup                     | NM_016270.2(KLF2):c.711dup                  | Exon 2          | Duplication  | 1I     | Frameshift p.Ala238Argfs*62  | 0.33 |                                                      |
| VL_201_PB            | MAP2K1  | Chr15(GRCh37):g.66727463T>A                    | NM_002755.3(MAP2K1):c.179T>A                | Exon 2          | Substitution | -      | Missense p.Val60Glu          | 0.30 | IGHV3-23*01                                          |
| VL_203_PB_+          | MAP2K1  | Chr15(GRCh37):g.66729100T>A                    | NM_002755.3(MAP2K1):c.308T>A                | Exon 3          | Substitution | -      | Missense p.Ile103Asn         | 0.47 | IGHV4-34*01                                          |
| VL_208_PB_+          | MAP2K1  | Chr15(GRCh37):g.66729154G>C                    | NM_002755.3(MAP2K1):c.362G>C                | Exon 3          | Substitution | -      | Missense p.Cys121Ser         | 0.48 | IGHV1-3*01                                           |
| MZ_102_Spleen_B+     | MDM8    | Chr3(GRCh37):g.38182641T>C                     | NM_002468.4(MDM8):c.794T>C                  | Exon 5          | Substitution | -      | Missense p.Leu265Pro         | 0.44 |                                                      |
| MZ_114_Spleen_B+     | MDM8    | Chr3(GRCh37):g.38180153A>G                     | NM_001172567.1(MDM8):c.1A>G                 | Exon 1          | Substitution | -      | Start loss p.Het12*          | 0.47 |                                                      |
| MZ_124_Spleen        | MDM8    | Chr3(GRCh37):g.38182025G>T                     | NM_001172567.1(MDM8):c.649G>T               | Exon 3b         | Substitution | -      | Missense p.Val217Phe         | 0.37 |                                                      |
| MZ_130_Spleen        | MDM8    | Chr3(GRCh37):g.38182025G>T                     | NM_001172567.1(MDM8):c.649G>T               | Exon 3b         | Substitution | -      | Missense p.Val217Phe         | 0.33 |                                                      |
| HC_310_PB_+          | NOTCH1  | Chr9(GRCh37):g.13940970G>A                     | NM_017617.3(NOTCH1):c.222T>C                | Exon 14         | Substitution | -      | Missense p.Pro743Ser         | 0.50 |                                                      |
| MZ_111_Spleen_B+     | NOTCH1  | Chr9(GRCh37):g.139409775C>T                    | NM_017617.3(NOTCH1):c.1981G>A               | Exon 12         | Substitution | -      | Missense p.Gly661Ser         | 0.43 |                                                      |
| MZ_119_Spleen_B+     | NOTCH1  | Chr9(GRCh37):g.139402516T>C                    | NM_017617.3(NOTCH1):c.3401A>G               | Exon 21         | Substitution | -      | Missense p.Gln1134Arg        | 0.46 |                                                      |
| MZ_128_Spleen        | NOTCH1  | Chr9(GRCh37):g.139412624G>A                    | NM_017617.3(NOTCH1):c.1220C>T               | Exon 7          | Substitution | -      | Missense p.Pro407Leu         | 0.47 |                                                      |
| MZ_134_Spleen        | NOTCH1  | Chr9(GRCh37):g.139409061C>T                    | NM_017617.3(NOTCH1):c.2108G>A               | Exon 13         | Substitution | -      | Missense p.Arg703His         | 0.48 |                                                      |
| VL_202_PB_+          | NOTCH1  | Chr9(GRCh37):g.139413972C>A                    | NM_017617.3(NOTCH1):c.788G>T                | Exon 5          | Substitution | -      | Missense p.Gly263Val         | 0.38 |                                                      |
| MZ_227_PB_+ #09      | NOTCH2  | Chr1(GRCh37):g.12045808G>A                     | NM_024408.2(NOTCH2):c.726C>T                | Exon 34         | Substitution | -      | Missense p.Ser242Phe         | 0.47 |                                                      |
| VL_227_PB_+ #09      | NOTCH2  | Chr1(GRCh37):g.12045808G>A                     | NM_024408.2(NOTCH2):c.725T>C                | Exon 34         | Substitution | -      | Missense p.Ser2418Phe        | 0.48 |                                                      |
| MZ_102_Spleen_B+     | NOTCH2  | Chr1(GRCh37):g.120478125A>C                    | NM_024408.2(NOTCH2):c.3625T>G               | Exon 22         | Substitution | -      | Missense p.Phe1209Val        | 0.49 |                                                      |
| MZ_108_Spleen_B+     | NOTCH2  | Chr1(GRCh37):g.120458255G>A                    | NM_024408.2(NOTCH2):c.7090C>T               | Exon 34         | Substitution | -      | Nonsense p.Gln2364*          | 0.47 |                                                      |
| MZ_109_Spleen_B+     | NOTCH2  | Chr1(GRCh37):g.120458147G>A                    | NM_024408.2(NOTCH2):c.7198C>T               | Exon 34         | Substitution | -      | Nonsense p.Arg2400*          | 0.40 |                                                      |
| MZ_114_Spleen_B+     | NOTCH2  | Chr1(GRCh37):g.120458466dup                    | NM_024408.2(NOTCH2):c.6879dup               | Exon 34         | Duplication  | 1I     | Frameshift p.Ile2294Hisfs*19 | 0.36 |                                                      |
| MZ_115_Spleen_B+     | NOTCH2  | Chr1(GRCh37):g.120458283del                    | NM_024408.2(NOTCH2):c.7062del               | Exon 34         | Deletion     | 1D     | Frameshift p.Thr2355Leufs*3  | 0.58 |                                                      |
| MZ_127_Spleen        | NOTCH2  | Chr1(GRCh37):g.120458430_120458435delinsAAAAAG | NM_024408.2(NOTCH2):c.6910_6915delinsCTTTTT | Exon 34         | Deletion     | 6D/7I  | Frameshift p.Ile2304Leufs*9  | 0.34 |                                                      |
| MZ_134_Spleen        | NOTCH2  | Chr1(GRCh37):g.120458147G>A                    | NM_024408.2(NOTCH2):c.7198C>T               | Exon 34         | Substitution | -      | Nonsense p.Arg2400*          | 0.44 |                                                      |
| MZ_140_Spleen        | NOTCH2  | Chr1(GRCh37):g.120458895_120458896del          | NM_024408.2(NOTCH2):c.6449_6450del          | Exon 34         | Deletion     | 2D     | Frameshift p.Pro2150Argfs*2  | 0.15 |                                                      |
| VL_215_PB            | NOTCH2  | Chr1(GRCh37):g.120458888del                    | NM_024408.2(NOTCH2):c.6457del               | Exon 34         | Deletion     | 1D     | Frameshift p.Ser2153Profs*50 | 0.47 |                                                      |
| VL_216_PB            | NOTCH2  | Chr1(GRCh37):g.120458102_120458121del          | NM_024408.2(NOTCH2):c.7224_7243del          | Exon 34         | Deletion     | 19D    | Frameshift p.Gln2409Aspfs*8  | nd   |                                                      |
| VL_236_PB            | NOTCH2  | Chr1(GRCh37):g.120458498_120458499insGTAT      | NM_024408.2(NOTCH2):c.6846_6847insATAC      | Exon 34         | Insertion    | 4I     | Frameshift p.Ala2293Ilefs*9  | 0.13 |                                                      |
| MZ_114_Spleen_B+     | SPEN    | Chr1(GRCh37):g.16174594_16174595del            | NM_015001.2(SPEN):c.32_33del                | Exon 1          | Deletion     | 2D     | Frameshift p.Gly1161ufs*33   | 0.50 |                                                      |
| MZ_145_Spleen        | SPEN    | Chr1(GRCh37):g.16261356del                     | NM_015001.2(SPEN):c.862del                  | Exon 11         | Deletion     | 1D     | Frameshift p.Pro2874Leufs*15 | 0.35 |                                                      |
| MZ_145_Spleen        | SPEN    | Chr1(GRCh37):g.16256512del                     | NM_015001.2(SPEN):c.3777del                 | Exon 11         | Deletion     | 1D     | Frameshift p.Gly1260Valfs*17 | 0.36 |                                                      |
| MZ_149_Spleen_B+     | SPEN    | Chr1(GRCh37):g.16256470C>A                     | NM_015001.2(SPEN):c.3735C>A                 | Exon 11         | Substitution | -      | Nonsense p.Tyr124*           | 0.50 |                                                      |
| MZ_149_Spleen_B+     | SPEN    | Chr1(GRCh37):g.16262129A>G                     | NM_015001.2(SPEN):c.3934A>G                 | Exon 11         | Substitution | -      | Missense p.Arg3132Gly        | 0.51 |                                                      |
| VL_229_PB            | SPEN    | Chr1(GRCh37):g.16256282C>T                     | NM_015001.2(SPEN):c.3793C>T                 | Exon 11         | Substitution | -      | Nonsense p.Arg1265*          | 0.28 |                                                      |
| VL_233_PB            | SPEN    | Chr1(GRCh37):g.16237787A>G                     | NM_015001.2(SPEN):c.1234A>G                 | Exon 5          | Substitution | -      | Missense p.Ile412Val         | 0.52 |                                                      |
| MZ_103_Spleen_B+     | TNFAIP3 | Chr6(GRCh37):g.138199621C>T                    | NM_001270507.1(TNFAIP3):c.1039G>T           | Exon 7          | Substitution | -      | Nonsense p.Glu347*           | 0.24 |                                                      |
| MZ_121_Spleen        | TNFAIP3 | Chr6(GRCh37):g.138199757del                    | NM_001270507.1(TNFAIP3):c.1175del           | Exon 7          | Deletion     | 1D     | Frameshift p.Cys392Serfs*7   | 0.37 |                                                      |
| MZ_129_Spleen        | TNFAIP3 | Chr6(GRCh37):g.138199950dup                    | NM_001270507.1(TNFAIP3):c.1368dup           | Exon 7          | Duplication  | 1I     | Frameshift p.Pro457Alafs*16  | 0.28 |                                                      |
| MZ_130_Spleen        | TNFAIP3 | Chr6(GRCh37):g.138199850C>G                    | NM_001270507.1(TNFAIP3):c.547C>G            | Exon 4          | Substitution | -      | Missense p.Arg183Gly         | 0.46 |                                                      |
| MZ_131_Spleen        | TNFAIP3 | Chr6(GRCh37):g.138199748C>T                    | NM_001270507.1(TNFAIP3):c.1166C>T           | Exon 7          | Substitution | -      | Missense p.Thr389Met         | 0.47 |                                                      |
| MZ_145_Spleen        | TNFAIP3 | Chr6(GRCh37):g.138198249del                    | NM_001270507.1(TNFAIP3):c.842del            | Exon 6          | Deletion     | 1D     | Frameshift p.Gly381Glyfs*6   | 0.15 |                                                      |
| MZ_145_Spleen        | TNFAIP3 | Chr6(GRCh37):g.138200325_138200326del          | NM_001270507.1(TNFAIP3):c.1743_1744del      | Exon 7          | Deletion     | 2D     | Frameshift p.Arg381Serfs*90  | 0.44 |                                                      |
| MZ_148_Spleen_B+     | TNFAIP3 | Chr6(GRCh37):g.138198896_138198897del          | NM_001270507.1(TNFAIP3):c.1314_1315del      | Exon 7          | Deletion     | 2D     | Frameshift p.Arg439Glyfs*5   | 0.11 |                                                      |
