# Supplementary material for: Exome sequencing identifies recurrent BCOR alterations and the absence of KLF2, TNFAIP3 and MYD88 mutations in splenic diffuse red pulp small B-cell lymphoma
Source: PubMed Central journal article supplement — Haematologica. 2017 Jul 27;102(10):1758–66. doi: 10.3324/haematol.2016.160192 (PMC5622860; doi:10.3324/haematol.2016.160192), 2017-10
Supplement: 2016_160192-Disclosures_and_Contributions.pdf [file 2016_160192-Disclosures_and_Contributions.pdf]

Haematologica  
HAEMATOL/2016/160192  
Version 4

Exome sequencing identifies recurrent BCOR gene alterations and the absence of KLF2, TNFAIP3 and MYD88 mutations in splenic diffuse red pulp small B-cell lymphoma

Laurent Jallades, Lucile Baseggio, Pierre Sujobert, Sarah Huet, Kaddour Chabane, Evelyne Callet-Bauchu, Aurélie Verney, Sandrine Hayette, Jean-Pierre Desvignes, David Salgado, Nicolas Levy, Christophe Bérout, Pascale Felman, Françoise Berger, Jean-Pierre Magaud, Laurent Genestier, Gilles Salles, and Alexandra Traverse-Glehen

Disclosures: All the authors declare no conflicts of interests.

Contributions: LJ performed the research, interpreted the data and wrote the paper; AV and KC performed the experiments; PS, SHu, SHa, JPD, CB, DS, NL, LG interpreted the data; clinical cases were selected and extensively reviewed by expert pathologists (ATG, FB), cytologists and immunologists (LJ, LB, PF), and cytogeneticists (ECB, JPM); LJ, ATG and GS designed the research study. LJ, LB, ATG, and GS interpreted the data and wrote the paper.
