# Supplementary material for: Exome sequencing identifies recurrent BCOR alterations and the absence of KLF2, TNFAIP3 and MYD88 mutations in splenic diffuse red pulp small B-cell lymphoma
Source: PubMed Central journal article supplement — Haematologica. 2017 Jul 27;102(10):1758–66. doi: 10.3324/haematol.2016.160192 (PMC5622860; doi:10.3324/haematol.2016.160192), 2017-10

# Exome sequencing identifies recurrent *BCOR* alterations and the absence of *KLF2*, *TNFAIP3* and *MYD88* mutations in splenic diffuse red pulp small B-cell lymphoma

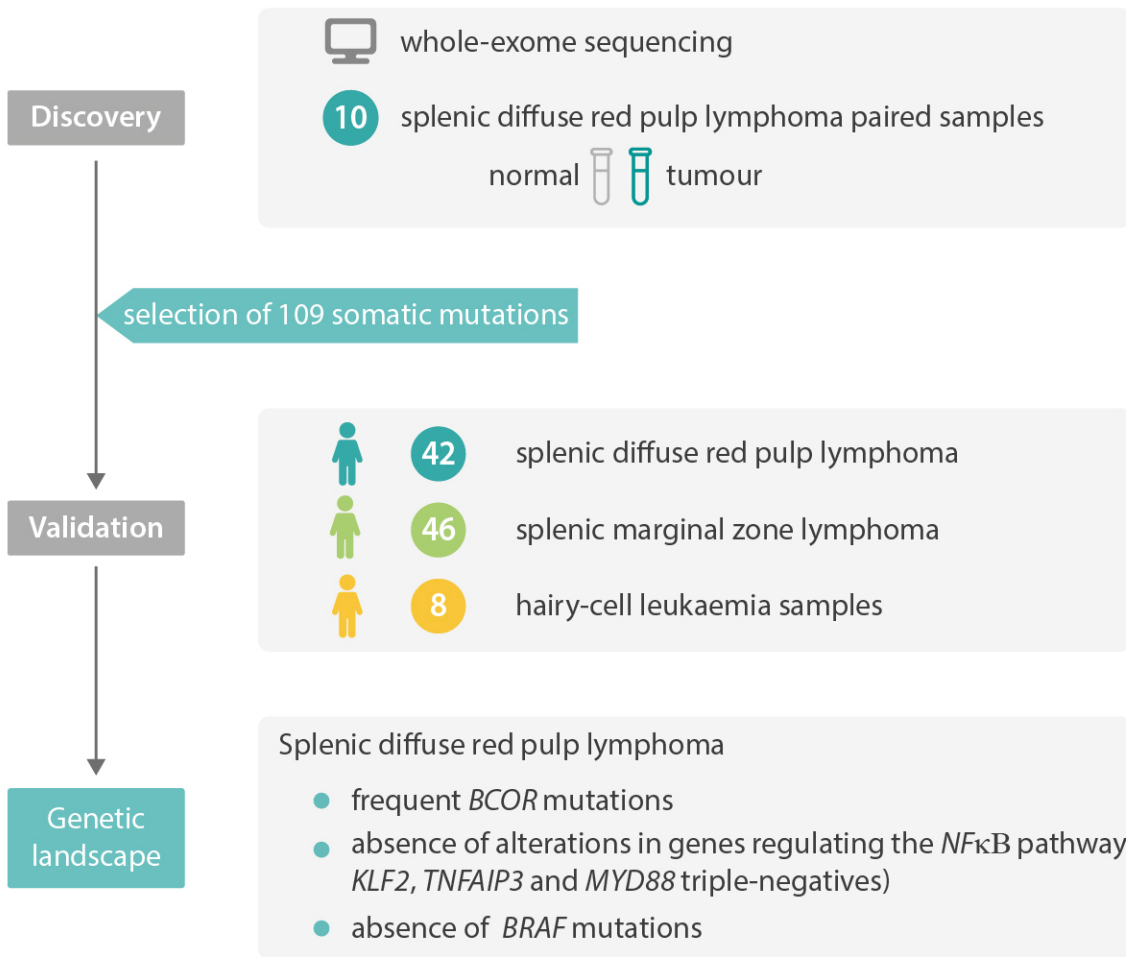

Supplement: HAEMATOL-2016-160192_JALLADES.pdf [file HAEMATOL-2016-160192_JALLADES.pdf]
